# Supplementary material for: Barriers and facilitators to adopting high value practices and de-adopting low value practices in Canadian intensive care units: a multimethod study
Source: PubMed Central journal article supplement — BMJ Open. 2019 Mar 15;9(3):e024159. doi: 10.1136/bmjopen-2018-024159 (PMC6429967; doi:10.1136/bmjopen-2018-024159), 2019-03-15
Supplement: bmjopen-2018-024159.draft_revisions.pdf [file bmjopen-2018-024159.draft_revisions.pdf]

# BMJ Open

BMJ Open is committed to open peer review. As part of this commitment we make the peer review history of every article we publish publicly available.

When an article is published we post the peer reviewers' comments and the authors' responses online. We also post the versions of the paper that were used during peer review. These are the versions that the peer review comments apply to.

The versions of the paper that follow are the versions that were submitted during the peer review process. They are not the versions of record or the final published versions. They should not be cited or distributed as the published version of this manuscript.

BMJ Open is an open access journal and the full, final, typeset and author-corrected version of record of the manuscript is available on our site with no access controls, subscription charges or pay-per-view fees (<http://bmjopen.bmj.com>).

If you have any questions on BMJ Open's open peer review process please email [info.bmjopen@bmj.com](mailto:info.bmjopen@bmj.com)

# BMJ Open

## Barriers and facilitators to adopting high value practices and de-adopting low value practices in the Intensive Care Unit: A multi method study

|                               |                                                                                                                                                                                                                                                                                                                                                                                                                                                                                                               |
|-------------------------------|---------------------------------------------------------------------------------------------------------------------------------------------------------------------------------------------------------------------------------------------------------------------------------------------------------------------------------------------------------------------------------------------------------------------------------------------------------------------------------------------------------------|
| Journal:                      | <i>BMJ Open</i>                                                                                                                                                                                                                                                                                                                                                                                                                                                                                               |
| Manuscript ID                 | bmjopen-2018-024159                                                                                                                                                                                                                                                                                                                                                                                                                                                                                           |
| Article Type:                 | Research                                                                                                                                                                                                                                                                                                                                                                                                                                                                                                      |
| Date Submitted by the Author: | 11-May-2018                                                                                                                                                                                                                                                                                                                                                                                                                                                                                                   |
| Complete List of Authors:     | Sauro, Khara; University of Calgary Cumming School of Medicine, Bagshaw, Sean; University of Alberta, Canada<br>Niven, Daniel; University of Calgary, Critical Care Medicine<br>Soo, Andrea; University of Calgary Cumming School of Medicine<br>Brundin-Mather, Rebecca; University of Calgary Cumming School of Medicine<br>Parsons Leigh, Jeanna; University of Calgary Cumming School of Medicine<br>Cook, Deborah; McMaster University,<br>Stelfox, Henry; University of Calgary, Critical Care Medicine |
| Keywords:                     | Quality Improvement, Healthcare System, Under-use and Over-use, Appropriateness, Intensive Care                                                                                                                                                                                                                                                                                                                                                                                                               |
|                               |                                                                                                                                                                                                                                                                                                                                                                                                                                                                                                               |

SCHOLARONE™  
Manuscripts

Peer Review Only

**Title:** Barriers and facilitators to adopting high value practices and de-adopting low value practices in the Intensive Care Unit: A multi method study

**Authors & Affiliations:**

Khara M Sauro PhD,<sup>1,2</sup> Sean M Bagshaw MSc MD,<sup>4</sup> Daniel J Niven MD PhD,<sup>1,2</sup> Andrea Soo PhD,<sup>1</sup> Rebecca Brundin-Mather MASc,<sup>3</sup> Jeanna Parsons Leigh PhD,<sup>1</sup> Deborah J Cook MD,<sup>5</sup> Henry T Stelfox MD PhD<sup>1,2</sup>

<sup>1</sup> Department of Critical Care Medicine, University of Calgary, Calgary AB Canada

<sup>2</sup> Department of Community Health Sciences and O'Brien Institute for Public Health, University of Calgary, Calgary AB Canada

<sup>3</sup> Department of Medicine, University of Calgary, Calgary AB Canada

<sup>4</sup> Department of Critical Care Medicine, Faculty of Medicine & Dentistry, and the School of Public Health, University of Alberta, Edmonton AB Canada

<sup>5</sup> Departments of Medicine and Clinical Epidemiology & Biostatistics, McMaster University, Hamilton ON Canada

**Corresponding Author:**

Dr. H. Thomas Stelfox  
3134 Hospital Drive NW  
Calgary AB  
T2N 5A1  
Canada  
403-944-0072  
[tstelfox@ucalgary.ca](mailto:tstelfox@ucalgary.ca)

**Word Count:** Manuscript=3,368; Abstract=239

**References:** 47

**Figures and tables:** 4 figures, 1 table

## ABSTRACT

**Objective:** To compare and contrast illustrative examples of the adoption of high value practices and the de-adoption of low value practices.

**Design:** 1) Retrospective, population-based audit of low molecular weight heparin (LMWH) for venous thromboembolism (VTE) prophylaxis (high value practice) and albumin for fluid resuscitation (low value practice) and 2) Cross-sectional survey of healthcare providers.

**Setting:** Data were collected from nine adult medical-surgical ICUs in two large Canadian cities. Patients are managed in these ICUs by a group of multi-professional and multi-disciplinary healthcare providers.

**Participants:** Participants included 6946 ICU admissions and 309 healthcare providers from the same ICUs.

**Main Outcome Measures:** 1) The use of LMWH for VTE prophylaxis (percent ICU days) and albumin for fluid resuscitation (percent of patients); and 2) provider knowledge of evidence underpinning these practices, and barriers and facilitators to adopt and de-adopt these practices.

**Results:** LMWH was administered on 38.7% of ICU days, and 20.0% of patients received albumin.

1  
2  
3 Most participants had knowledge of evidence underpinning VTE prophylaxis and fluid  
4 resuscitation (59.1% and 84.2%, respectively). Providers perceived these practices to  
5 be followed. The most commonly reported barrier to adoption was insufficient  
6 knowledge/understanding (32.8%), and to de-adoption was clinical leader preferences  
7 (33.2%). On-site education was the most commonly identified facilitator for adoption  
8 and de-adoption (67.8% and 68.6%, respectively).  
9

10  
11  
12  
13  
14  
15  
16  
17  
18  
19 **Conclusions:** Despite knowledge of and self-reported adherence to best practices,  
20 the audit demonstrated opportunity to improve. Provider-reported barriers and  
21 facilitators to adoption and de-adoption are broadly similar.  
22  
23  
24  
25  
26  
27

28 **KEY WORDS:** Intensive Care; Appropriateness, Under-use and Over-use; Healthcare  
29 System; Quality Improvement  
30  
31  
32  
33

### 34 **STRENGTHS & LIMITATIONS**

- 35  
36  
37 • A strength of this study is the use of mixed-methods to comprehensively  
38 compare adoption of high value practices and de-adoption of low value  
39 practices in the ICU.  
40  
41  
42
- 43  
44 • Another strength is the use of population-based data to capture current clinical  
45 practices.  
46  
47
- 48  
49 • A limitation of this study is related to the survey used to assess barriers and  
50 facilitators of the two illustrative practices; perfection was compromised to  
51 optimize the practicality of the survey.  
52  
53  
54  
55  
56  
57  
58  
59  
60

- 1  
2  
3  
4  
5  
6  
7  
8  
9  
10  
11  
12  
13  
14  
15  
16  
17  
18  
19  
20  
21  
22  
23  
24  
25  
26  
27  
28  
29  
30  
31  
32  
33  
34  
35  
36  
37  
38  
39  
40  
41  
42  
43  
44  
45  
46  
47  
48  
49  
50  
51  
52  
53  
54  
55  
56  
57  
58  
59  
60
- Another limitation is the comparison of two practices, which may account for some of the differences observed between adoption of the high value practice and de-adoption of the low value practice.
  - Our study provides several insights into similarities and differences between adoption of high value practices and de-adoption of low value practices.

For peer review only

## INTRODUCTION

Optimizing the quality of care<sup>1</sup> is of particular importance in the intensive care unit (ICU) due to the acuity of patient illness and substantial resources required to care for these patients. However, it is estimated that practice change (adopting high value practices or de-adopting low value practices) can take up to 17 years.<sup>2</sup> To minimize the latency for change, it is important find ways to improve the implementation of evidence-based practices.

A growing body of evidence has evaluated barriers and facilitators for adopting high value practices (effective at improving outcomes).<sup>3-6</sup> Substantially less is known about the barriers and facilitators for de-adopting low value practices (ineffective at improving outcomes or harmful), and how they compare to those for adopting high value practices.<sup>7,8</sup> De-adoption is the discontinuation of a practice that has been previously adopted.<sup>9</sup> Terminology used to describe de-adoption is voluminous – over 43 terms have been identified, with little consensus on the most appropriate term.<sup>7</sup> Some have suggested that the adoption of high value practices and de-adoption of low value practices involve similar processes and common facilitators and barriers;<sup>10,11</sup> however, others suggest that the two are clearly distinct.<sup>8,12</sup> There has been limited comparative evaluation of adoption and de-adoption and this is an important knowledge gap given the growing number of initiatives aimed at de-adopting low value practices.<sup>13-16</sup>

1  
2  
3 The two illustrative practices (one for adoption of a high value practice and one for de-  
4 adoption of a low value practice) used in our study were chosen by a network of  
5 medical-surgical ICUs based on published evidence and stakeholder engagement.<sup>17</sup>  
6  
7  
8 The expanding evidence (randomized trials, a systematic review and meta-analysis,  
9  
10 and an economic evaluation)<sup>18-20</sup> suggests LMWH is a high value practice relative to  
11 unfractionated heparin (UFH) for VTE prophylaxis, which is also reflected in recent  
12 international and local clinical practice guidelines.<sup>21,22</sup> The evidence (multiple  
13  
14 randomized trials and a systematic review)<sup>23</sup> indicates that albumin is a low value  
15  
16 practice relative to crystalloids for fluid resuscitation. Patient and family  
17  
18 representatives, frontline providers and decision-makers considered the totality of the  
19  
20 evidence from a clinically grounded perspective (i.e., evaluated the evidence using a  
21  
22 patient-centred and healthcare focused perspective), and through validated  
23  
24 consensus methods chose low molecular weight heparin (LMWH) for venous  
25  
26 thromboembolism (VTE) prophylaxis and albumin for fluid resuscitation as illustrative  
27  
28 examples of adoption of a high value practice and de-adoption of a low value practice,  
29  
30 respectively.<sup>17</sup>  
31  
32  
33  
34  
35  
36  
37  
38  
39  
40  
41  
42

## 43 **METHODS**

### 44 **Aim**

45  
46 The objective of this study was to describe illustrative example practices of the  
47  
48 adoption of high value practices and the de-adoption of low value practices in the ICU.  
49  
50 The results of this study prompted a subsequent implementation study to improve  
51  
52 these two practices. The audit data identified important opportunities to improve  
53  
54  
55  
56  
57  
58  
59  
60



1  
2  
3 clinical care, and the perceived barriers and facilitators identified in the survey were  
4  
5 used to inform the development of interventions.  
6  
7  
8  
9

## 10 **Study design**

11  
12 This multi-method observational study included: 1) a retrospective cohort study of  
13  
14 patients admitted to ICUs to describe current VTE prophylaxis and fluid resuscitation  
15  
16 practices, and 2) a cross-sectional survey of ICU healthcare providers to examine:  
17  
18 knowledge of evidence underpinning these two practices, and perceived barriers and  
19  
20 facilitators to adopt LMWH for VTE prophylaxis and de-adopt albumin for fluid  
21  
22 resuscitation.  
23  
24  
25  
26  
27

## 28 **Setting**

29  
30 All data were collected from nine adult medical-surgical ICUs in the two largest cities  
31  
32 in a Canadian province (population of 4.1 million). A single health services provider is  
33  
34 responsible for the provision of all hospital-based care in the province and uses a  
35  
36 single formulary across all ICUs (clinical practices may differ between cities and sites).  
37  
38 ICU patients are managed by a multi-disciplinary and multi-professional group of  
39  
40 healthcare providers, including (but not limited to): physicians, medical trainees  
41  
42 (clinical fellows and residents), nurse practitioners (NPs with prescribing privileges),  
43  
44 pharmacists, and nurses (managers, educators, bedside).  
45  
46  
47  
48  
49  
50

## 51 **Audit of current practices**

52  
53  
54 Participants  
55  
56  
57  
58  
59  
60

1  
2  
3 We included patients admitted to nine adult medical-surgical ICUs between January 1,  
4 2014 and December 31, 2014. For analyses, patients were grouped into two cohorts.

5  
6  
7 1) The adoption cohort consisted of patients without a contraindication for  
8 pharmacological VTE prophylaxis where according to international and local  
9 guidelines LMWH should be prescribed.<sup>18,21,22,24,25</sup> Contraindications to  
10 pharmacological prophylaxis included a diagnosis potentially associated with a high  
11 risk of bleeding (Supplemental Content 1), daily assessed platelet count  $<50 \times 10^9/L$ ,  
12 INR  $\geq 2$ , PTT  $\geq 55$  seconds, or receipt of therapeutic anti-coagulation.

13  
14  
15 2) The de-adoption cohort consisted of patients without an indication for use of  
16 albumin for fluid resuscitation and where according to the current evidence-base  
17 albumin should not be used for fluid resuscitation.<sup>23,26-28</sup> Potential indications for  
18 albumin included documented liver disease (cirrhosis or hepatic failure), or receipt of  
19 plasma exchange.<sup>29-32</sup> The two study cohorts were drawn from the same patient  
20 population and patients satisfying both sets of clinical indications were included in  
21 both cohorts.

#### 22 23 24 25 26 27 28 29 30 31 32 33 34 35 36 37 38 39 40 Data source

41  
42 All nine ICUs employ a shared integrated, prospective, clinical information system that  
43 captures and delivers multimodal patient data (demographic, clinical, outcome) in real  
44 time to the bedside (eCritical MetaVision, iMDsoft, MetaVision), and is also a  
45 repository and clinical analytics system that stores these data (eCritical TRACER) to  
46 support quality improvement and clinical research. eCritical TRACER was used to  
47 extract all data.  
48  
49  
50  
51  
52  
53  
54  
55  
56  
57  
58  
59  
60

## Variables

Patient and ICU demographic variables included age, sex, comorbidities, admission type, disease severity (APACHE II score), ICU and hospital length of stay, ICU and hospital mortality. Data abstracted included: 1) type of VTE prophylaxis (mechanical included antiembolic stockings and sequential compression devices, and pharmacological included UFH and LMWH), 2) ICU day that VTE prophylaxis was administered, 3) if the patient received albumin, 4) quantity (units) of albumin, and 5) ICU day that albumin was administered. An ICU day was defined as any portion of a day between 07:00 and 06:59, recognizing that follow-up time on admission day and discharge day may be less than 24 hours.

## Data analysis

Descriptive statistics (means with standard deviations [SD], medians with interquartile ranges [IQR], frequencies with proportions) were used to describe the two cohorts. The proportion of admissions and ICU days with LMWH, UFH, and mechanical VTE prophylaxis by ICU and ICU day; and with any albumin administration by ICU and patient were calculated to describe current clinical practices.

To examine potential associations between demographic and site-level factors, and the adoption of the high value practice (LMWH) a multivariable generalized estimating equations (GEEs) logistic regression model with exchangeable correlation structure given daily measurements (clustering by patient) was used. To examine potential

1  
2  
3 associations between demographic and site-level factors, and the de-adoption of the  
4 low value practice (albumin) a multivariable logistic regression model given a single  
5 measurement per patient was used.  
6  
7  
8  
9

## 10 11 12 **Barriers and facilitators to adopting LMWH for VTE prophylaxis and de-adopting** 13 **albumin for fluid resuscitation** 14

### 15 16 17 Survey development 18

19 The survey was modeled after previous work on adoption of LMWH for VTE  
20 prophylaxis,<sup>33</sup> and refined to include questions regarding fluid resuscitation. Because  
21 research around barriers and facilitators of de-adopting low value practices is in its  
22 infancy<sup>34</sup> the evidence of barriers and facilitators for adopting high value practices was  
23 employed.  
24  
25  
26  
27  
28  
29

30  
31  
32 The survey was divided into four sections: participant demographic information,  
33 knowledge of the current evidence underpinning the best practices, and perceptions  
34 of barriers and facilitators to the use of the two illustrative examples of best practices  
35 (Supplemental Content 2).  
36  
37  
38  
39  
40  
41

42  
43  
44 The survey was pilot tested in two phases: Phase 1) Seven providers completed the  
45 survey and identified unnecessary, missing, or poorly worded items. The survey was  
46 modified and pilot tested with 12 additional ICU providers (1 attending physician, 2  
47 residents, 1 clinical fellow, 1 nurse practitioner, 1 nurse manager/charge nurse, 1  
48 nurse educator, 2 bedside nurses, and 3 pharmacists). Phase 2) Providers completed  
49  
50  
51  
52  
53  
54  
55  
56  
57  
58  
59

1  
2  
3 the survey twice (7-10 days apart) and an additional brief questionnaire to rate the  
4 clinical sensibility of the survey. Test-retest reliability of the survey demonstrated a  
5 mean intraclass correlation coefficient (ICC) of 0.66 (SD 0.47) for continuous  
6 responses and a mean proportion of agreement of 0.86 (SD 0.10) for categorical  
7 responses. The low ICC for continuous responses is due to low variability in  
8 responses for questions relating to knowledge of best practices. The participants  
9 agreed that the survey had face validity (100%), content validity (92%), clarity (92%),  
10 utility (100%), discriminability (75%), and minimal redundancy (100%).  
11  
12  
13  
14  
15  
16  
17  
18  
19  
20  
21  
22  
23

## 24 Participants

25  
26 Healthcare providers (as described in Setting) that cared for patients in the nine ICUs  
27 were invited by email to participate in the study. Invitations to participate were sent to  
28 healthcare providers by the principal investigators or by a local clinical leader and  
29 included a link to the electronic survey (Fluid Survey) or were provided a paper copy if  
30 requested. Weekly reminders were sent for three weeks. Providers that responded to  
31 the survey were offered entry into a draw for one of three \$20 coffee gift cards.  
32  
33  
34  
35  
36  
37  
38  
39  
40  
41

## 42 Data Analysis

43  
44 We used descriptive statistics to describe demographic features of participants,  
45 knowledge of best practices, perceived barriers to adopting high value practices and  
46 de-adopting low value practices, perceived facilitators to encourage adopting high  
47 value practices and de-adopting low value practices. Barriers and facilitators to the  
48 use of best practices were described overall, and by professional group. Professions  
49  
50  
51  
52  
53  
54  
55  
56  
57  
58  
59  
60

1  
2  
3 were categorized into three groups for analysis: 1) Physicians/NPs (those who  
4 prescribe), 2) Nurses (those who administer), and 3) Pharmacists (those who advise  
5 prescribers). Chi-squared tests were used to test for statistical significance between  
6  
7  
8  
9  
10 groups.

### 11 12 13 14 15 **Ethical considerations**

16  
17 This study was approved by the University of Calgary Conjoint Health Research  
18  
19 Ethics Board (REB14-0992 and REB15-2147) and the University of Alberta Research  
20  
21 Ethics Board (Pro00056709 and Pro00060650).  
22  
23  
24  
25

## 26 **RESULTS**

### 27 28 **Audit of current practices**

#### 29 30 **Patients**

31  
32  
33 There were 6,946 ICU admissions during the study period, from 6,299 unique  
34  
35 patients. The typical ICU admission was a 60 (IQR=46-71) year old male (58.4%),  
36  
37 with at least one comorbidity (44.6%), and admitted for a medical reason (59.9%).  
38  
39 The median ICU and hospital length of stay were 3.7 (IQR=1.8-7.7) days, and 13.3  
40  
41 (IQR=6.1-29.5) days, respectively. ICU and hospital mortality were 14.1% and 21.0%,  
42  
43 respectively (Supplemental Content 3).  
44  
45  
46  
47  
48

49  
50 The adoption cohort consisted of 4,931 admissions (71.0% of all admissions) without  
51  
52 a contraindication to pharmacological VTE prophylaxis, and the de-adoption cohort  
53  
54  
55  
56  
57  
58  
59  
60

1  
2  
3 consisted of 6,467 admissions (93.1%) without a potential indication for albumin  
4  
5 (Figure 1).  
6  
7  
8  
9

#### 10 VTE prophylaxis (adoption cohort)

11  
12 During the ICU stay LMWH was given on 38.7% of ICU days, UFH on 45.3% of ICU  
13  
14 days and mechanical prophylaxis (exclusive of pharmacological prophylaxis) on 7.7%  
15  
16 of ICU days. The type of VTE prophylaxis administered varied throughout patients'  
17  
18 ICU stay; administration of mechanical devices and UFH decreased over the course  
19  
20 of the ICU stay while administration of LMWH increased (Figure 2).  
21  
22  
23  
24  
25

#### 26 Albumin for fluid resuscitation (de-adoption cohort)

27  
28 6,804 units of albumin were administered to 20.0% of the 6,467 admissions without  
29  
30 documented liver disease or receipt of plasma exchange. Among those receiving at  
31  
32 least 1 unit of albumin, the median number of units per patient was 3 (IQR=1.0-6.0).  
33  
34  
35 Albumin was administered on 6.5% of ICU days.  
36  
37  
38  
39

40 When controlling for demographic and site-level factors, there were no differences in  
41  
42 adoption or de-adoption based on patient age, sex, or comorbidity (Supplemental  
43  
44 Content 4). The odds of adopting LMWH for VTE prophylaxis and de-adopting  
45  
46 albumin for fluid resuscitation were significantly lower for those patients with higher  
47  
48 severity of illness (APACHE II score). The odds of adopting LMWH for VTE  
49  
50 prophylaxis were significantly higher for patients with non-surgical admissions  
51  
52 compared to those with elective surgical admissions (odds ratio = 1.34 (95%  
53  
54  
55  
56  
57  
58  
59  
60

1  
2  
3 confidence interval 1.08-1.66); Supplemental Content 4). There were significant  
4 differences in the odds of adopting LMWH for VTE prophylaxis, and de-adopting  
5 albumin for fluid resuscitation across ICUs (Supplemental Content 4 and 5).  
6  
7  
8  
9

## 10 11 12 **Barriers and facilitators to adopting LMWH for VTE prophylaxis and de-adopting** 13 **albumin for fluid resuscitation** 14

### 15 16 17 Participants

18  
19 83.8% (259 of 309) of participants responded; physicians/NPs (48.3%), nurses  
20 (42.5%), and pharmacists (9.3%). Participants worked in healthcare for a median of  
21 13 years (IQR=7.1-20.0) and in critical care for a median of 8 years (IQR=3.0-15.0;  
22 Supplemental Content 6).  
23  
24  
25  
26  
27

### 28 29 30 31 Knowledge of evidence

32  
33 Most participants reported that LMWH was most effective at preventing deep vein  
34 thrombosis and pulmonary embolism; and that crystalloids were most effective for fluid  
35 resuscitation (Table 1). Perceptions regarding the effectiveness of VTE prophylaxis  
36 varied by professional group, as did perceptions regarding the risks of harm (Table 1).  
37  
38 Perceptions regarding effectiveness of albumin for fluid resuscitation and risks of  
39 harm associated with each form of fluid resuscitation did not vary by professional  
40 group but perceptions regarding the risk of fluid overload did (Table 1).  
41  
42  
43  
44  
45  
46  
47  
48  
49 It was perceived that both best practices were being followed in the ICUs where the  
50 participants practiced (Table 1).  
51  
52  
53  
54  
55  
56  
57  
58  
59  
60



**Table 1.** Knowledge of best practices for VTE prophylaxis and fluid resuscitation

| Survey question                                                                                             | % (N)            |                                     |                             |                                |
|-------------------------------------------------------------------------------------------------------------|------------------|-------------------------------------|-----------------------------|--------------------------------|
|                                                                                                             | Overall<br>N=259 | Physicians/NPs<br>48.3%<br>(N= 125) | Nurses<br>42.5%<br>(N= 110) | Pharmacists<br>9.3%<br>(N= 24) |
| What form(s) of prophylaxis is/are most effective at preventing deep vein thrombosis?*                      |                  |                                     |                             |                                |
| LMWH only                                                                                                   | 59.1 (153)       | 63.2 (79)                           | 51.8 (57)                   | 70.8 (17)                      |
| UFH only                                                                                                    | 4.3 (11)         | 2.4 (3)                             | 7.3 (8)                     | 0.0 (0)                        |
| LMWH & UFH                                                                                                  | 16.2 (42)        | 24.0 (30)                           | 5.5 (6)                     | 25.0 (6)                       |
| Mechanical only                                                                                             | 1.9 (5)          | 0.0 (0)                             | 4.6 (5)                     | 0.0 (0)                        |
| (LMWH or UFH) and Mechanical                                                                                | 15.1 (39)        | 8.0 (10)                            | 25.5 (28)                   | 4.2 (1)                        |
| Unsure only                                                                                                 | 3.5 (9)          | 2.4 (3)                             | 5.5 (6)                     | 0.0 (0)                        |
| What form(s) of prophylaxis is/are most effective at preventing pulmonary embolism? *                       |                  |                                     |                             |                                |
| LMWH only                                                                                                   | 56.8 (147)       | 72.0 (90)                           | 33.6 (37)                   | 83.3 (20)                      |
| UFH only                                                                                                    | 18.2 (47)        | 1.6 (2)                             | 40.9 (45)                   | 0.0 (0)                        |
| LMWH & UFH                                                                                                  | 12.7 (33)        | 20.8 (26)                           | 3.6 (4)                     | 12.5 (3)                       |
| Mechanical only                                                                                             | 0.4 (1)          | 0.0 (0)                             | 0.9 (1)                     | 0.0 (0)                        |
| (LMWH or UFH) & Mechanical                                                                                  | 8.5 (22)         | 3.2 (4)                             | 15.5 (17)                   | 4.2 (1)                        |
| Unsure only                                                                                                 | 3.5 (9)          | 2.4 (3)                             | 5.5 (6)                     | 0.0 (0)                        |
| Which form(s) of prophylaxis is/are most cost effective?*                                                   |                  |                                     |                             |                                |
| LMWH only                                                                                                   | 51.0 (132)       | 70.4 (88)                           | 22.7 (25)                   | 79.2 (19)                      |
| UFH only                                                                                                    | 15.4 (40)        | 12.8 (16)                           | 20.0 (22)                   | 8.3 (2)                        |
| LMWH & UFH                                                                                                  | 4.3 (11)         | 5.6 (7)                             | 0.9 (1)                     | 12.5 (3)                       |
| Mechanical only                                                                                             | 10.0 (26)        | 4.8 (6)                             | 18.2 (20)                   | 0.0 (0)                        |
| (LMWH or UFH) & Mechanical                                                                                  | 2.7 (7)          | 0.0 (0)                             | 6.4 (7)                     | 0.0 (0)                        |
| Unsure only                                                                                                 | 16.6 (43)        | 6.4 (8)                             | 31.8 (35)                   | 0.0 (0)                        |
| Which form(s) of pharmacological prophylaxis has/have the lowest risk of bleeding?†                         |                  |                                     |                             |                                |
| LMWH only                                                                                                   | 57.5 (149)       | 47.2 (59)                           | 69.1 (76)                   | 58.3 (14)                      |
| UFH only                                                                                                    | 24.7 (64)        | 32.8 (41)                           | 18.2 (20)                   | 12.5 (3)                       |
| LMWH & UFH                                                                                                  | 5.0 (13)         | 6.4 (8)                             | 0.0 (0)                     | 20.8 (5)                       |
| Unsure only                                                                                                 | 12.7 (33)        | 13.6 (17)                           | 12.7 (14)                   | 8.3 (2)                        |
| Which form(s) of pharmacological prophylaxis has/have the lowest risk of heparin induced thrombocytopenia?* |                  |                                     |                             |                                |

|                                                                                                                                  |                          |                                              |                                      |                                         |           |
|----------------------------------------------------------------------------------------------------------------------------------|--------------------------|----------------------------------------------|--------------------------------------|-----------------------------------------|-----------|
|                                                                                                                                  | LMWH only                | 86.1 (223)                                   | 94.4 (118)                           | 74.6 (82)                               | 95.8 (23) |
|                                                                                                                                  | UFH only                 | 6.6 (17)                                     | 3.2 (4)                              | 11.8 (13)                               | 0.0 (0)   |
|                                                                                                                                  | LMWH & UFH               | 0.4 (1)                                      | 0.0 (0)                              | 0.0 (0)                                 | 4.2 (1)   |
|                                                                                                                                  | Unsure only              | 7.0 (18)                                     | 2.4 (3)                              | 13.6 (15)                               | 0.0 (0)   |
| To what extent do you think best practices are followed for preventing DVT/PE in your ICU?<br>0=never and 7=always, Median (IQR) |                          |                                              |                                      |                                         |           |
|                                                                                                                                  |                          | 6 (5-6)                                      | 6 (5-6)                              | 6 (6-7)                                 | 6 (5-6)   |
|                                                                                                                                  |                          |                                              |                                      |                                         |           |
| <b>Survey question</b>                                                                                                           | <b>Overall<br/>N=259</b> | <b>Physicians/NPs<br/>48.3%<br/>(N= 125)</b> | <b>Nurses<br/>42.5%<br/>(N= 110)</b> | <b>Pharmacists<br/>9.3%<br/>(N= 24)</b> |           |
| What form(s) of IV fluids is/are most effective for fluid resuscitation? ‡                                                       |                          |                                              |                                      |                                         |           |
|                                                                                                                                  | Albumin only             | 3.5 (9)                                      | 2.4 (3)                              | 5.5 (6)                                 | 0.0 (0)   |
|                                                                                                                                  | Crystalloids only        | 84.2 (218)                                   | 83.2 (104)                           | 82.7 (91)                               | 95.8 (23) |
|                                                                                                                                  | Albumin & Crystalloids   | 8.5 (22)                                     | 9.6 (12)                             | 9.1 (10)                                | 0.0 (0)   |
|                                                                                                                                  | Unsure only              | 3.9 (10)                                     | 4.8 (6)                              | 2.7 (3)                                 | 4.2 (1)   |
| Which form(s) of IV resuscitation fluids are most cost effective? ‡                                                              |                          |                                              |                                      |                                         |           |
|                                                                                                                                  | Albumin only             | 0.4 (1)                                      | 0.0 (0)                              | 0.9 (1)                                 | 0.0 (0)   |
|                                                                                                                                  | Crystalloids only        | 94.6 (245)                                   | 94.4 (118)                           | 95.5 (105)                              | 91.7 (22) |
|                                                                                                                                  | Albumin & Crystalloids   | 0.4 (1)                                      | 0.8 (1)                              | 0.0 (0)                                 | 0.0 (0)   |
|                                                                                                                                  | Unsure only              | 4.6 (12)                                     | 4.8 (6)                              | 3.6 (4)                                 | 8.3 (2)   |
| Which form(s) of IV resuscitation fluids has the lowest risk of fluid overload? *                                                |                          |                                              |                                      |                                         |           |
|                                                                                                                                  | Albumin only             | 47.1 (122)                                   | 32.8 (41)                            | 69.1 (76)                               | 20.8 (5)  |
|                                                                                                                                  | Crystalloids only        | 29.7 (77)                                    | 36.8 (46)                            | 23.6 (26)                               | 20.8 (5)  |
|                                                                                                                                  | Albumin & Crystalloids   | 1.9 (5)                                      | 3.2 (4)                              | 0.0 (0)                                 | 4.2 (1)   |
|                                                                                                                                  | Unsure only              | 21.2 (55)                                    | 27.2 (34)                            | 7.3 (8)                                 | 54.2 (13) |
| Which form(s) of IV resuscitation fluids has the lowest risk of infectious disease? ‡                                            |                          |                                              |                                      |                                         |           |
|                                                                                                                                  | Albumin only             | 2.7 (7)                                      | 1.6 (2)                              | 4.6 (5)                                 | 0.0 (0)   |
|                                                                                                                                  | Crystalloids only        | 86.5 (224)                                   | 87.2 (109)                           | 87.3 (96)                               | 79.2 (19) |
|                                                                                                                                  | Albumin & Crystalloids   | 0.8 (2)                                      | 0.8 (1)                              | 0.9 (1)                                 | 0.0 (0)   |
|                                                                                                                                  | Unsure only              | 10.0 (26)                                    | 10.4 (13)                            | 7.3 (8)                                 | 20.8 (5)  |

1  
2  
3  
4  
5  
6  
7  
8  
9  
10  
11  
12  
13  
14  
15  
16  
17  
18  
19  
20  
21  
22  
23  
24  
25  
26  
27  
28  
29  
30  
31  
32  
33  
34  
35  
36  
37  
38  
39  
40  
41  
42  
43  
44  
45  
46  
47

|                                                                                                                                          |         |         |         |
|------------------------------------------------------------------------------------------------------------------------------------------|---------|---------|---------|
| To what extent do you think best practices are followed for prescribing fluid boluses in your ICU?<br>0=never and 7=always; Median (IQR) |         |         |         |
|                                                                                                                                          | 6 (5-6) | 5 (5-6) | 5 (5-6) |

<sup>1</sup>Evidence suggests the efficacy of LMWH for deep vein thrombosis is similar to or better than UFH.<sup>19,20,24,25</sup> Evidence suggests that LMWH is more efficacious than UFH for preventing pulmonary embolism, has a lower incidence of heparin induced thrombocytopenia, and a similar or lower risk of bleeding.<sup>19,20,24,25</sup>

<sup>2</sup>Evidence suggests that LMWH is more cost effective than UFH.<sup>18</sup>

<sup>3</sup>Evidence suggests that albumin and crystalloids are similarly effective for fluid resuscitation.<sup>21, 24, 25, 26</sup> Evidence suggests that albumin has a higher risk of infectious disease transmission than crystalloids and is less cost-effective than crystalloids.

*Abbreviations: IQR* = interquartile range (p25 - p75), **LMWH** = low molecular weight heparin, **N** = number, **NP** = nurse practitioner, **UFH** = unfractionated heparin, \* = responses varied by professional group (p<0.001), † = responses varied by professional group (p=0.01), ‡ = responses did not vary by professional group (p>0.05)

1  
2  
3  
4  
5 Barriers to adopting LMWH for VTE prophylaxis and de-adopting albumin for fluid  
6 resuscitation  
7

8  
9  
10 Barriers to adoption and de-adoption were reported by 65.2% and 64.9% of  
11 respondents, respectively. The most commonly reported perceived barriers to  
12 adopting LMWH for VTE prophylaxis were insufficient knowledge or understanding,  
13 ICU culture, and no clinical guidelines (Figure 3). The most commonly reported  
14 barriers to de-adopting albumin for fluid resuscitation were a strong clinical preference  
15 of the local clinical leaders in the ICUs, ICU culture, and insufficient knowledge or  
16 understanding (Figure 3). Reported barriers differed between professional groups for  
17 both adoption (Supplemental Content 7) and de-adoption (Supplemental Content 8).  
18  
19  
20  
21  
22  
23  
24  
25  
26  
27  
28  
29

30  
31 Facilitators to adopting LMWH for VTE prophylaxis and de-adopting albumin for fluid  
32 resuscitation  
33

34  
35 On site education and pre-set orders were perceived to be the most commonly  
36 reported facilitator of both adoption and de-adoption (Figure 4). Verbal reminders  
37 from pharmacists to physicians was commonly reported as a perceived facilitator for  
38 adopting LMMH for VTE prophylaxis. A local leader championing the practice was  
39 commonly reported as a perceived facilitator for de-adopting albumin for fluid  
40 resuscitation (Figure 4). There was no variability by professional group.  
41  
42  
43  
44  
45  
46  
47  
48  
49  
50

## 51 **DISCUSSION**

52  
53  
54  
55  
56  
57  
58  
59  
60

1  
2  
3 The present study identified opportunities to improve the adoption of an illustrative  
4 high value practice (LMWH for VTE prophylaxis) and de-adoption of an illustrative low  
5 value practice (albumin for fluid resuscitation). Our audit data demonstrated that  
6 practices do not reflect providers' understanding of the evidence for these practices.  
7  
8 Both adoption and de-adoption of the illustrative example practices were less likely for  
9 patients with greater severity of illness and varied across institutions. The perceived  
10 barriers and facilitators to adoption and de-adoption were broadly similar.  
11  
12  
13  
14  
15  
16  
17  
18  
19  
20

21 Are de-adoption and adoption just the flip-side of the same coin? There is substantial  
22 literature describing the adoption of high value practices, but much less is known  
23 about de-adoption of low value practices; such that even consistent terminology to  
24 describe the process has yet to be agreed upon.<sup>7</sup> Science can inform clinical practice  
25 through discovery resulting in adoption of a new practice, replacement resulting in a  
26 practice update, and reversal resulting in de-adoption of an existing practice. It is only  
27 recently that the last concept, de-adopting low value practices, has been debated in  
28 journals and by professional societies.<sup>13,14,16</sup> The practical implication is that there is  
29 limited evidence to inform whether the barriers and facilitators for adoption and de-  
30 adoption are similar or sufficiently distinct to warrant different approaches.<sup>8,10-12</sup> Our  
31 study adds to the limited evidence base by suggesting that culture or organizational  
32 factors, provider characteristics, and patient characteristics are perceived to be  
33 important barriers and facilitators that may play broadly similar roles in adoption and  
34 de-adoption.<sup>10,11</sup>  
35  
36  
37  
38  
39  
40  
41  
42  
43  
44  
45  
46  
47  
48  
49  
50  
51  
52  
53  
54  
55  
56  
57  
58  
59  
60

1  
2  
3 Knowledge translation (KT) interventions; strategies to improve the synthesis,  
4 dissemination, exchange, and application of evidence to improve health,<sup>4</sup> tailored to  
5 the specific barriers and facilitators of an innovation and the local context are more  
6 likely to effect change.<sup>4,5</sup> Our study provides insight into the perceived barriers and  
7 facilitators of adopting high value practices (LMWH for VTE prophylaxis) and de-  
8 adopting low value practices (albumin for fluid resuscitation) within ICUs, which should  
9 be taken into consideration when designing KT interventions. Interestingly, despite  
10 knowledge of the evidence underlying the illustrative example practices, providers  
11 perceived insufficient knowledge or understanding to be a barrier and perceived  
12 education to be a facilitator to both adopting high value practices and de-adopting low  
13 value practices. These barriers and facilitators are consistent with a systematic review  
14 that suggests the most effective KT interventions in the ICU employ a combination of  
15 education and protocols.<sup>35</sup> While consistent with previous KT studies, this finding is  
16 paradoxical. It is possible that while knowledgeable, providers' confidence in applying  
17 their knowledge clinically was low and they believed education to be the intervention  
18 needed to improve their confidence in applying their knowledge. Furthermore,  
19 confidence in applying new evidence in clinical practice may be particularly  
20 challenging in the care of severely ill patients. This hypothesis is supported by two of  
21 our findings: 1) adoption of LMWH for VTE prophylaxis and de-adoption of albumin for  
22 fluid resuscitation was inversely associated with severity of patient illness and 2)  
23 adoption of LMWH and de-adoption of albumin increased as the patient became more  
24 stable (over ICU stay). Both observations suggest that clinicians may employ  
25 conservative decision-making when caring for sicker patients. The implications are

1  
2  
3 that KT interventions should consider clinician heuristics that are likely to be  
4  
5 influenced by the nature and severity of patient illness.  
6  
7

8  
9  
10 Our study suggests that factors other than knowledge may contribute to the  
11  
12 successful adoption of high value practices and de-adoption of low value practices,  
13  
14 which includes culture, providers, and the innovation. These factors have previously  
15  
16 been identified within the context of the ICU.<sup>36-42</sup> ICU culture and local clinical leader  
17  
18 preferences were among the most commonly endorsed barriers to adopting high  
19  
20 value practices and de-adopting low value practices in this study and in our study as  
21  
22 highlighted by the variation in the adoption of LMWH between sites. Interestingly, this  
23  
24 finding was less pronounced for de-adoption, which has been previously reported.<sup>8</sup>  
25  
26  
27 Culture, also referred to as organizational context, is a frequently cited barrier to  
28  
29 evidence-based medicine and can have a profound effect on clinical practice.<sup>6,43</sup>  
30  
31  
32 However, few studies have systematically evaluated the effect of culture on adopting  
33  
34 high value practices and de-adopting low value practices, and implementation studies  
35  
36 infrequently account for the effect of culture on their practice change interventions.<sup>44</sup>  
37  
38  
39 Similarly, the professional role of the provider is not often contextualized but may be  
40  
41 important (e.g., should pharmacists and nurses be targeted in KT interventions  
42  
43 designed to change the prescribing patterns of physicians and if so how?).<sup>45</sup> This may  
44  
45 be especially relevant as healthcare delivery becomes increasingly multi-professional  
46  
47 and team-based as illustrated in our setting (ICU).  
48  
49  
50  
51  
52  
53  
54  
55  
56  
57  
58  
59  
60

1  
2  
3 The characteristics of innovations themselves may influence change in clinical  
4 practice. Evidence suggests that if the innovation being adopted is congruent with  
5 clinical practice beliefs it can facilitate adoption.<sup>6</sup> Furthermore, the quality, quantity,  
6 and stability of available evidence to support the adoption or de-adoption of an  
7 innovation is likely important.<sup>46</sup> Although most providers in our study were aware of  
8 the evidence to support the adoption of LMWH for VTE prophylaxis and de-adoption  
9 of albumin for fluid resuscitation, they may not have perceived the evidence to be  
10 sufficient to warrant practice change. A growing awareness of challenges with  
11 reproducing scientific evidence and clinician experience with practice reversals<sup>42</sup> may  
12 result in more conservative provider behavior and slower practice change in response  
13 to new evidence. The suboptimal prescribing practices observed in our study likely  
14 represent a combination of all these factors.

15  
16  
17  
18  
19  
20  
21  
22  
23  
24  
25  
26  
27  
28  
29  
30  
31  
32  
33 One limitation of this study is the use of an electronic medical record as the data  
34 source, which provides population-based data, but may not capture all possible  
35 indications for the failure to adopt high value practices and the use of low value  
36 practices (i.e., patient, provider, and organizational factors). Secondly, the survey  
37 used in this study is imperfect. The results of the self-reported survey reflect  
38 perceived modifiers of practice among providers who had knowledge of the evidence  
39 underpinning these two illustrative example practices, rather than factors shown to  
40 influence practice patterns as identified in observational studies.<sup>47</sup> The survey was  
41 purposefully designed to be simple and accessible to garner a representative  
42 perspective from all provider professions and therefore lacks granularity.



1  
2  
3 Nevertheless, the survey has been successfully used for a similar purpose by  
4  
5 others;<sup>33</sup> was reliable and reported to have good clinical sensibility. Thirdly, while this  
6  
7 study was a provincial and multi-site it was constrained to ICUs, which should be  
8  
9 taken into consideration when interpreting our findings beyond this setting.  
10  
11  
12  
13

14  
15 In conclusion, our study provides several insights into similarities and differences  
16  
17 between adoption of high value practices and de-adoption of low value practices. Both  
18  
19 adoption and de-adoption of the illustrative practices did not reflect healthcare  
20  
21 providers' knowledge of the evidence. Both adoption and de-adoption of the were  
22  
23 less likely for patients with greater severity of illness and varied across institutions. We  
24  
25 found that perceived barriers and facilitators are more similar than different between  
26  
27 adoption and de-adoption, which suggests existing behavior change frameworks for  
28  
29 adopting high value practices may also be applicable for de-adopting low value  
30  
31 practices.  
32  
33  
34  
35  
36

### 37 **ACKNOWLEDGEMENTS**

38  
39  
40 KMS would like to acknowledge salary support from the O'Brien Institute for Public  
41  
42 Health & Ward of the 21<sup>st</sup> Century within the Cumming School of Medicine at the  
43  
44 University of Calgary, and the Canadian Institutes of Health Research. SB is  
45  
46 supported by a Canada Research Chair in Critical Care Nephrology. DJC holds a  
47  
48 Canada Research Chair in Knowledge Translation in the ICU. HTS is supported by a  
49  
50 Population Health Investigator Award from Alberta Innovates and an Embedded  
51  
52 Clinician Researcher Award from the Canadian Institutes of Health Research.  
53  
54  
55  
56  
57  
58  
59  
60

## **FUNDING**

This work was supported by a Partnership for Research and Innovation in Health Systems grant awarded by Alberta Innovates (Grant #201309 [HTS and SMB]).

## **DISCLOSURE OF CONFLICT OF INTERESTS**

The authors declare that they have no competing interests.

## **AUTHORS' CONTRIBUTIONS**

Dr. Sauro contributed to the design and conceptualization of the study; analysis and interpretation of the data, drafting and revising the manuscript and gave approval of the final version of the manuscript. No conflicts of interest to declare.

Dr. Bagshaw contributed to the design and conceptualization of the study, interpretation of the data, providing feedback on the manuscript, and gave approval of the final version of the manuscript. No conflicts of interest to declare.

Dr. Niven contributed to the design and conceptualization of the study, interpretation of the data, providing feedback on the manuscript, and gave approval of the final version of the manuscript. No conflicts of interest to declare.

1  
2  
3 Dr. Soo contributed to the analysis and interpretation of the data, providing feedback  
4  
5 on the manuscript and gave approval of the final version of the manuscript. No  
6  
7 conflicts of interest to declare.  
8  
9

10  
11  
12 Ms. Brundin-Mather contributed to the interpretation of the data, providing feedback  
13  
14 on the manuscript, and gave approval of the final version of the manuscript. No  
15  
16 conflicts of interest to declare.  
17  
18

19  
20  
21 Dr. Parsons Leigh contributed to the design and conceptualization of the study,  
22  
23 interpretation of the data, providing feedback on the manuscript, and gave approval of  
24  
25 the final version of the manuscript. No conflicts of interest to declare.  
26  
27

28  
29  
30 Dr. Cook contributed to the design and conceptualization of the study, interpretation of  
31  
32 the data, providing feedback on the manuscript, and gave approval of the final version  
33  
34 of the manuscript. No conflicts of interest to declare.  
35  
36

37  
38  
39 Dr. Stelfox contributed to the design and conceptualization of the study, interpretation  
40  
41 of the data, providing feedback on the manuscript, and gave approval of the final  
42  
43 version of the manuscript. No conflicts of interest to declare.  
44  
45  
46  
47  
48  
49  
50  
51  
52  
53  
54  
55  
56  
57  
58  
59  
60

## References

1. Institute of Medicine. Crossing the Quality Chiasm. Washington, DC: 2001.
2. Morris ZS, Wooding S, Grant J. The answer is 17 years, what is the question: understanding time lags in translational research. *J R Soc Med*. 2011;104:510-20.
3. Rogers EM. Lessons for guidelines from the diffusion of innovations. *Jt Comm J Qual Improv*. 1995;21:324-8.
4. Graham ID, Logan J, Harrison MB, et al. Lost in knowledge translation: time for a map? *J Contin Educ Health Prof*. 2006;26:13-24.
5. McCormack B, Kitson A, Harvey G, et al. Getting evidence into practice: the meaning of 'context'. *J Adv Nurs*. 2002;38:94-104.
6. Cabana MD, Rand CS, Powe NR, et al. Why don't physicians follow clinical practice guidelines? A framework for improvement. *Jama*. 1999;282:1458-65.
7. Niven DJ, Mrklas KJ, Holodinsky JK, et al. Towards understanding the de-adoption of low-value clinical practices: a scoping review. *BMC Med*. 2015;13:255.
8. van Bodegom-Vos L, Davidoff F, Marang-van de Mheen PJ. Implementation and de-implementation: two sides of the same coin? *BMJ Qual Saf*. 2017;26:495-501.
9. Rogers EM. The innovation-decision process. *Diffusion of Innovations*. 5 ed. New York, NY: Free Press; 2003.
10. Prasad V, Ioannidis JP. Evidence-based de-implementation for contradicted, unproven, and aspiring healthcare practices. *Implement Sci*. 2014;9:1.
11. Montini T, Graham ID. "Entrenched practices and other biases": unpacking the historical, economic, professional, and social resistance to de-implementation. *Implement Sci*. 2015;10:24.
12. Davidoff F. On the undiffusion of established practices. *JAMA Intern Med*. 2015;175:809-11.
13. Choosing Wisely Canada [January 16, 2017]. Available from: <http://www.choosingwiselycanada.org/>.
14. Choosing Wisely [January 16, 2017]. Available from: <http://www.choosingwisely.org/>.
15. Macleod MR, Michie S, Roberts I, et al. Biomedical research: increasing value, reducing waste. *Lancet*. 2014;383:101-4.
16. Grady D, Redberg RF. Less is more: how less health care can result in better health. *Arch Intern Med*. 2010;170:749-50.
17. Stelfox HT, Niven DJ, Clement FM, et al. Stakeholder Engagement to Identify Priorities for Improving the Quality and Value of Critical Care. *PLoS One*. 2015;10:e0140141.
18. Fowler RA, Mittmann N, Geerts W, et al. Cost-effectiveness of dalteparin vs unfractionated heparin for the prevention of venous thromboembolism in critically ill patients. *Jama*. 2014;312:2135-45.
19. PROTECT Investigators. Dalteparin versus Unfractionated Heparin in Critically Ill Patients. *New England Journal of Medicine*. 2011;364:1305-14.
20. Alhazzani W, Lim W, Jaeschke RZ, et al. Heparin thromboprophylaxis in medical-surgical critically ill patients: a systematic review and meta-analysis of randomized trials. *Crit Care Med*. 2013;41:2088-98.

- 1
- 2
- 3
- 4 21. Rhodes A, Evans LE, Alhazzani W, et al. Surviving Sepsis Campaign: International Guidelines for Management of Sepsis and Septic Shock: 2016. *Critical Care Medicine*. 2017;45:486-552.
- 5
- 6 22. Alberta Health Services. Venous thromboembolism prophylaxis: Clinical practice guideline (2016).
- 7
- 8 23. Finfer S, Bellomo R, Boyce N, et al. A comparison of albumin and saline for fluid resuscitation in the intensive care unit. *N Engl J Med*. 2004;350:2247-56.
- 9
- 10 24. Hirsh J, Raschke R. Heparin and low-molecular-weight heparin: the Seventh ACCP Conference on Antithrombotic and Thrombolytic Therapy. *Chest*. 2004;126:188s-203s.
- 11
- 12 25. Li G, Cook DJ, Levine MA, et al. Competing Risk Analysis for Evaluation of Dalteparin Versus Unfractionated Heparin for Venous Thromboembolism in Medical-Surgical Critically Ill Patients. *Medicine (Baltimore)*. 2015;94:e1479.
- 13
- 14 26. Lyu PF, Hockenberry JM, Gaydos LM, et al. Impact of a Sequential Intervention on Albumin Utilization in Critical Care. *Crit Care Med*. 2016;44:1307-13.
- 15
- 16 27. Navickis RJ, Greenhalgh DG, Wilkes MM. Albumin in Burn Shock Resuscitation: A Meta-Analysis of Controlled Clinical Studies. *J Burn Care Res*. 2016;37:e268-78.
- 17
- 18 28. Patel A, Laffan MA, Waheed U, et al. Randomised trials of human albumin for adults with sepsis: systematic review and meta-analysis with trial sequential analysis of all-cause mortality. *Bmj*. 2014;349:g4561.
- 19
- 20 29. EASL clinical practice guidelines on the management of ascites, spontaneous bacterial peritonitis, and hepatorenal syndrome in cirrhosis. *J Hepatol*. 2010;53:397-417.
- 21
- 22 30. Bernardi M, Caraceni P, Navickis RJ, et al. Albumin infusion in patients undergoing large-volume paracentesis: a meta-analysis of randomized trials. *Hepatology*. 2012;55:1172-81.
- 23
- 24 31. Cavallin M, Kamath PS, Merli M, et al. Terlipressin plus albumin versus midodrine and octreotide plus albumin in the treatment of hepatorenal syndrome: A randomized trial. *Hepatology*. 2015;62:567-74.
- 25
- 26 32. Salerno F, Navickis RJ, Wilkes MM. Albumin infusion improves outcomes of patients with spontaneous bacterial peritonitis: a meta-analysis of randomized trials. *Clin Gastroenterol Hepatol*. 2013;11:123-30.e1.
- 27
- 28 33. Cook D, Duffett M, Lauzier F, et al. Barriers and facilitators of thromboprophylaxis for medical-surgical intensive care unit patients: a multicenter survey. *J Crit Care*. 2014;29:471.e1-9.
- 29
- 30 34. Parsons Leigh J, Niven DJ, Boyd JM, et al. Developing a framework to guide the de-adoption of low-value clinical practices in acute care medicine: a study protocol. *BMC Health Serv Res*. 2017;17:54.
- 31
- 32 35. Sinuff T, Muscedere J, Adhikari NK, et al. Knowledge translation interventions for critically ill patients: a systematic review\*. *Crit Care Med*. 2013;41:2627-40.
- 33
- 34 36. Gershengorn HB, Wunsch H. Understanding changes in established practice: pulmonary artery catheter use in critically ill patients. *Crit Care Med*. 2013;41:2667-76.
- 35
- 36 37. Koo KK, Sun JC, Zhou Q, et al. Pulmonary artery catheters: evolving rates and reasons for use. *Crit Care Med*. 2011;39:1613-8.
- 37
- 38
- 39
- 40
- 41
- 42
- 43
- 44
- 45
- 46
- 47
- 48
- 49
- 50
- 51
- 52
- 53
- 54
- 55
- 56
- 57
- 58
- 59
- 60

- 1  
2  
3 38. Murphy DJ, Needham DM, Netzer G, et al. RBC transfusion practices among  
4 critically ill patients: has evidence changed practice? *Crit Care Med*. 2013;41:2344-53.  
5 39. Wiener RS, Welch HG. Trends in the use of the pulmonary artery catheter in  
6 the United States, 1993-2004. *Jama*. 2007;298:423-9.  
7 40. Munshi L, Gershengorn HB, Fan E, et al. Adjuvants to Mechanical Ventilation  
8 for Acute Respiratory Failure. Adoption, De-adoption, and Factors Associated with  
9 Selection. *Ann Am Thorac Soc*. 2017;14:94-102.  
10 41. Kahn JM, Le TQ. Adoption and de-adoption of drotrecogin alfa for severe  
11 sepsis in the United States. *J Crit Care*. 2016;32:114-9.  
12 42. Niven DJ, Rubenfeld GD, Kramer AA, et al. Effect of published scientific  
13 evidence on glycemic control in adult intensive care units. *JAMA Intern Med*.  
14 2015;175:801-9.  
15 43. Melnyk BM. Culture Eats Strategy Every Time: What Works in Building and  
16 Sustaining an Evidence-Based Practice Culture in Healthcare Systems. *Worldviews  
17 Evid Based Nurs*. 2016;13:99-101.  
18 44. Dodek P, Cahill NE, Heyland DK. The relationship between organizational  
19 culture and implementation of clinical practice guidelines: a narrative review. *JPEN J  
20 Parenter Enteral Nutr*. 2010;34:669-74.  
21 45. Menear M, Grindrod K, Clouston K, et al. Advancing knowledge translation in  
22 primary care. *Can Fam Physician*. 2012;58:623-7, e302-7.  
23 46. Scott IA, Elshaug AG. Foregoing low-value care: how much evidence is  
24 needed to change beliefs? *Intern Med J*. 2013;43:107-9.  
25 47. Lauzier F, Muscedere J, Deland E, et al. Thromboprophylaxis patterns and  
26 determinants in critically ill patients: a multicenter audit. *Crit Care*. 2014;18:R82.  
27  
28  
29  
30  
31  
32  
33  
34  
35  
36  
37  
38  
39  
40  
41  
42  
43  
44  
45  
46  
47  
48  
49  
50  
51  
52  
53  
54  
55  
56  
57  
58  
59  
60

1  
2  
3  
4 **Figure 1.** The flow of patients into the ICU and into the adoption and de-adoption  
5 cohorts.  
6

7  
8 *Abbreviations:* ICU: intensive care unit; VTE: venous thromboembolism; LMWH:  
9 low molecular weight heparin  
10  
11  
12  
13  
14  
15  
16  
17  
18  
19  
20  
21  
22  
23  
24  
25  
26  
27  
28  
29  
30  
31  
32  
33  
34  
35  
36  
37  
38  
39  
40  
41  
42  
43  
44  
45  
46  
47  
48  
49  
50  
51  
52  
53  
54  
55  
56  
57  
58  
59  
60

1  
2  
3 **Figure 2.** The proportion of patients receiving mechanical, unfractionated, and  
4 low molecular weight heparin for venous thromboembolism prophylaxis over time  
5  
6  
7  
8 (by intensive care unit patient day).  
9  
10  
11  
12  
13  
14  
15  
16  
17  
18  
19  
20  
21  
22  
23  
24  
25  
26  
27  
28  
29  
30  
31  
32  
33  
34  
35  
36  
37  
38  
39  
40  
41  
42  
43  
44  
45  
46  
47  
48  
49  
50  
51  
52  
53  
54  
55  
56  
57  
58  
59  
60

For peer review only



1  
2  
3 **Figure 3.** Barriers to the adoption of high value practices (low molecular weight  
4 heparin for venous thromboembolism prophylaxis) and de-adoption of low value  
5 practices (albumin for fluid resuscitation)  
6  
7  
8  
9  
10  
11  
12  
13  
14  
15  
16  
17  
18  
19  
20  
21  
22  
23  
24  
25  
26  
27  
28  
29  
30  
31  
32  
33  
34  
35  
36  
37  
38  
39  
40  
41  
42  
43  
44  
45  
46  
47  
48  
49  
50  
51  
52  
53  
54  
55  
56  
57  
58  
59  
60

For peer review only

1  
2  
3 **Figure 4.** Facilitators to the adoption of high value practices (low molecular  
4 weight heparin for venous thromboembolism prophylaxis) and de-adoption of low  
5 value practices (albumin for fluid resuscitation).  
6  
7  
8  
9  
10  
11  
12  
13  
14  
15  
16  
17  
18  
19  
20  
21  
22  
23  
24  
25  
26  
27  
28  
29  
30  
31  
32  
33  
34  
35  
36  
37  
38  
39  
40  
41  
42  
43  
44  
45  
46  
47  
48  
49  
50  
51  
52  
53  
54  
55  
56  
57  
58  
59  
60

For peer review only

1  
2  
3  
4  
5  
6  
7  
8  
9  
10  
11  
12  
13  
14  
15  
16  
17  
18  
19  
20  
21  
22  
23  
24  
25  
26  
27  
28  
29  
30  
31  
32  
33  
34  
35  
36  
37  
38  
39  
40  
41  
42  
43  
44  
45  
46  
47  
48  
49  
50  
51  
52  
53  
54  
55  
56  
57  
58  
59  
60

**Figure 1. Flow of patients**

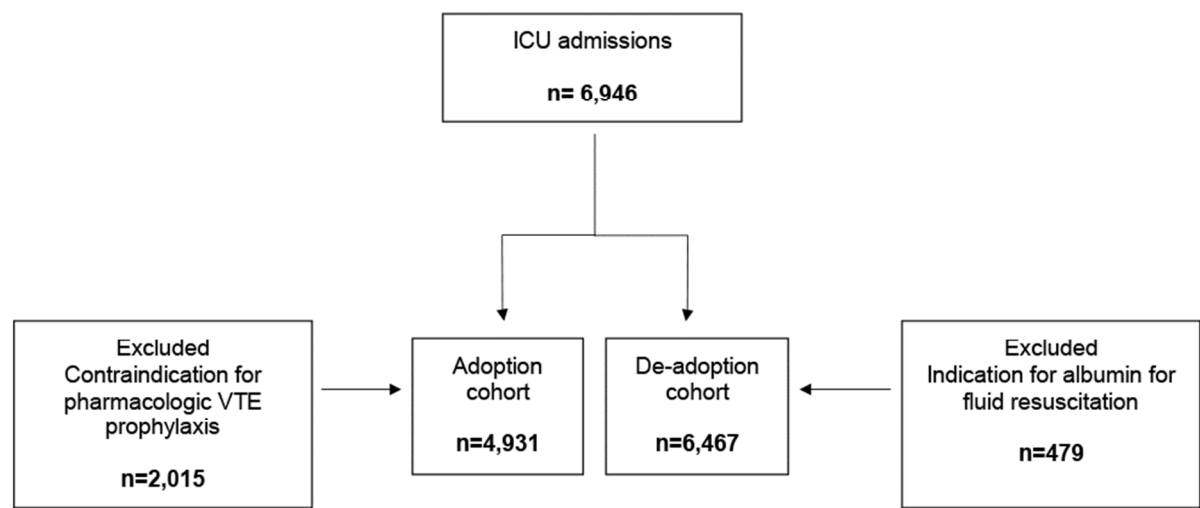

*Footnote:* Adoption cohort = Recommended to receive LMWH for VTE prophylaxis; de-adoption cohort = Recommended to NOT receive albumin for fluid resuscitation

For review only

**Figure 1.** Venous thromboembolism prophylaxis by intensive care unit patient day

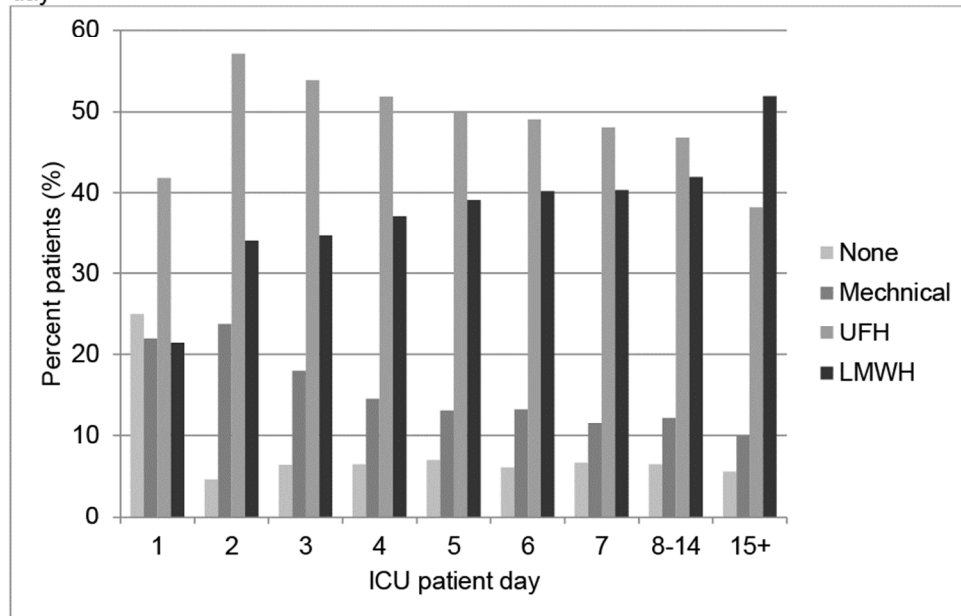

*Footnote:* Percent of patients may add to greater than 100% because patients may have received more than one form of venous thromboembolism prophylaxis on a given patient day.

*Abbreviation:* ICU=intensive care unit, LMWH=low molecular weight heparin, UFH=unfractionated heparin

EW Only

1  
2  
3  
4  
5  
6  
7  
8  
9  
10  
11  
12  
13  
14  
15  
16  
17  
18  
19  
20  
21  
22  
23  
24  
25  
26  
27  
28  
29  
30  
31  
32  
33  
34  
35  
36  
37  
38  
39  
40  
41  
42  
43  
44  
45  
46  
47  
48  
49  
50  
51  
52  
53  
54  
55  
56  
57  
58  
59  
60

**Figure 3.** Barriers to the adoption of high value practices (low molecular weight heparin for venous thromboembolism prophylaxis) and de-adoption of low value practices (albumin for fluid resuscitation)

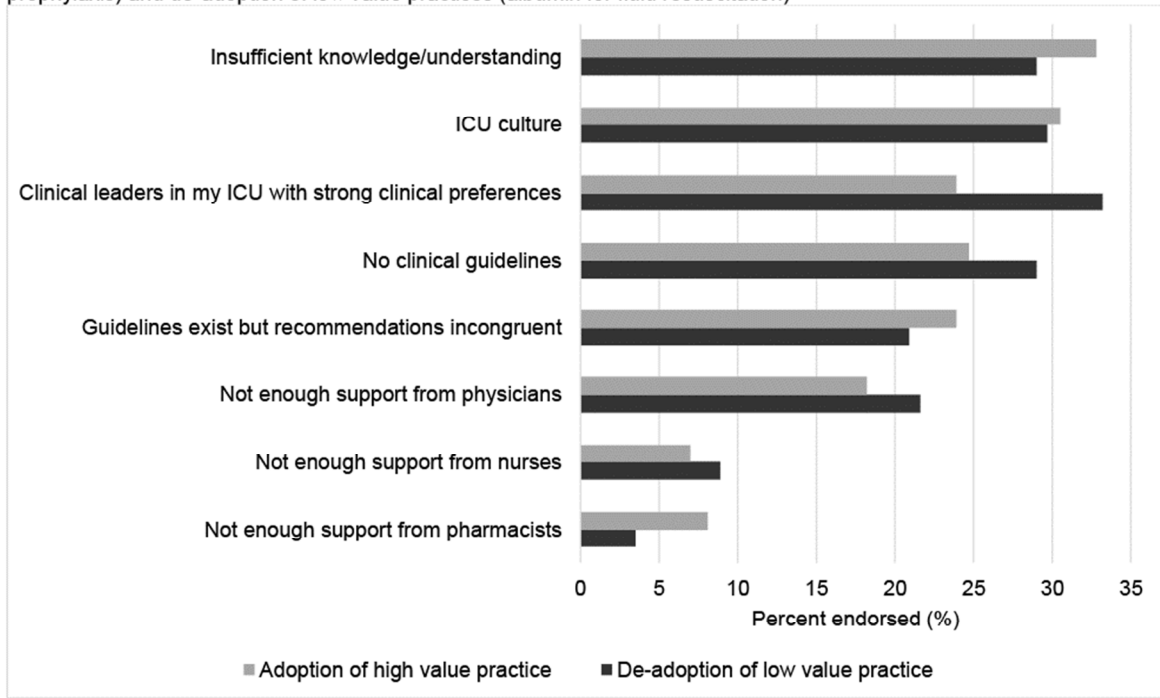

Review only

**Figure 4.** Facilitators to the adoption of high value practices (low molecular weight heparin for venous thromboembolism prophylaxis) and de-adoption of low value practices (albumin for fluid resuscitation)

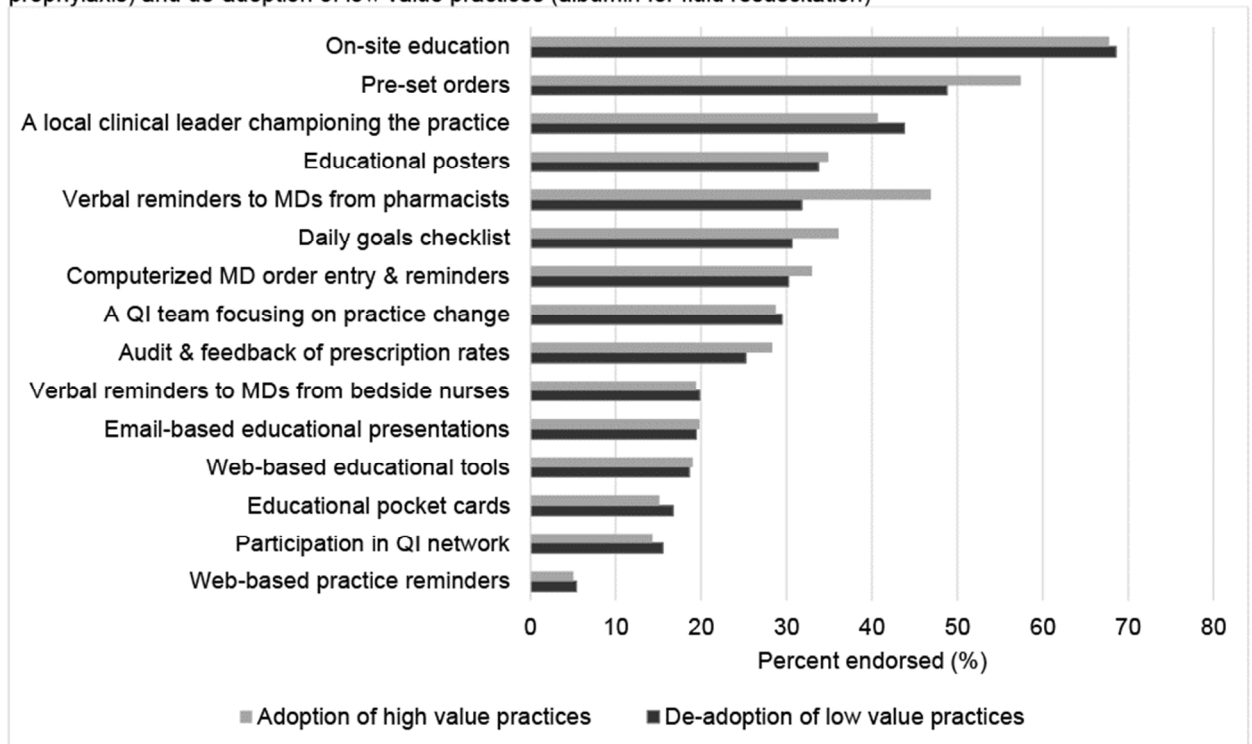

Abbreviation: MD=medical doctor, QI=quality improvement

EW Only

1  
2  
3  
4  
5  
6  
7  
8  
9  
10  
11  
12  
13  
14  
15  
16  
17  
18  
19  
20  
21  
22  
23  
24  
25  
26  
27  
28  
29  
30  
31  
32  
33  
34  
35  
36  
37  
38  
39  
40  
41  
42  
43  
44  
45  
46  
47  
48  
49  
50  
51  
52  
53  
54  
55  
56  
57  
58  
59  
60

Figure 1. Flow of patients

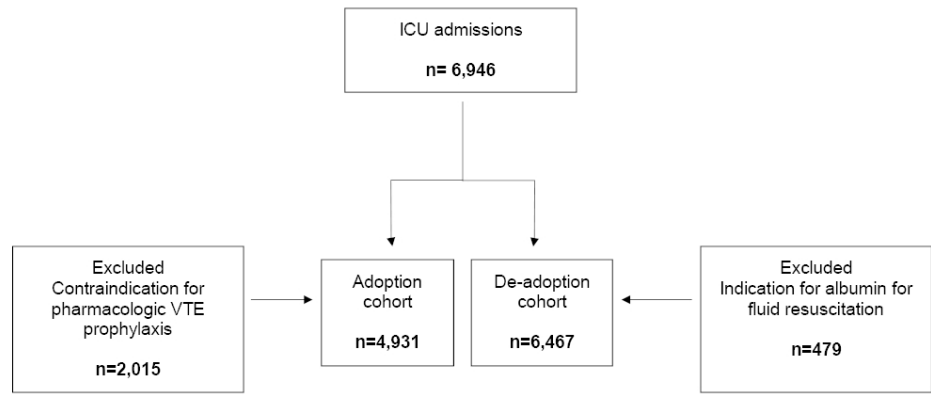

Footnote: Adoption cohort = Recommended to receive LMWH for VTE prophylaxis; de-adoption cohort = Recommended to NOT receive albumin for fluid resuscitation

Figure 1. The flow of patients into the ICU and into the adoption and de-adoption cohorts. Abbreviations: ICU: intensive care unit; VTE: venous thromboembolism; LMWH: low molecular weight heparin

90x50mm (300 x 300 DPI)

**Figure 1.** Venous thromboembolism prophylaxis by intensive care unit patient day

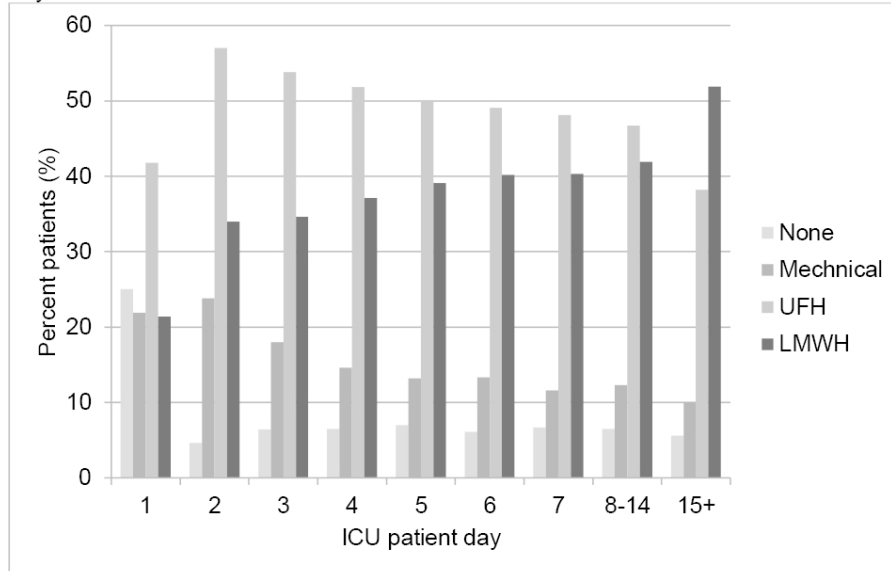

*Footnote:* Percent of patients may add to greater than 100% because patients may have received more than one form of venous thromboembolism prophylaxis on a given patient day.

*Abbreviation:* ICU=intensive care unit, LMWH=low molecular weight heparin, UFH=unfractionated heparin

**Figure 2.** The proportion of patients receiving mechanical, unfractionated, and low molecular weight heparin for venous thromboembolism prophylaxis over time (by intensive care unit patient day).

90x80mm (300 x 300 DPI)



**Figure 3.** Barriers to the adoption of high value practices (low molecular weight heparin for venous thromboembolism prophylaxis) and de-adoption of low value practices (albumin for fluid resuscitation)

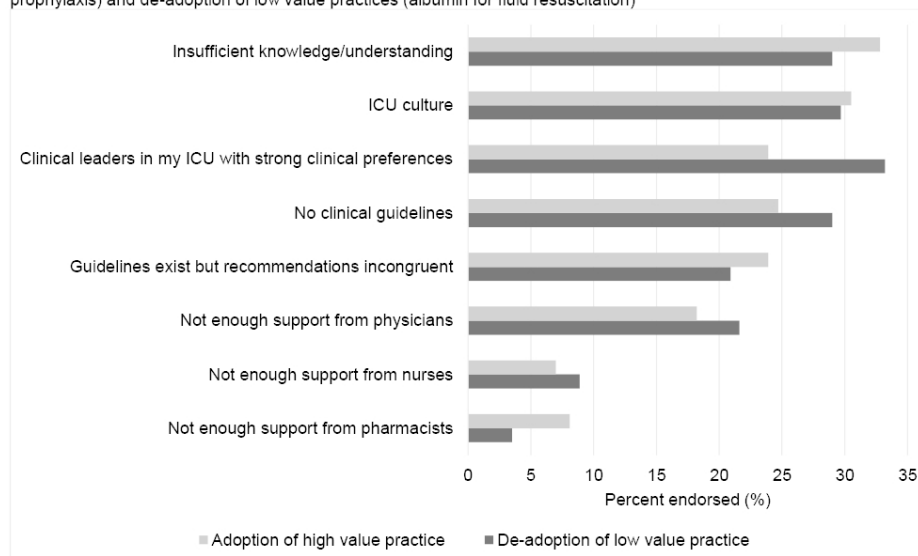

Figure 3. Barriers to the adoption of high value practices (low molecular weight heparin for venous thromboembolism prophylaxis) and de-adoption of low value practices (albumin for fluid resuscitation)

90x60mm (300 x 300 DPI)

**Figure 4.** Facilitators to the adoption of high value practices (low molecular weight heparin for venous thromboembolism prophylaxis) and de-adoption of low value practices (albumin for fluid resuscitation)

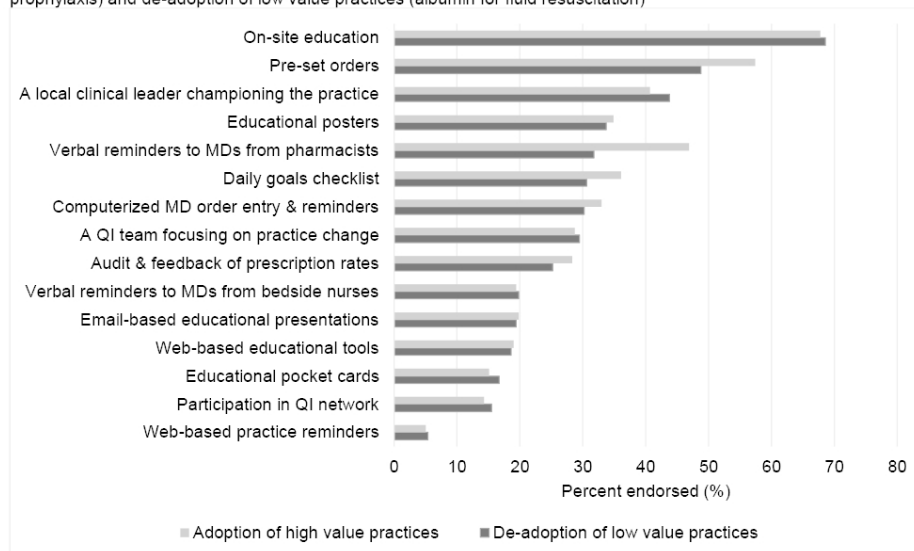

Abbreviation: MD=medical doctor, QI=quality improvement

Figure 4. Facilitators to the adoption of high value practices (low molecular weight heparin for venous thromboembolism prophylaxis) and de-adoption of low value practices (albumin for fluid resuscitation).

90x63mm (300 x 300 DPI)

**Supplemental Digital Content 1.** List of diagnoses with a potential contraindication to receive pharmacological venous thromboembolism prophylaxis or indication for therapeutic anticoagulation\*

|                                                            |
|------------------------------------------------------------|
| Arteriovenous malformation, surgery for                    |
| Embolus, pulmonary                                         |
| GI Vascular insufficiency                                  |
| Grafts, removal of infected vascular                       |
| Neoplasm, neurologic                                       |
| Neoplasm-cranial, surgery for (excluding transphenoidal)   |
| Neoplasm-spinal cord surgery or other related procedures   |
| Neurologic surgery, other                                  |
| Subarachnoid hemorrhage/intracranial aneurysm              |
| Subarachnoid hemorrhage/intracranial aneurysm, surgery for |
| Thrombosis, vascular (deep vein)                           |
| Transphenoidal surgery                                     |
| Ulcer disease, peptic                                      |
| Abdomen only trauma                                        |
| Abdomen only trauma, surgery for                           |
| Abdomen/extremity trauma                                   |
| Abdomen/extremity trauma, surgery for                      |
| Abdomen/face trauma                                        |
| Abdomen/face trauma, surgery for                           |
| Abdomen/multiple trauma                                    |
| Abdomen/multiple trauma, surgery for                       |
| Abdomen/pelvis trauma, surgery for                         |
| Abscess/infection-cranial, surgery for                     |
| Anastomosis, vascular                                      |
| Aneurysm, abdominal aortic                                 |
| Aneurysm, abdominal aortic; with dissection                |
| Aneurysm, abdominal aortic; with rupture                   |
| Aneurysm, dissecting aortic                                |
| Aneurysm, thoracic aortic                                  |
| Aneurysm, thoracic aortic; with dissection                 |
| Aneurysm, thoracic aortic; with rupture                    |
| Aneurysm/pseudoaneurysm, other                             |
| Aneurysms, repair of other (except ventricular)            |
| Biopsy, brain                                              |
| Bleeding, GI from esophageal varices/portal hypertension   |
| Bleeding, GI-location unknown                              |
| Bleeding, lower GI                                         |
| Bleeding, upper GI                                         |
| Bleeding-lower GI, surgery for                             |
| Bleeding-other GI, surgery for                             |
| Bleeding-upper GI, surgery for                             |

|    |                                                                                                                                                                                    |
|----|------------------------------------------------------------------------------------------------------------------------------------------------------------------------------------|
| 1  |                                                                                                                                                                                    |
| 2  |                                                                                                                                                                                    |
| 3  | Burr hole placement                                                                                                                                                                |
| 4  | CABG alone, coronary artery bypass grafting                                                                                                                                        |
| 5  | CVA, cerebrovascular accident/stroke                                                                                                                                               |
| 6  | Chest/abdomen trauma                                                                                                                                                               |
| 7  | Chest/abdomen trauma, surgery for                                                                                                                                                  |
| 8  | Chest/extremity trauma                                                                                                                                                             |
| 9  | Chest/extremity trauma, surgery for                                                                                                                                                |
| 10 | Chest/face trauma                                                                                                                                                                  |
| 11 | Chest/face trauma, surgery for                                                                                                                                                     |
| 12 | Chest/multiple trauma                                                                                                                                                              |
| 13 | Chest/multiple trauma, surgery for                                                                                                                                                 |
| 14 | Chest/pelvis trauma                                                                                                                                                                |
| 15 | Chest/pelvis trauma, surgery for                                                                                                                                                   |
| 16 | Chest/spinal trauma                                                                                                                                                                |
| 17 | Chest/spinal trauma, surgery for                                                                                                                                                   |
| 18 | Chest/thorax only trauma                                                                                                                                                           |
| 19 | Chest/thorax only trauma, surgery for                                                                                                                                              |
| 20 | Coagulopathy                                                                                                                                                                       |
| 21 | Complications of prev. peripheral vasc. surgery, surgery for (i.e.ligation of bleeder, exploration and evacuation of hematoma, debridement, pseudoaneurysms, clots, fistula, etc.) |
| 22 | Complications of previous GI surgery; surgery for (anastomotic leak, bleeding, abscess, infection, dehiscence, etc.)                                                               |
| 23 | Complications of previous spinal cord surgery, surgery for                                                                                                                         |
| 24 | Cranioplasty and complications from previous craniotomies                                                                                                                          |
| 25 | Head (CNS) only trauma                                                                                                                                                             |
| 26 | Head (CNS) only trauma, surgery for                                                                                                                                                |
| 27 | Head/abdomen trauma                                                                                                                                                                |
| 28 | Head/abdomen trauma, surgery for                                                                                                                                                   |
| 29 | Head/chest trauma                                                                                                                                                                  |
| 30 | Head/chest trauma, surgery for                                                                                                                                                     |
| 31 | Head/extremity trauma                                                                                                                                                              |
| 32 | Head/extremity trauma, surgery for                                                                                                                                                 |
| 33 | Head/face trauma                                                                                                                                                                   |
| 34 | Head/face trauma, surgery for                                                                                                                                                      |
| 35 | Head/multiple trauma                                                                                                                                                               |
| 36 | Head/multiple trauma, surgery for                                                                                                                                                  |
| 37 | Head/pelvis trauma                                                                                                                                                                 |
| 38 | Head/pelvis trauma, surgery for                                                                                                                                                    |
| 39 | Head/spinal trauma                                                                                                                                                                 |
| 40 | Head/spinal trauma, surgery for                                                                                                                                                    |
| 41 | Hematoma, epidural                                                                                                                                                                 |
| 42 | Hematoma, epidural, surgery for                                                                                                                                                    |
| 43 | Hematoma, subdural                                                                                                                                                                 |
| 44 | Hematoma, subdural, surgery for                                                                                                                                                    |
| 45 |                                                                                                                                                                                    |
| 46 |                                                                                                                                                                                    |
| 47 |                                                                                                                                                                                    |
| 48 |                                                                                                                                                                                    |
| 49 |                                                                                                                                                                                    |
| 50 |                                                                                                                                                                                    |
| 51 |                                                                                                                                                                                    |
| 52 |                                                                                                                                                                                    |
| 53 |                                                                                                                                                                                    |
| 54 |                                                                                                                                                                                    |
| 55 |                                                                                                                                                                                    |
| 56 |                                                                                                                                                                                    |
| 57 |                                                                                                                                                                                    |
| 58 |                                                                                                                                                                                    |
| 59 |                                                                                                                                                                                    |
| 60 |                                                                                                                                                                                    |

|    |                                                                             |
|----|-----------------------------------------------------------------------------|
| 1  |                                                                             |
| 2  |                                                                             |
| 3  | Hematomas                                                                   |
| 4  | Hemorrhage (for gastrointestinal bleeding GI-see GI system) (for trauma see |
| 5  | Trauma)                                                                     |
| 6  |                                                                             |
| 7  | Hemorrhage, intra/retroperitoneal                                           |
| 8  | Hemorrhage, postpartum (female only)                                        |
| 9  | Hemorrhage/hematoma, intracranial                                           |
| 10 | Hemorrhage/hematoma-intracranial, surgery for                               |
| 11 | Hemorrhage/hemoptysis, pulmonary                                            |
| 12 |                                                                             |
| 13 | Hemothorax                                                                  |
| 14 | Pelvis/extremity trauma                                                     |
| 15 | Pelvis/extremity trauma, surgery for                                        |
| 16 | Pelvis/face trauma                                                          |
| 17 | Pelvis/hip only trauma, surgery for                                         |
| 18 | Pelvis/multiple trauma, surgery for                                         |
| 19 |                                                                             |
| 20 | Pelvis/spinal trauma                                                        |
| 21 | Pericardial effusion/tamponade                                              |
| 22 | Renal bleeding                                                              |
| 23 | Spinal cord only trauma, surgery for                                        |
| 24 | Spinal cord surgery, other                                                  |
| 25 |                                                                             |
| 26 | Stereotactic procedure                                                      |
| 27 | Subarachnoid hemorrhage/arteriovenous malformation                          |
| 28 | Tamponade, pericardial                                                      |

29  
30  
31  
32  
33  
34  
35  
36  
37  
38  
39  
40  
41  
42  
43  
44  
45  
46  
47  
48  
49  
50  
51  
52  
53  
54  
55  
56  
57  
58  
59  
60

*\*Footnote:* The primary diagnoses were reviewed independently by two ICU physicians (HTS, DJN). The two ICU physicians provided their judgment to establish a conservative list of primary diagnoses in order to exclude patients that may have a contraindication for pharmacological VTE prophylaxis based on bleeding risk and an indication for therapeutic anticoagulation. Discrepancies were resolved by discussion.

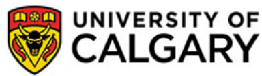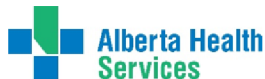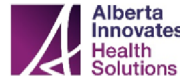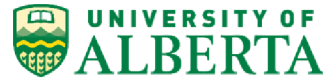

## Adopting Best Practices in DVT/PE Prophylaxis and Fluid Resuscitation in Critical Care

[http://fluidsurveys.com/s/ECG\\_facilitators\\_barriers\\_survey/](http://fluidsurveys.com/s/ECG_facilitators_barriers_survey/)

### **Informed Consent**

This survey is to identify and evaluate barriers to, and facilitators of, best practices in:

1. Deep Vein Thrombosis (DVT) / Pulmonary Embolism (PE) prophylaxis for medical-surgical ICU patients, and
2. Fluid Resuscitation for medical-surgical ICU patients *without* liver disease, bacterial peritonitis, hepatorenal syndrome or therapeutic paracentesis.

**This survey is not about trauma, neurosurgery or cardiac surgery patients.** Survey responses will be used to develop interventions to facilitate the adoption of best practices in Alberta ICUs.

You are being asked to take part in this survey because you are a healthcare professional working in adult critical care in Alberta. Our survey can be answered in approximately **5 minutes**. There are no direct benefits and/or risks to your participation.

Survey respondents can choose to have their name entered into a draw for *\$20 Starbucks gift cards* (one name will be drawn per week; non-winners will remain in the draw each week).

Your participation in this survey is voluntary and you are free to stop at any time. Your responses will be kept confidential. Your de-identified data will be stored in a password-protected database, and responses will only be presented in aggregate. The survey has peer-reviewed funding and has received ethics approval from the University of Calgary. **Your decision to complete and submit this survey will indicate your consent to participate.** Should you decide to withdraw your participation before submitting the survey, your data will be deleted.

If you have questions about this survey or your participation, please contact:

Rebecca Brundin-Mather, Research Coordinator, at [brundin@ucalgary.ca](mailto:brundin@ucalgary.ca).

If you have questions about your rights as a participant, you may contact the University of Calgary Conjoint Research Ethics Board at (403) 220-7990. This office is not affiliated with the study team.

Thank you in advance for taking the time to complete the survey!

Kind regards,

Tom Stelfox, MD, PhD, FRCPC

Intensive Care Physician

Scientific Director, AHS, Critical Care Strategic Clinical Network

---

I agree to participate in this survey       I do **NOT** wish to participate in this survey (online-version)

## Demographics

### 1. What is your professional group?

- ICU physician       Nurse Clinician       Pharmacist  
 ICU resident       Nurse Educator       Other: \_\_\_\_\_  
 ICU fellow       Bedside Nurse

### 2. Approximately how many years have you worked in:

Health care       Critical care

### 3. In which hospital(s) do you primarily work? (Select all that apply)

- Chinook Regional Hospital  
 Foothills Medical Centre  
 Grand Prairie QE II Hospital  
 Grey Nuns Hospital  
 Medicine Hat Regional Hospital  
 Misericordia Hospital  
 Northern Lights Regional Health Centre  
 Peter Lougheed Centre  
 Red Deer Regional Hospital  
 Rockyview General Hospital  
 Royal Alexander Hospital  
 South Health Campus  
 Sturgeon Community Hospital  
 University of Alberta Hospital

**DVT/PE Prevention**

We are interested in your perceptions of the different forms of prophylaxes commonly used to prevent Deep Vein Thrombosis (DVT) and Pulmonary Embolism (PE) in medical-surgical ICU patients (not trauma, neurosurgery or cardiac surgery patients). Common prophylaxes include:

- Low molecular weight heparin (**LMWH** e.g., Enoxaparin, Dalteparin, Tinzaparin)
- Unfractionated heparin (**UFH**, regular Heparin)
- **Mechanical** prophylaxis (i.e., sequential compression devices)

We appreciate that practices vary across units and providers. For each of the following questions, please select the **best response option** OR **options**, to the best of your knowledge (more than one response option can be selected).

4. Which form(s) of prophylaxis is/are most effective at preventing:

|                            | LMWH                     | UFH                      | Mechanical               | Unsure                   |
|----------------------------|--------------------------|--------------------------|--------------------------|--------------------------|
| Deep Vein Thrombosis (DVT) | <input type="checkbox"/> | <input type="checkbox"/> | <input type="checkbox"/> | <input type="checkbox"/> |
| Pulmonary Embolism (PE)    | <input type="checkbox"/> | <input type="checkbox"/> | <input type="checkbox"/> | <input type="checkbox"/> |

5. Which form(s) of prophylaxis is/are most cost-effective?

| LMWH                     | UFH                      | Mechanical               | Unsure                   |
|--------------------------|--------------------------|--------------------------|--------------------------|
| <input type="checkbox"/> | <input type="checkbox"/> | <input type="checkbox"/> | <input type="checkbox"/> |

6. Which form(s) of *pharmacological* prophylaxis has/have the lowest risk of:

|                                        | LMWH                     | UFH                      | Unsure                   |
|----------------------------------------|--------------------------|--------------------------|--------------------------|
| Bleeding                               | <input type="checkbox"/> | <input type="checkbox"/> | <input type="checkbox"/> |
| Heparin Induced Thrombocytopenia (HIT) | <input type="checkbox"/> | <input type="checkbox"/> | <input type="checkbox"/> |

7. To what extent do you think best practices for preventing DVT/PE are followed in your ICU (i.e., the patient receives the right prophylaxis with the right dose at the right time)?

|                       |                       |                       |                       |                       |                       |                       |                       |
|-----------------------|-----------------------|-----------------------|-----------------------|-----------------------|-----------------------|-----------------------|-----------------------|
| <input type="radio"/> |
| <b>1</b>              | <b>2</b>              | <b>3</b>              | <b>4</b>              | <b>5</b>              | <b>6</b>              | <b>7</b>              | Unsure                |
| <b>Never</b>          | <b>Sometimes</b>      |                       |                       | <b>Always</b>         |                       |                       |                       |



## **Intravenous Fluid Resuscitation**

We are now interested in your perceptions of the different types of intravenous fluids commonly used for fluid resuscitation (i.e., fluid boluses) in the ICU for medical-surgical patients, **excluding** patients with liver disease, bacterial peritonitis, or undergoing therapeutic paracentesis as they may have different fluid needs. Common resuscitation fluids include:

- **Human Albumin** (Albumin 5% or Albumin 25%)
- **Crystalloid solutions** (e.g., normal saline, ringers lactate, and plasma-lyte)

Again, we appreciate that clinical practices vary across units and providers. For each of the following questions, please select the **best response option** OR **options**, to the best of your knowledge (more than one response option can be selected).

8. Which form(s) of IV resuscitation fluid is/are most effective for resuscitation?

Albumin                       Crystalloids                       Unsure

9. Which form(s) of IV resuscitation fluid(s) is/are most cost-effective?

Albumin                       Crystalloids                       Unsure

10. Which form(s) of IV resuscitation fluid(s) has/have the lowest risk of:

|                                         | Albumin                  | Crystalloids             | Unsure                   |
|-----------------------------------------|--------------------------|--------------------------|--------------------------|
| Fluid overload (peripheral / pulmonary) | <input type="checkbox"/> | <input type="checkbox"/> | <input type="checkbox"/> |
| Contracting an infectious disease       | <input type="checkbox"/> | <input type="checkbox"/> | <input type="checkbox"/> |

11. To what extent do you think *best practices* for prescribing fluid boluses are followed **in your ICU** (i.e., the patient receives the right fluid with the right dose at the right time)?

|                       |                       |                       |                       |                       |                       |                       |                       |
|-----------------------|-----------------------|-----------------------|-----------------------|-----------------------|-----------------------|-----------------------|-----------------------|
| <input type="radio"/> |
| <b>1</b>              | <b>2</b>              | <b>3</b>              | <b>4</b>              | <b>5</b>              | <b>6</b>              | <b>7</b>              | Unsure                |
| <b>Never</b>          |                       |                       | <b>Sometimes</b>      |                       |                       | <b>Always</b>         |                       |

**Barriers to Best Practices**

A number of ICU or ‘systems’ factors have been identified as potential barriers to best practices. We are interested in what you think are barriers **in your ICU** to prescribing:

1. LMWH over UFH for DVT/PE prophylaxis
2. Crystalloid solutions over Albumin for fluid resuscitation

12. Which of the following factors are current barriers in your ICU to prescribing...

|                                                                                                                                  | LMWH over UFH         |                       | Crystalloids over Albumin |                       |
|----------------------------------------------------------------------------------------------------------------------------------|-----------------------|-----------------------|---------------------------|-----------------------|
|                                                                                                                                  | Current Barrier       | Unsure                | Current Barrier           | Unsure                |
| An ICU culture with an unclear or slow process for practice change                                                               | <input type="radio"/> | <input type="radio"/> | <input type="radio"/>     | <input type="radio"/> |
| Not enough support from physicians                                                                                               | <input type="radio"/> | <input type="radio"/> | <input type="radio"/>     | <input type="radio"/> |
| Not enough support from nurses                                                                                                   | <input type="radio"/> | <input type="radio"/> | <input type="radio"/>     | <input type="radio"/> |
| Not enough support from pharmacists                                                                                              | <input type="radio"/> | <input type="radio"/> | <input type="radio"/>     | <input type="radio"/> |
| Clinical leaders in my ICU with strong clinical preferences                                                                      | <input type="radio"/> | <input type="radio"/> | <input type="radio"/>     | <input type="radio"/> |
| No clinical guidelines or orders sets in my ICU to guide the practice                                                            | <input type="radio"/> | <input type="radio"/> | <input type="radio"/>     | <input type="radio"/> |
| Guidelines exist in my ICU, but they do not recommend LMWH over UFH / crystalloids over albumin                                  | <input type="radio"/> | <input type="radio"/> | <input type="radio"/>     | <input type="radio"/> |
| Insufficient knowledge/understanding the evidence base for the practice.                                                         | <input type="radio"/> | <input type="radio"/> | <input type="radio"/>     | <input type="radio"/> |
| <b>None</b> of the above factors are current barriers in my ICU to prescribing....                                               | <input type="radio"/> |                       | <input type="radio"/>     |                       |
| Please note any other factors that may be barriers to prescribing LMWH over UFH and/or crystalloids over albumin. Specify below. |                       |                       |                           |                       |

### **Strategies to Encourage Best Practices**

A number of strategies have been identified as potential facilitators to changing clinical practice. We are interested in your perceptions of different strategies that have been used to encourage:

1. LMWH over UFH for DVT/PE prophylaxis
2. Crystalloid solutions over Albumin for fluid resuscitation

13. Which of the following strategies are currently used in your ICU to encourage...

|                                                                                  | <b>LMWH over UFH</b>  | <b>Crystalloids over Albumin</b> |
|----------------------------------------------------------------------------------|-----------------------|----------------------------------|
| 1. On-site education (in-services, rounds, journal clubs, orientations)          | <input type="radio"/> | <input type="radio"/>            |
| 2. Educational posters (in the unit)                                             | <input type="radio"/> | <input type="radio"/>            |
| 3. Educational pocket cards                                                      | <input type="radio"/> | <input type="radio"/>            |
| 4. Email-based educational presentations                                         | <input type="radio"/> | <input type="radio"/>            |
| 5. Web-based educational tools                                                   | <input type="radio"/> | <input type="radio"/>            |
| 6. Verbal reminders to physicians from pharmacists                               | <input type="radio"/> | <input type="radio"/>            |
| 7. Verbal reminders to physicians from bedside nurses                            | <input type="radio"/> | <input type="radio"/>            |
| 8. Pre-set orders                                                                | <input type="radio"/> | <input type="radio"/>            |
| 9. Computerized physician order entry & reminders                                | <input type="radio"/> | <input type="radio"/>            |
| 10. Web-based practice reminders                                                 | <input type="radio"/> | <input type="radio"/>            |
| 11. Daily goals checklist                                                        | <input type="radio"/> | <input type="radio"/>            |
| 12. Audit & feedback of prescription rates                                       | <input type="radio"/> | <input type="radio"/>            |
| 13. A quality improvement team focusing on practice change                       | <input type="radio"/> | <input type="radio"/>            |
| 14. Participation in a quality improvement network                               | <input type="radio"/> | <input type="radio"/>            |
| 15. A local clinical leader championing the practice                             | <input type="radio"/> | <input type="radio"/>            |
| 16. Other strategy used. Please specify:                                         | <input type="radio"/> | <input type="radio"/>            |
| 17. Other strategy used. Please specify:                                         | <input type="radio"/> | <input type="radio"/>            |
| <b>NO</b> strategies are currently being used in my ICU encourage this practice: | <input type="radio"/> | <input type="radio"/>            |

1  
2  
3  
4  
5  
6  
7  
8  
9  
10  
11  
12  
13  
14  
15  
16  
17  
18  
19  
20  
21  
22  
23  
24  
25  
26  
27  
28  
29  
30  
31  
32  
33  
34  
35  
36  
37  
38  
39  
40  
41  
42  
43  
44  
45  
46  
47  
48  
49  
50  
51  
52  
53  
54  
55  
56  
57  
58  
59  
60

14. From the same list of strategies, please select the **5 best strategies** that you believe would work **in your ICU** to encourage:

(1) LMWH over UFH for DVT/PE prophylaxis

(2) Crystalloid solutions over Albumin for fluid resuscitation

(Select up to 5 strategies, regardless whether the strategy is used in your ICU or not)

**Select up to 5 in each column**

| Strategy to change clinical practice                                    | LMWH over UFH            | Crystalloids over Albumin |
|-------------------------------------------------------------------------|--------------------------|---------------------------|
| 1. On-site education (in-services, rounds, journal clubs, orientations) | <input type="checkbox"/> | <input type="checkbox"/>  |
| 2. Educational posters (in the unit)                                    | <input type="checkbox"/> | <input type="checkbox"/>  |
| 3. Educational pocket cards                                             | <input type="checkbox"/> | <input type="checkbox"/>  |
| 4. Email-based educational presentations                                | <input type="checkbox"/> | <input type="checkbox"/>  |
| 5. Web-based educational tools                                          | <input type="checkbox"/> | <input type="checkbox"/>  |
| 6. Verbal reminders to physicians from pharmacists                      | <input type="checkbox"/> | <input type="checkbox"/>  |
| 7. Verbal reminders to physicians from bedside nurses                   | <input type="checkbox"/> | <input type="checkbox"/>  |
| 8. Pre-set orders                                                       | <input type="checkbox"/> | <input type="checkbox"/>  |
| 9. Computerized physician order entry & reminders                       | <input type="checkbox"/> | <input type="checkbox"/>  |
| 10. Web-based practice reminders                                        | <input type="checkbox"/> | <input type="checkbox"/>  |
| 11. Daily goals checklist                                               | <input type="checkbox"/> | <input type="checkbox"/>  |
| 12. Audit & feedback of prescription rates                              | <input type="checkbox"/> | <input type="checkbox"/>  |
| 13. A quality improvement team to focus on practice change              | <input type="checkbox"/> | <input type="checkbox"/>  |
| 14. Participation in a quality improvement network                      | <input type="checkbox"/> | <input type="checkbox"/>  |
| 15. A local clinical leader to champion the practice                    | <input type="checkbox"/> | <input type="checkbox"/>  |
| 16. Other strategy. Please specify:                                     | <input type="checkbox"/> | <input type="checkbox"/>  |
| 17. Other strategy. Please specify:                                     | <input type="checkbox"/> | <input type="checkbox"/>  |

1  
2  
3 15. Finally, please provide any additional comments in the text box below.  
4  
5

6  
7  
8  
9  
10  
11  
12

13  
14  
15 Please select the check box(es) below to have your name entered in the Starbucks coffee card  
16 draws and/or to receive the study results.  
17  
18

- 19  Yes, I would like my name entered in the coffee card draws.  
20  
21  Yes, I would like to receive the results from this study.  
22  
23  
24

25 My email address is:  
26

27  
28 N.B. E-mail addresses will be kept confidential and will not be used to contact you for any  
29 reason other than those noted above.  
30

31  
32

33  
34  
35

36 ---End of Survey ---  
37  
38

39  
40 **Thank you for helping us improve care!**  
41  
42

43 **Please return completed surveys to:**  
44

45 Dr. Tom Stelfox  
46 Department of Critical Care Medicine  
47 Foothills Medical Centre  
48

49 **OR**

45 Rebecca Brundin-Mather  
46 Ward of the 21<sup>st</sup> Century  
47 GD01 Teaching, Research, Wellness Bldg  
48 University of Calgary, 3280 Hospital Dr NW  
49 Calgary, AB T2N 4Z6  
50  
51  
52

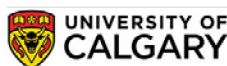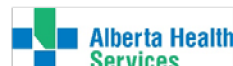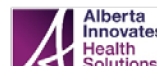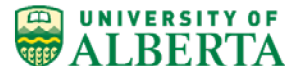

**Supplemental Digital Content 3.** Intensive care unit patient characteristics for the study period (January 1, 2014-December 31, 2014)

| <b>Demographic variable</b>     | <b>Population<br/>(N=6,946)</b> | <b>Adoption cohort<br/>70.7%<br/>(N=4,931)</b> | <b>De-adoption<br/>cohort<br/>93.1%<br/>(N=6,467)</b> |
|---------------------------------|---------------------------------|------------------------------------------------|-------------------------------------------------------|
| Age, median (IQR)               | 60 (46-71)                      | 61 (47-71)                                     | 61 (46-71)                                            |
| Female                          | 41.6 (2,888)                    | 43.3 (2,134)                                   | 41.8 (2,703)                                          |
| Comorbidities                   |                                 |                                                |                                                       |
| AIDS                            | 0.6 (42)                        | 0.7 (33)                                       | 0.5 (35)                                              |
| Chronic dialysis                | 3.5 (240)                       | 3.8 (186)                                      | 3.5 (225)                                             |
| Chronic heart failure           | 6.4 (444)                       | 7.4 (364)                                      | 6.5 (419)                                             |
| Cirrhosis                       | 5.9 (407)                       | 6.0 (294)                                      | 0.0 (0)                                               |
| Diabetes                        | 19.7 (1,366)                    | 21.6 (1,065)                                   | 19.9 (1,284)                                          |
| Hepatic failure                 | 3.9 (269)                       | 4.1 (203)                                      | 0.0 (0)                                               |
| Immune suppression              | 8.5 (589)                       | 9.4 (463)                                      | 8.2 (532)                                             |
| Leukemia or multiple<br>myeloma | 1.3 (88)                        | 1.4 (69)                                       | 1.3 (86)                                              |
| Lymphoma                        | 1.1 (77)                        | 1.2 (61)                                       | 1.2 (75)                                              |
| Metastatic cancer               | 3.9 (272)                       | 4.1 (203)                                      | 4.1 (262)                                             |
| Respiratory insufficiency       | 12.0 (833)                      | 14.6 (722)                                     | 12.5 (810)                                            |
| Any comorbidity                 | 44.6 (3,100)                    | 49.3 (2,431)                                   | 40.6 (2,625)                                          |
| Admitted from                   |                                 |                                                |                                                       |
| Emergency department            | 36.6 (2,540)                    | 36.7 (1,808)                                   | 36.5 (2,358)                                          |
| Operating / recovery room       | 21.9 (1,520)                    | 18.3 (902)                                     | 22.2 (1,437)                                          |
| Hospital ward                   | 26.7 (1,858)                    | 28.1 (1,386)                                   | 26.3 (1,702)                                          |
| Other hospital                  | 10.4 (722)                      | 11.9 (589)                                     | 10.5 (677)                                            |
| Other location                  | 4.3 (300)                       | 4.9 (243)                                      | 4.5 (288)                                             |
| Unknown                         | 0.1 (6)                         | 0.1 (3)                                        | 0.1 (5)                                               |
| Admission type                  |                                 |                                                |                                                       |

|                                                         |                 |                 |                 |
|---------------------------------------------------------|-----------------|-----------------|-----------------|
| Elective surgery                                        | 9.4 (655)       | 8.1 (399)       | 9.5 (614)       |
| Emergent surgery                                        | 16.8 (1,170)    | 13.8 (681)      | 17.3 (1,120)    |
| No surgery                                              | 73.1 (5,078)    | 78.1 (3,851)    | 72.5 (4,690)    |
| Unknown                                                 | 0.6 (43)        | 0.0 (0)         | 0.7 (43)        |
| Reason for ICU admission                                |                 |                 |                 |
| Medical                                                 | 59.9 (4,163)    | 69.4 (3,420)    | 58.7 (3,797)    |
| Surgical                                                | 25.8 (1,789)    | 24.1 (1,190)    | 26.2 (1,696)    |
| Neurological                                            | 9.3 (649)       | 4.1 (200)       | 9.8 (632)       |
| Trauma                                                  | 4.3 (302)       | 2.5 (121)       | 4.6 (299)       |
| Unknown                                                 | 0.6 (43)        | 0.0 (0)         | 0.7 (43)        |
| APACHE II Score on ICU admission, median (IQR)          | 19 (14-26)      | 20 (15-26)      | 19 (14-25)      |
| Glasgow Coma Scale score on ICU admission, median (IQR) | 14 (11-15)      | 14 (11-15)      | 14 (11-15)      |
| Intubation                                              | 65.5 (4,553)    | 66.2 (3,264)    | 64.9 (4,195)    |
| Invasive ventilation                                    | 68.3 (4,747)    | 68.8 (3,393)    | 67.8 (4,387)    |
| Duration, median hours (IQR)                            | 51 (18-133)     | 62 (25-143)     | 50 (18-132)     |
| Non-invasive ventilation                                | 13.1 (913)      | 16.2 (798)      | 13.6 (878)      |
| Duration, median hours (IQR)                            | 24 (8-63)       | 28 (9-68)       | 24 (6-65)       |
| ICU length of stay, median days (IQR)                   | 3.7 (1.8-7.7)   | 4.3 (2.4-8.3)   | 3.7 (1.8-7.6)   |
| Hospital length of stay, median days (IQR)              | 13.3 (6.1-29.5) | 13.9 (6.8-30.0) | 13.2 (6.1-29.3) |
| ICU mortality                                           | 14.1 (981)      | 12.2 (601)      | 12.9 (837)      |
| Hospital mortality                                      | 21.0 (1,462)    | 19.9 (979)      | 19.5 (1,260)    |

**Abbreviations:** **AIDS**=autoimmune deficiency syndrome, **APACHE II**=Acute Physiology and Chronic Health Evaluation II, **ICU**=intensive care unit, **IQR**=interquartile range,

**Supplemental Digital Content 4.** Association between demographic and site-level factors, and adoption and de-adoption

|                                  | Adoption cohort<br>OR (95% CI)* | De-adoption cohort<br>OR (95% CI)** |
|----------------------------------|---------------------------------|-------------------------------------|
| Age                              | NS <sup>†</sup>                 | 0.999 (0.999-1.00)                  |
| Female                           | NS <sup>†</sup>                 | NS <sup>†</sup>                     |
| Any comorbidity                  | NS <sup>†</sup>                 | NS <sup>†</sup>                     |
| Admission type                   |                                 |                                     |
| Elective surgery                 | 1.00 (reference group)          | 1.00 (reference group)              |
| Emergent surgery                 | 1.19 (0.92-1.53)                | 0.92 (0.88-0.95)                    |
| No surgery                       | 1.34 (1.08-1.66)                | 1.02 (0.98-1.05)                    |
| APACHE II Score on ICU admission | 0.958 (0.951-0.965)             | 0.989 (0.988-0.990)                 |
| Site                             |                                 |                                     |
| C1                               | 1.00 (reference group)          | 1.00 (reference group)              |
| C2                               | 1.32 (1.07-1.64)                | 0.96 (0.92-1.00)                    |
| C3                               | 1.13 (0.89-1.46)                | 0.98 (0.94-1.03)                    |
| C4                               | 1.48 (1.15-1.90)                | 0.98 (0.93-1.02)                    |
| E1                               | 2.12 (1.66-2.73)                | 0.90 (0.86-0.95)                    |
| E2                               | 0.86 (0.71-1.05)                | 0.90 (0.87-0.92)                    |
| E3                               | 7.26 (5.46-9.65)                | 0.92 (0.87-0.97)                    |
| E4                               | 0.76 (0.63-0.92)                | 0.88 (0.85-0.91)                    |
| E5                               | 1.61 (1.23-2.10)                | 0.75 (0.72-0.79)                    |

*Footnote:* all “C” sites indicate ICU in Calgary and all “E” sites indicate ICU in Edmonton

\*Used a multivariable generalized estimating equations (GEEs) logistic regression model with exchangeable correlation structure given daily measurements (clustering by patient); appropriate use considered “use of LMWH”

\*\*Used standard multivariable logistic regression model given single measurement per patient; “appropriate use” considered “not using albumin”

<sup>†</sup>NS = non-significant, removed from model



**Supplemental Digital Content 5.** The use of high value practices (low molecular weight heparin for venous thromboembolism prophylaxis) and the use of low value practices (albumin for fluid resuscitation) by study intensive care unit

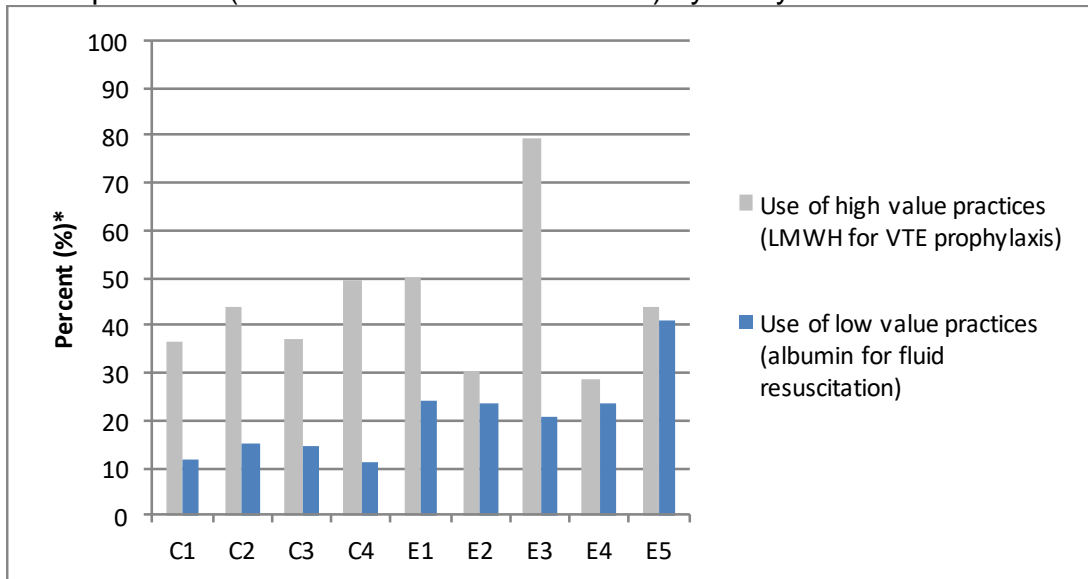

*Footnote:* all "C" sites indicate ICU in Calgary and all "E" sites indicate ICU in Edmonton

\*% of patient-days for VTE prophylaxis and % of patients for albumin

**Supplemental Digital Content 6. Survey participant characteristics**

| <b>Professional group</b>         | <b>% (N)</b>        |
|-----------------------------------|---------------------|
| Attending physician               | 24.7 (64)           |
| Fellow                            | 6.2 (16)            |
| Resident                          | 12.4 (32)           |
| Nurse practitioner                | 5.0 (13)            |
| Nurse manager / charge nurse      | 10.0 (26)           |
| Nurse educator                    | 8.5 (22)            |
| Bedside nurse                     | 23.9 (62)           |
| Pharmacist                        | 9.3 (24)            |
| <b>Years worked in ICU</b>        | <b>Median (IQR)</b> |
| Attending physician               | 14.0 (9.8-22.0)     |
| Clinical fellow                   | 1.8 (1.0-2.3)       |
| Resident                          | 0.3 (0.1-1.0)       |
| Nurse practitioner                | 15.0 (9.0-20.0)     |
| Nurse manager / charge nurse      | 11.5 (7.3-18.8)     |
| Nurse educator                    | 19.0 (10.3-21.5)    |
| Bedside nurse                     | 7.5 (2.5-12.0)      |
| Pharmacist                        | 5.3 (3.0-10.8)      |
| <b>Years worked in healthcare</b> | <b>Median (IQR)</b> |
| Attending physician               | 19.0 (14.8-25.3)    |
| Clinical fellow                   | 8.0 (7.0-9.5)       |
| Resident                          | 3.0 (2.0-5.1)       |
| Nurse practitioner                | 15.0 (12.0-25.0)    |
| Nurse manager / charge nurse      | 16.5 (12.5-24.0)    |
| Nurse educator                    | 21.0 (13.0-26.0)    |
| Bedside nurse                     | 10.0 (6.0-16.0)     |
| Pharmacist                        | 10.5 (6.1-14.3)     |

1  
2  
3  
4  
5  
6  
7  
8  
9  
10  
11  
12  
13  
14  
15  
16  
17  
18  
19  
20  
21  
22  
23  
24  
25  
26  
27  
28  
29  
30  
31  
32  
33  
34  
35  
36  
37  
38  
39  
40  
41  
42  
43  
44  
45  
46  
47

**Supplemental Digital Content 7.** Barriers to the adoption of high value practices (low molecular weight heparin for venous thromboembolism prophylaxis) by professional group

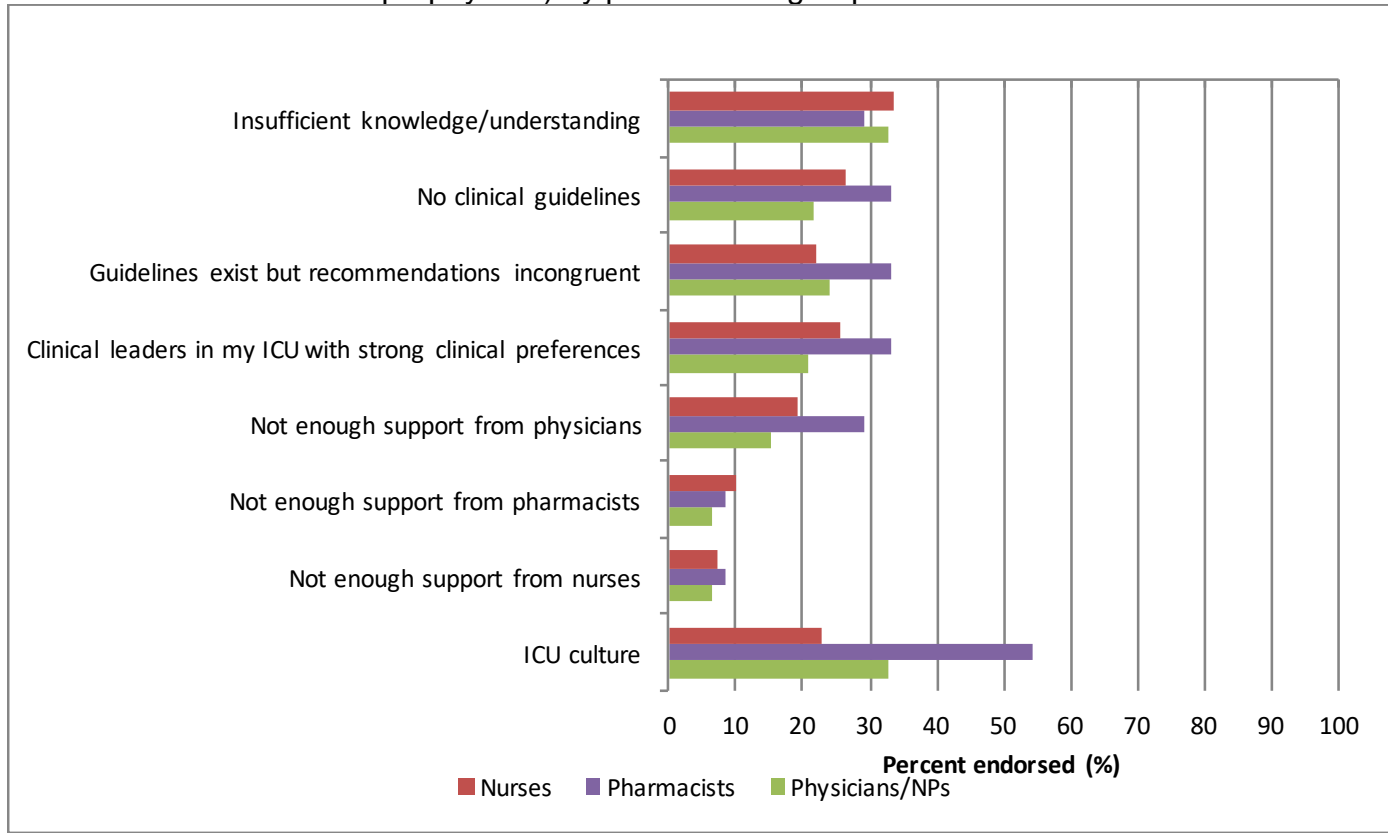

Abbreviations: ICU=intensive care unit, NP=nurse practitioner

**Supplemental Digital Content 8.** Barriers to the de-adoption of low value practices (albumin for fluid resuscitation) by professional group

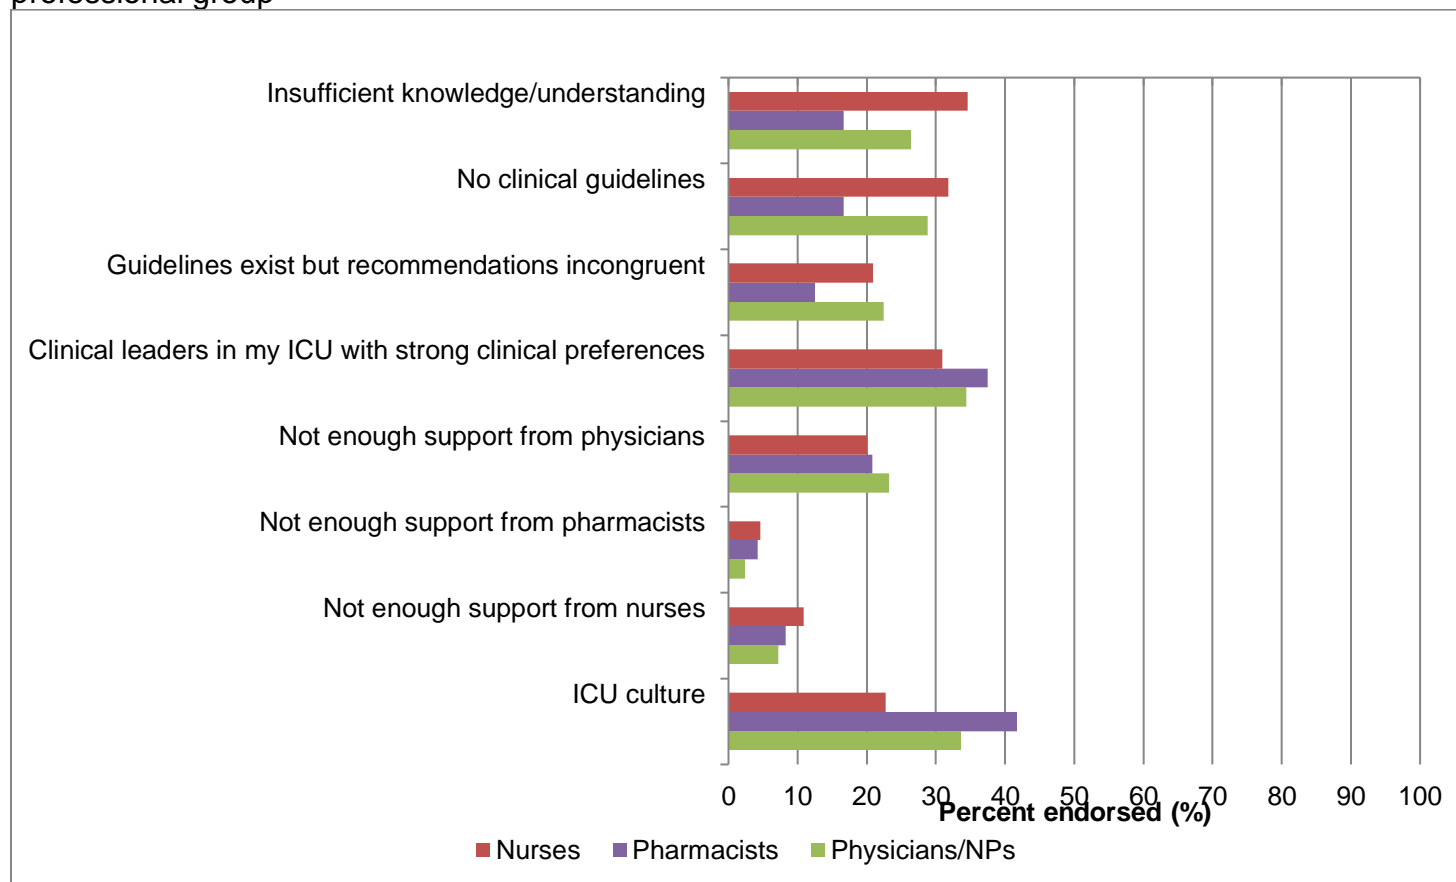

Abbreviations: **ICU**=intensive care unit, **NP**=nurse practitioner

# Reporting checklist for quality improvement study.

Based on the SQUIRE guidelines.

## Instructions to authors

Complete this checklist by entering the page numbers from your manuscript where readers will find each of the items listed below.

Your article may not currently address all the items on the checklist. Please modify your text to include the missing information. If you are certain that an item does not apply, please write "n/a" and provide a short explanation.

Upload your completed checklist as an extra file when you submit to a journal.

In your methods section, say that you used the SQUIRE reporting guidelines, and cite them as:

Ogrinc G, Davies L, Goodman D, Batalden P, Davidoff F, Stevens D. SQUIRE 2.0 (Standards for QUality Improvement Reporting Excellence): revised publication guidelines from a detailed consensus process

|                     | Reporting Item                                                                                                                                                                                                                                      | Page Number |
|---------------------|-----------------------------------------------------------------------------------------------------------------------------------------------------------------------------------------------------------------------------------------------------|-------------|
|                     | <a href="#">#1</a> Indicate that the manuscript concerns an initiative to improve healthcare (broadly defined to include the quality, safety, effectiveness, patientcenteredness, timeliness, cost, efficiency, and equity of healthcare)           | 1           |
|                     | <a href="#">#02a</a> Provide adequate information to aid in searching and indexing                                                                                                                                                                  | 3           |
|                     | <a href="#">#02b</a> Summarize all key information from various sections of the text using the abstract format of the intended publication or a structured summary such as: background, local problem, methods, interventions, results, conclusions | 2 & 3       |
| Problem description | <a href="#">#3</a> Nature and significance of the local problem                                                                                                                                                                                     | 5           |
| Available knowledge | <a href="#">#4</a> Summary of what is currently known about the problem, including relevant previous studies                                                                                                                                        | 4 & 5       |
| Rationale           | <a href="#">#5</a> Informal or formal frameworks, models, concepts, and / or theories used to explain the problem, any reasons or                                                                                                                   | 5 & 6       |

|    |                              |                                                                                                                                                                                                              |        |
|----|------------------------------|--------------------------------------------------------------------------------------------------------------------------------------------------------------------------------------------------------------|--------|
|    |                              | assumptions that were used to develop the intervention(s), and reasons why the intervention(s) was expected to work                                                                                          |        |
| 1  |                              |                                                                                                                                                                                                              |        |
| 2  |                              |                                                                                                                                                                                                              |        |
| 3  |                              |                                                                                                                                                                                                              |        |
| 4  | Specific aims                | <a href="#">#6</a> Purpose of the project and of this report                                                                                                                                                 | 5 & 6  |
| 5  |                              |                                                                                                                                                                                                              |        |
| 6  | Context                      | <a href="#">#7</a> Contextual elements considered important at the outset of introducing the intervention(s)                                                                                                 | 6      |
| 7  |                              |                                                                                                                                                                                                              |        |
| 8  |                              |                                                                                                                                                                                                              |        |
| 9  |                              |                                                                                                                                                                                                              |        |
| 10 | Intervention(s)              | <a href="#">#08a</a> Description of the intervention(s) in sufficient detail that others could reproduce it                                                                                                  | N/A    |
| 11 |                              |                                                                                                                                                                                                              |        |
| 12 |                              |                                                                                                                                                                                                              |        |
| 13 |                              |                                                                                                                                                                                                              |        |
| 14 |                              | <a href="#">#08b</a> Specifics of the team involved in the work                                                                                                                                              | 10     |
| 15 |                              |                                                                                                                                                                                                              |        |
| 16 | Study of the Intervention(s) | <a href="#">#09a</a> Approach chosen for assessing the impact of the intervention(s)                                                                                                                         | 8-11   |
| 17 |                              |                                                                                                                                                                                                              |        |
| 18 |                              |                                                                                                                                                                                                              |        |
| 19 |                              |                                                                                                                                                                                                              |        |
| 20 |                              | <a href="#">#09b</a> Approach used to establish whether the observed outcomes were due to the intervention(s)                                                                                                | 8-11   |
| 21 |                              |                                                                                                                                                                                                              |        |
| 22 |                              |                                                                                                                                                                                                              |        |
| 23 |                              |                                                                                                                                                                                                              |        |
| 24 | Measures                     | <a href="#">#10a</a> Measures chosen for studying processes and outcomes of the intervention(s), including rationale for choosing them, their operational definitions, and their validity and reliability    | 7,8,10 |
| 25 |                              |                                                                                                                                                                                                              |        |
| 26 |                              |                                                                                                                                                                                                              |        |
| 27 |                              |                                                                                                                                                                                                              |        |
| 28 |                              |                                                                                                                                                                                                              |        |
| 29 |                              | <a href="#">#10b</a> Description of the approach to the ongoing assessment of contextual elements that contributed to the success, failure, efficiency, and cost                                             | 7-10   |
| 30 |                              |                                                                                                                                                                                                              |        |
| 31 |                              |                                                                                                                                                                                                              |        |
| 32 |                              |                                                                                                                                                                                                              |        |
| 33 |                              |                                                                                                                                                                                                              |        |
| 34 |                              | <a href="#">#10c</a> Methods employed for assessing completeness and accuracy of data                                                                                                                        | 7-11   |
| 35 |                              |                                                                                                                                                                                                              |        |
| 36 |                              |                                                                                                                                                                                                              |        |
| 37 |                              |                                                                                                                                                                                                              |        |
| 38 | Analysis                     | <a href="#">#11a</a> Qualitative and quantitative methods used to draw inferences from the data                                                                                                              | 8-11   |
| 39 |                              |                                                                                                                                                                                                              |        |
| 40 |                              |                                                                                                                                                                                                              |        |
| 41 |                              |                                                                                                                                                                                                              |        |
| 42 |                              | <a href="#">#11b</a> Methods for understanding variation within the data, including the effects of time as a variable                                                                                        | 8-11   |
| 43 |                              |                                                                                                                                                                                                              |        |
| 44 |                              |                                                                                                                                                                                                              |        |
| 45 |                              |                                                                                                                                                                                                              |        |
| 46 | Ethical considerations       | <a href="#">#12</a> Ethical aspects of implementing and studying the intervention(s) and how they were addressed, including, but not limited to, formal ethics review and potential conflict(s) of interest  | 11     |
| 47 |                              |                                                                                                                                                                                                              |        |
| 48 |                              |                                                                                                                                                                                                              |        |
| 49 |                              |                                                                                                                                                                                                              |        |
| 50 |                              |                                                                                                                                                                                                              |        |
| 51 |                              | <a href="#">#13a</a> Initial steps of the intervention(s) and their evolution over time (e.g., time-line diagram, flow chart, or table), including modifications made to the intervention during the project | N/A    |
| 52 |                              |                                                                                                                                                                                                              |        |
| 53 |                              |                                                                                                                                                                                                              |        |
| 54 |                              |                                                                                                                                                                                                              |        |
| 55 |                              |                                                                                                                                                                                                              |        |
| 56 |                              | <a href="#">#13b</a> Details of the process measures and outcome                                                                                                                                             | 8-11   |
| 57 |                              |                                                                                                                                                                                                              |        |
| 58 |                              |                                                                                                                                                                                                              |        |
| 59 |                              |                                                                                                                                                                                                              |        |
| 60 |                              |                                                                                                                                                                                                              |        |

|    |                |                      |                                                                   |         |
|----|----------------|----------------------|-------------------------------------------------------------------|---------|
| 1  |                | <a href="#">#13c</a> | Contextual elements that interacted with the intervention(s)      | 7-11    |
| 2  |                |                      |                                                                   |         |
| 3  |                | <a href="#">#13d</a> | Observed associations between outcomes, interventions, and        | 11-17   |
| 4  |                |                      | relevant contextual elements                                      |         |
| 5  |                |                      |                                                                   |         |
| 6  |                |                      |                                                                   |         |
| 7  |                | <a href="#">#13e</a> | Unintended consequences such as unexpected benefits,              | 18-20   |
| 8  |                |                      | problems, failures, or costs associated with the intervention(s). |         |
| 9  |                |                      |                                                                   |         |
| 10 |                |                      |                                                                   |         |
| 11 |                | <a href="#">#13f</a> | Details about missing data                                        | 8-11    |
| 12 |                |                      |                                                                   |         |
| 13 | Summary        | <a href="#">#14a</a> | Key findings, including relevance to the rationale and specific   | 21      |
| 14 |                |                      | aims                                                              |         |
| 15 |                |                      |                                                                   |         |
| 16 |                |                      |                                                                   |         |
| 17 |                | <a href="#">#14b</a> | Particular strengths of the project                               | 18-21   |
| 18 |                |                      |                                                                   |         |
| 19 | Interpretation | <a href="#">#15a</a> | Nature of the association between the intervention(s) and the     | 18-21   |
| 20 |                |                      | outcomes                                                          |         |
| 21 |                |                      |                                                                   |         |
| 22 |                |                      |                                                                   |         |
| 23 |                | <a href="#">#15b</a> | Comparison of results with findings from other publications       | 18-21   |
| 24 |                |                      |                                                                   |         |
| 25 |                | <a href="#">#15c</a> | Impact of the project on people and systems                       | 18-21   |
| 26 |                |                      |                                                                   |         |
| 27 |                | <a href="#">#15d</a> | Reasons for any differences between observed and anticipated      | 18-21   |
| 28 |                |                      | outcomes, including the influence of context                      |         |
| 29 |                |                      |                                                                   |         |
| 30 |                |                      |                                                                   |         |
| 31 |                | <a href="#">#15e</a> | Costs and strategic trade-offs, including opportunity costs       | 18-21   |
| 32 |                |                      |                                                                   |         |
| 33 |                |                      |                                                                   |         |
| 34 | Limitations    | <a href="#">#16a</a> | Limits to the generalizability of the work                        | 21-22   |
| 35 |                |                      |                                                                   |         |
| 36 |                | <a href="#">#16b</a> | Factors that might have limited internal validity such as         | 21-22   |
| 37 |                |                      | confounding, bias, or imprecision in the design, methods,         |         |
| 38 |                |                      | measurement, or analysis                                          |         |
| 39 |                |                      |                                                                   |         |
| 40 |                |                      |                                                                   |         |
| 41 |                | <a href="#">#16c</a> | Efforts made to minimize and adjust for limitations               | 21-22   |
| 42 |                |                      |                                                                   |         |
| 43 |                |                      |                                                                   |         |
| 44 | Conclusion     | <a href="#">#17a</a> | Usefulness of the work                                            | 22      |
| 45 |                |                      |                                                                   |         |
| 46 |                | <a href="#">#17b</a> | Sustainability                                                    | 22      |
| 47 |                |                      |                                                                   |         |
| 48 |                | <a href="#">#17c</a> | Potential for spread to other contexts                            | 21-22   |
| 49 |                |                      |                                                                   |         |
| 50 |                | <a href="#">#17d</a> | Implications for practice and for further study in the field      | 18-22   |
| 51 |                |                      |                                                                   |         |
| 52 |                | <a href="#">#17e</a> | Suggested next steps                                              | 18-22   |
| 53 |                |                      |                                                                   |         |
| 54 |                |                      |                                                                   |         |
| 55 | Funding        | <a href="#">#18</a>  | Sources of funding that supported this work. Role, if any, of the | 22 & 23 |
| 56 |                |                      | funding organization in the design, implementation,               |         |
| 57 |                |                      |                                                                   |         |
| 58 |                |                      |                                                                   |         |
| 59 |                |                      |                                                                   |         |
| 60 |                |                      |                                                                   |         |

interpretation, and reporting

The SQUIRE 2.0 checklist is distributed under the terms of the Creative Commons Attribution License CC BY-NC 4.0. This checklist can be completed online using <https://www.goodreports.org/>, a tool made by the [EQUATOR Network](#) in collaboration with [Penelope.ai](#)

For peer review only



# BMJ Open

## Barriers and facilitators to adopting high value practices and de-adopting low value practices in the Intensive Care Unit: A multi method study

|                                 |                                                                                                                                                                                                                                                                                                                                                                                                                                                                                                               |
|---------------------------------|---------------------------------------------------------------------------------------------------------------------------------------------------------------------------------------------------------------------------------------------------------------------------------------------------------------------------------------------------------------------------------------------------------------------------------------------------------------------------------------------------------------|
| Journal:                        | <i>BMJ Open</i>                                                                                                                                                                                                                                                                                                                                                                                                                                                                                               |
| Manuscript ID                   | bmjopen-2018-024159.R1                                                                                                                                                                                                                                                                                                                                                                                                                                                                                        |
| Article Type:                   | Research                                                                                                                                                                                                                                                                                                                                                                                                                                                                                                      |
| Date Submitted by the Author:   | 04-Dec-2018                                                                                                                                                                                                                                                                                                                                                                                                                                                                                                   |
| Complete List of Authors:       | Sauro, Khara; University of Calgary Cumming School of Medicine, Bagshaw, Sean; University of Alberta, Canada<br>Niven, Daniel; University of Calgary, Critical Care Medicine<br>Soo, Andrea; University of Calgary Cumming School of Medicine<br>Brundin-Mather, Rebecca; University of Calgary Cumming School of Medicine<br>Parsons Leigh, Jeanna; University of Calgary Cumming School of Medicine<br>Cook, Deborah; McMaster University,<br>Stelfox, Henry; University of Calgary, Critical Care Medicine |
| <b>Primary Subject Heading</b>: | Health services research                                                                                                                                                                                                                                                                                                                                                                                                                                                                                      |
| Secondary Subject Heading:      | Intensive care, Evidence based practice                                                                                                                                                                                                                                                                                                                                                                                                                                                                       |
| Keywords:                       | Quality Improvement, Healthcare System, Under-use and Over-use, Appropriateness, Intensive Care                                                                                                                                                                                                                                                                                                                                                                                                               |
|                                 |                                                                                                                                                                                                                                                                                                                                                                                                                                                                                                               |

SCHOLARONE™  
Manuscripts

**Title:** Barriers and facilitators to adopting high value practices and de-adopting low value practices in the Intensive Care Unit: A multi method study

**Authors & Affiliations:**

Khara M Sauro PhD,<sup>1,2</sup> Sean M Bagshaw MSc MD,<sup>4</sup> Daniel J Niven MD PhD,<sup>1,2</sup> Andrea Soo PhD,<sup>1</sup> Rebecca Brundin-Mather MSc,<sup>3</sup> Jeanna Parsons Leigh PhD,<sup>1</sup> Deborah J Cook MD,<sup>5</sup> Henry T Stelfox MD PhD<sup>1,2</sup>

<sup>1</sup> Department of Critical Care Medicine, University of Calgary, Calgary AB Canada

<sup>2</sup> Department of Community Health Sciences and O'Brien Institute for Public Health, University of Calgary, Calgary AB Canada

<sup>3</sup> Department of Medicine, University of Calgary, Calgary AB Canada

<sup>4</sup> Department of Critical Care Medicine, Faculty of Medicine & Dentistry, and the School of Public Health, University of Alberta, Edmonton AB Canada

<sup>5</sup>Departments of Medicine and Clinical Epidemiology & Biostatistics, McMaster University, Hamilton ON Canada

**Corresponding Author:**

Dr. H. Thomas Stelfox  
3134 Hospital Drive NW  
Calgary AB  
T2N 5A1  
Canada  
403-944-0072  
[tstelfox@ucalgary.ca](mailto:tstelfox@ucalgary.ca)

**Word Count:** Manuscript=3,368; Abstract=239

**References:** 47

**Figures and tables:** 3 figures, 2 table

## ABSTRACT

**Objective:** To compare and contrast illustrative examples of the adoption of high value practices and the de-adoption of low value practices.

**Design:** 1) Retrospective, population-based audit of low molecular weight heparin (LMWH) for venous thromboembolism (VTE) prophylaxis (high value practice) and albumin for fluid resuscitation (low value practice) and 2) Cross-sectional survey of healthcare providers.

**Setting:** Data were collected from nine adult medical-surgical ICUs in two large Canadian cities. Patients are managed in these ICUs by a group of multi-professional and multi-disciplinary healthcare providers.

**Participants:** Participants included 6946 ICU admissions and 309 healthcare providers from the same ICUs.

**Main Outcome Measures:** 1) The use of LMWH for VTE prophylaxis (percent ICU days) and albumin for fluid resuscitation (percent of patients); and 2) provider knowledge of evidence underpinning these practices, and barriers and facilitators to adopt and de-adopt these practices.

**Results:** LMWH was administered on 38.7% of ICU days, and 20.0% of patients received albumin.

1  
2  
3 Most participants had knowledge of evidence underpinning VTE prophylaxis and fluid  
4 resuscitation (59.1% and 84.2%, respectively). Providers perceived these practices to  
5 be followed. The most commonly reported barrier to adoption was insufficient  
6 knowledge/understanding (32.8%), and to de-adoption was clinical leader preferences  
7 (33.2%). On-site education was the most commonly identified facilitator for adoption  
8 and de-adoption (67.8% and 68.6%, respectively).  
9

10  
11  
12  
13  
14  
15  
16  
17  
18  
19 **Conclusions:** Despite knowledge of and self-reported adherence to best practices,  
20 the audit demonstrated opportunity to improve. Provider-reported barriers and  
21 facilitators to adoption and de-adoption are broadly similar.  
22  
23  
24  
25

26  
27  
28 **KEY WORDS:** Intensive Care; Appropriateness, Under-use and Over-use; Healthcare  
29 System; Quality Improvement  
30  
31  
32

### 33 **STRENGTHS & LIMITATIONS**

- 34  
35  
36 • A strength of this study is the use of mixed-methods to comprehensively  
37 compare adoption of high value practices and de-adoption of low value  
38 practices in the ICU.  
39  
40
- 41  
42 • Another strength is the use of population-based data to capture current clinical  
43 practices.  
44  
45
- 46  
47 • The survey used to assess barriers and facilitators of the two illustrative  
48 practices was derived from a validated survey instrument. It was simple and  
49 designed to garner a representative perspective from all provider professions  
50 and therefore captured key concepts, but not granular data.  
51  
52  
53  
54  
55  
56  
57  
58  
59  
60

- 1
  - 2
  - 3
  - 4
  - 5
  - 6
  - 7
  - 8
  - 9
  - 10
  - 11
  - 12
  - 13
  - 14
  - 15
  - 16
  - 17
  - 18
  - 19
  - 20
  - 21
  - 22
  - 23
  - 24
  - 25
  - 26
  - 27
  - 28
  - 29
  - 30
  - 31
  - 32
  - 33
  - 34
  - 35
  - 36
  - 37
  - 38
  - 39
  - 40
  - 41
  - 42
  - 43
  - 44
  - 45
  - 46
  - 47
  - 48
  - 49
  - 50
  - 51
  - 52
  - 53
  - 54
  - 55
  - 56
  - 57
  - 58
  - 59
  - 60
- Our study provides several insights into similarities and differences between adoption of high value practices and de-adoption of low value practices.

For peer review only

## INTRODUCTION

Optimizing the quality of care<sup>1</sup> is of particular importance in the intensive care unit (ICU) due to the acuity of patient illness and substantial resources required to care for these patients. However, practice change (adopting high value practices or de-adopting low value practices) is slow with some evidence suggesting it can take well over a decade.<sup>2</sup> To minimize the latency for change, it is important to find ways to improve the implementation of evidence-based practices.

A growing body of evidence has evaluated barriers and facilitators for adopting high value practices (effective at improving outcomes).<sup>3-6</sup> Substantially less is known about the barriers and facilitators for de-adopting low value practices (ineffective at improving outcomes or harmful), and how they compare to those for adopting high value practices.<sup>7,8</sup> De-adoption, also known by several other terms such as disinvestment and de-implementation,<sup>7</sup> is the discontinuation of a practice that has been previously adopted.<sup>9</sup> Some have suggested that the adoption of high value practices and de-adoption of low value practices involves similar processes and common facilitators and barriers;<sup>10,11</sup> however, others suggest that the two are clearly distinct.<sup>8,12</sup> There has been limited comparative evaluation of adoption and de-adoption and this is an important knowledge gap given the growing number of initiatives aimed at de-adopting low value practices.<sup>13-16</sup>

1  
2  
3 The objective of this study was to describe illustrative example practices of the  
4 adoption of a high value practice (use of low molecular weight heparin [LMWH]  
5 instead of unfractionated heparin [UFH] for venous thromboembolism prophylaxis  
6 [VTE] and the de-adoption of a low value practice (albumin for fluid resuscitation) in  
7 the ICU. The results of this study prompted a subsequent implementation study to  
8 improve these two practices. The audit data identified important opportunities to  
9 improve clinical care, and the perceived barriers and facilitators identified in the  
10 survey were used to inform the development of interventions.  
11  
12  
13  
14  
15  
16  
17  
18  
19  
20  
21  
22  
23

## 24 **METHODS**

### 25 **Study design**

26 This multi-method observational study included: 1) a retrospective cohort study of  
27 patients admitted to ICUs to describe current VTE prophylaxis and fluid resuscitation  
28 practices, and 2) a cross-sectional survey of ICU healthcare providers to examine:  
29 knowledge of evidence underpinning these two practices, and perceived barriers and  
30 facilitators to adopt LMWH for VTE prophylaxis and de-adopt albumin for fluid  
31 resuscitation.  
32  
33  
34  
35  
36  
37  
38  
39  
40  
41  
42  
43

### 44 **Setting**

45 All data were collected from nine adult medical-surgical ICUs in the two largest cities  
46 in a Canadian province (population of 4.1 million). A single health services provider is  
47 responsible for the provision of all hospital-based care in the province and uses a  
48 single formulary across all ICUs (clinical practices may differ between cities and sites).  
49  
50  
51  
52  
53  
54  
55  
56  
57  
58  
59  
60

1  
2  
3 ICU patients are managed by a multi-disciplinary and multi-professional group of  
4  
5 healthcare providers, including (but not limited to): physicians, medical trainees  
6  
7 (clinical fellows and residents), nurse practitioners (NPs with prescribing privileges),  
8  
9 pharmacists, and nurses (managers, educators, bedside).  
10  
11  
12  
13

## 14 **Audit of current practices**

### 15 **Participants**

16  
17  
18  
19 We included patients admitted to nine adult medical-surgical ICUs between January 1,  
20  
21 2014 and December 31, 2014. For analyses, patients were grouped into two cohorts.  
22

23  
24 1) The adoption cohort consisted of patients without a contraindication for  
25  
26 pharmacological VTE prophylaxis where according to international and local  
27  
28 guidelines LMWH should be prescribed.<sup>17-21</sup> Contraindications to pharmacological  
29  
30 prophylaxis included a diagnosis potentially associated with a high risk of bleeding  
31  
32 (Supplemental Content 1), daily assessed platelet count  $<50 \times 10^9/L$ ,  $INR \geq 2$ ,  $PTT \geq 55$   
33  
34 seconds, or receipt of therapeutic anti-coagulation.  
35  
36

37  
38 2) The de-adoption cohort consisted of patients without an indication for use of  
39  
40 albumin for fluid resuscitation and where according to the current evidence-base  
41  
42 albumin should not be used for fluid resuscitation.<sup>22-25</sup> Potential indications for albumin  
43  
44 included documented liver disease (cirrhosis or hepatic failure), or receipt of plasma  
45  
46 exchange.<sup>26-29</sup> The two study cohorts were drawn from the same patient population  
47  
48 and patients satisfying both sets of clinical indications were included in both cohorts.  
49  
50

### 51 **Data source**



1  
2  
3 All nine ICUs employ a shared integrated, prospective, clinical information system that  
4 captures and delivers multimodal patient data (demographic, clinical, outcome) in real  
5 time to the bedside (eCritical MetaVision, iMDsoft, MetaVision), and is also a  
6 repository and clinical analytics system that stores these data (eCritical TRACER) to  
7 support quality improvement and clinical research. eCritical TRACER was used to  
8 extract all data.  
9

### 19 Variables

20 Patient and ICU demographic variables included age, sex, comorbidities, admission  
21 type, disease severity (APACHE II score), ICU and hospital length of stay, ICU and  
22 hospital mortality. Data abstracted included: 1) type of VTE prophylaxis (mechanical  
23 included antiembolic stockings and sequential compression devices, and  
24 pharmacological included unfractionated heparin [UFH] and LMWH), 2) ICU day that  
25 VTE prophylaxis was administered, 3) if the patient received albumin, 4) quantity  
26 (units) of albumin, and 5) ICU day that albumin was administered. An ICU day was  
27 defined as any portion of a day between 07:00 and 06:59, recognizing that follow-up  
28 time on admission day and discharge day may be less than 24 hours.  
29  
30  
31  
32  
33  
34  
35  
36  
37  
38  
39  
40  
41  
42  
43

### 44 Data analysis

45 Descriptive statistics (means with standard deviations [SD], medians with interquartile  
46 ranges [IQR], frequencies with proportions) were used to describe the two cohorts.  
47  
48 The proportion of admissions and ICU days with LMWH, UFH, and mechanical VTE  
49 prophylaxis by ICU and ICU day; and with any albumin administration by ICU and  
50  
51  
52  
53  
54  
55  
56  
57  
58  
59  
60

1  
2  
3 patient were calculated to describe current clinical practices. The unit of analysis for  
4  
5 our outcome for the adoption cohort (LMWH use) was patient days because VTE  
6  
7 prophylaxis is a routine clinical practice that should be performed on a daily basis.  
8  
9  
10 Conversely, the unit of analysis for our outcome for the de-adoption cohort (albumin  
11  
12 use) was per patient because fluid resuscitation is a sporadic event that is not part of  
13  
14 routine daily patient care.  
15

16  
17  
18  
19 To examine potential associations between patient demographic and sites, and the  
20  
21 use of the high value practice (LMWH) a multivariable generalized estimating  
22  
23 equations (GEEs) logistic regression model with exchangeable correlation structure  
24  
25 given daily measurements (clustering by patient) was used. To examine potential  
26  
27 associations between demographic and site-level factors, and the use of the low value  
28  
29 practice (albumin) a multivariable logistic regression model given a single  
30  
31 measurement per patient was used.  
32  
33  
34  
35  
36  
37

### 38 **Barriers and facilitators to adopting LMWH for VTE prophylaxis and de-adopting** 39 **albumin for fluid resuscitation** 40

#### 41 Survey development 42

43  
44 The survey was modeled after previous work on adoption of LMWH for VTE  
45  
46 prophylaxis,<sup>30</sup> and refined to include questions regarding fluid resuscitation. Because  
47  
48 research around barriers and facilitators of de-adopting low value practices is in its  
49  
50 infancy<sup>31</sup> the evidence of barriers and facilitators for adopting high value practices was  
51  
52 employed.  
53  
54  
55  
56  
57  
58  
59  
60

1  
2  
3  
4  
5 The survey was divided into four sections: participant demographic information,  
6  
7 knowledge of the current evidence underpinning the best practices, and perceptions  
8  
9 of barriers and facilitators to the use of the two illustrative examples of best practices  
10  
11 (Supplemental Content 2).  
12  
13  
14

15  
16  
17 The survey was pilot tested in two phases: Phase 1) Seven providers completed the  
18  
19 survey and identified unnecessary, missing, or poorly worded items. The survey was  
20  
21 modified and pilot tested with 12 additional ICU providers (1 attending physician, 2  
22  
23 residents, 1 clinical fellow, 1 nurse practitioner, 1 nurse manager/charge nurse, 1  
24  
25 nurse educator, 2 bedside nurses, and 3 pharmacists). Phase 2) Providers completed  
26  
27 the survey twice (7-10 days apart) and an additional brief questionnaire to rate the  
28  
29 clinical sensibility of the survey. Test-retest reliability of the survey demonstrated a  
30  
31 mean intraclass correlation coefficient (ICC) of 0.66 (SD 0.47) for continuous  
32  
33 responses and a mean proportion of agreement of 0.86 (SD 0.10) for categorical  
34  
35 responses. The low ICC for continuous responses is due to low variability in  
36  
37 responses for questions relating to knowledge of best practices. The participants  
38  
39 agreed that the survey had face validity (100%), content validity (92%), clarity (92%),  
40  
41 utility (100%), discriminability (75%), and minimal redundancy (100%).  
42  
43  
44  
45  
46  
47  
48

## 49 Participants

50  
51 Healthcare providers (as described in Setting) that cared for patients in the nine ICUs  
52  
53 were invited by email to participate in the study. Invitations to participate were sent to  
54  
55  
56  
57  
58  
59

1  
2  
3 healthcare providers by the principal investigators or by a local clinical leader and  
4 included a link to the electronic survey (Fluid Survey) or were provided a paper copy if  
5 requested. Weekly reminders were sent for three weeks. Providers that responded to  
6 the survey were offered entry into a draw for one of three \$20 coffee gift cards.  
7  
8  
9  
10  
11  
12  
13

## 14 Data Analysis

15 We used descriptive statistics to describe demographic features of participants,  
16 knowledge of best practices, perceived barriers to adopting high value practices and  
17 de-adopting low value practices, perceived facilitators to encourage adopting high  
18 value practices and de-adopting low value practices. Barriers and facilitators to the  
19 use of best practices were described overall, and by professional group. Professions  
20 were categorized into three groups for analysis: 1) Physicians/NPs (those who  
21 prescribe), 2) Nurses (those who administer), and 3) Pharmacists (those who advise  
22 prescribers). Chi-squared tests were used to test for statistical significance between  
23 groups.  
24  
25  
26  
27  
28  
29  
30  
31  
32  
33  
34  
35  
36  
37  
38  
39

## 40 Patient and public involvement

41 Patient and family representatives were members of a committee that identified and  
42 prioritized research questions for improving the care of critically ill patients.<sup>32</sup> LMWH  
43 for VTE prophylaxis and de-adopting albumin for fluid resuscitation were two of the  
44 research questions identified by this committee. Patients were not involved in the  
45 design, the recruitment and conduct of this study. The results of this study have been  
46 disseminated to patient and family advisors through oral presentations.  
47  
48  
49  
50  
51  
52  
53  
54  
55  
56  
57  
58  
59  
60

## Ethical considerations

This study was approved by the University of Calgary Conjoint Health Research Ethics Board (REB14-0992 and REB15-2147) and the University of Alberta Research Ethics Board (Pro00056709 and Pro00060650).

## RESULTS

### Audit of current practices

There were 6,946 ICU admissions during the study period, from 6,299 unique patients. Patient characteristics are presented in Supplemental Content 3.

The adoption cohort consisted of 4,931 admissions (71.0% of all admissions) without a contraindication to pharmacological VTE prophylaxis, and the de-adoption cohort consisted of 6,467 admissions (93.1%) without a potential indication for albumin (Supplemental Content 4).

During the ICU stay LMWH was given on 38.7% of ICU days, UFH on 45.3% of ICU days and mechanical prophylaxis (exclusive of pharmacological prophylaxis) on 7.7% of ICU days. The type of VTE prophylaxis administered varied throughout patients' ICU stay; administration of mechanical devices and UFH decreased over the course of the ICU stay while administration of LMWH increased (Supplemental Content 5).

6,804 units of albumin were administered to 20.0% of the 6,467 admissions without documented liver disease or receipt of plasma exchange. Among those receiving at least 1 unit of albumin, the median number of units per patient was 3 (IQR=1.0-6.0). Albumin was administered on 6.5% of ICU days.

When controlling for demographic and site-level factors, the odds of receiving LMWH for VTE prophylaxis and not receiving albumin for fluid resuscitation were significantly lower for those patients with higher severity of illness (APACHE II score). The odds of receiving LMWH for VTE prophylaxis were significantly higher for patients with non-surgical admissions compared to those with elective surgical admissions (odds ratio = 1.34 (95% confidence interval 1.08-1.66); Table 1). There were significant differences in the odds of using LMWH for VTE prophylaxis, and not using albumin for fluid resuscitation across ICUs (Supplemental Content 6), and when controlling for patient-level factors some of these differences persisted especially with regards to the use of LMWH for VTE prophylaxis (Table 1).

**Table 1.** Association between patient demographic and sites, and the use of LMWH for VTE prophylaxis and not using albumin for fluid resuscitation

|                                 | <b>Appropriate VTE prophylaxis OR (95% CI)*</b> | <b>Appropriate fluid resuscitation OR (95% CI)**</b> |
|---------------------------------|-------------------------------------------------|------------------------------------------------------|
| Age                             | NS <sup>†</sup>                                 | 0.999 (0.999-1.00)                                   |
| Female                          | NS <sup>†</sup>                                 | NS <sup>†</sup>                                      |
| Any comorbidity                 | NS <sup>†</sup>                                 | NS <sup>†</sup>                                      |
| Admission type                  |                                                 |                                                      |
| Elective surgery                | 1.00 (reference group)                          | 1.00 (reference group)                               |
| Emergent surgery                | 1.19 (0.92-1.53)                                | 0.92 (0.88-0.95)                                     |
| No surgery                      | 1.34 (1.08-1.66)                                | 1.02 (0.98-1.05)                                     |
| APACHE II Score (ICU admission) | 0.958 (0.951-0.965)                             | 0.989 (0.988-0.990)                                  |
| Site                            |                                                 |                                                      |
| C1                              | 1.00 (reference group)                          | 1.00 (reference group)                               |

|    |                  |                  |
|----|------------------|------------------|
| C2 | 1.32 (1.07-1.64) | 0.96 (0.92-1.00) |
| C3 | 1.13 (0.89-1.46) | 0.98 (0.94-1.03) |
| C4 | 1.48 (1.15-1.90) | 0.98 (0.93-1.02) |
| E1 | 2.12 (1.66-2.73) | 0.90 (0.86-0.95) |
| E2 | 0.86 (0.71-1.05) | 0.90 (0.87-0.92) |
| E3 | 7.26 (5.46-9.65) | 0.92 (0.87-0.97) |
| E4 | 0.76 (0.63-0.92) | 0.88 (0.85-0.91) |
| E5 | 1.61 (1.23-2.10) | 0.75 (0.72-0.79) |

*Footnote:* all “C” sites indicate ICU in Calgary and all “E” sites indicate ICU in Edmonton

\*multivariable generalized estimating equations (GEEs) logistic regression model with exchangeable correlation structure given daily measurements (clustering by patient); “appropriate” considered *use of LMWH*

\*\*standard multivariable logistic regression model given single measurement per patient; “appropriate” considered *not using albumin*

†NS = non-significant, removed from model

## **Barriers and facilitators to adopting LMWH for VTE prophylaxis and de-adopting albumin for fluid resuscitation**

### Participants

83.8% (259 of 309) of participants responded; physicians/NPs (48.3%), nurses (42.5%), and pharmacists (9.3%). Participants worked in healthcare for a median of 13 years (IQR=7.1-20.0) and in critical care for a median of 8 years (IQR=3.0-15.0; Supplemental Content 7).

### Knowledge of evidence

Most participants reported that LMWH was most effective at preventing deep vein thrombosis and pulmonary embolism; and that crystalloids were most effective for fluid resuscitation (Table 2). Perceptions regarding the effectiveness of VTE prophylaxis varied by professional group, as did perceptions regarding the risks of harm (Table 2).

Perceptions regarding effectiveness of albumin for fluid resuscitation and risks of

1  
2  
3 harm associated with each form of fluid resuscitation did not vary by professional  
4  
5 group but perceptions regarding the risk of fluid overload did (Table 2).  
6

7  
8 It was perceived that both best practices were being followed in the ICUs where the  
9  
10 participants practiced (Table 2).  
11  
12  
13  
14  
15  
16  
17  
18  
19  
20  
21  
22  
23  
24  
25  
26  
27  
28  
29  
30  
31  
32  
33  
34  
35  
36  
37  
38  
39  
40  
41  
42  
43  
44  
45  
46  
47  
48  
49  
50  
51  
52  
53  
54  
55  
56  
57  
58  
59  
60



**Table 2.** Knowledge of best practices for VTE prophylaxis and fluid resuscitation

| Survey question                                                                                             | % (N)            |                                     |                             |                                |
|-------------------------------------------------------------------------------------------------------------|------------------|-------------------------------------|-----------------------------|--------------------------------|
|                                                                                                             | Overall<br>N=259 | Physicians/NPs<br>48.3%<br>(N= 125) | Nurses<br>42.5%<br>(N= 110) | Pharmacists<br>9.3%<br>(N= 24) |
| What form(s) of prophylaxis is/are most effective at preventing deep vein thrombosis?*                      |                  |                                     |                             |                                |
| LMWH only                                                                                                   | 59.1 (153)       | 63.2 (79)                           | 51.8 (57)                   | 70.8 (17)                      |
| UFH only                                                                                                    | 4.3 (11)         | 2.4 (3)                             | 7.3 (8)                     | 0.0 (0)                        |
| LMWH & UFH                                                                                                  | 16.2 (42)        | 24.0 (30)                           | 5.5 (6)                     | 25.0 (6)                       |
| Mechanical only                                                                                             | 1.9 (5)          | 0.0 (0)                             | 4.6 (5)                     | 0.0 (0)                        |
| (LMWH or UFH) and Mechanical                                                                                | 15.1 (39)        | 8.0 (10)                            | 25.5 (28)                   | 4.2 (1)                        |
| Unsure only                                                                                                 | 3.5 (9)          | 2.4 (3)                             | 5.5 (6)                     | 0.0 (0)                        |
| What form(s) of prophylaxis is/are most effective at preventing pulmonary embolism? *                       |                  |                                     |                             |                                |
| LMWH only                                                                                                   | 56.8 (147)       | 72.0 (90)                           | 33.6 (37)                   | 83.3 (20)                      |
| UFH only                                                                                                    | 18.2 (47)        | 1.6 (2)                             | 40.9 (45)                   | 0.0 (0)                        |
| LMWH & UFH                                                                                                  | 12.7 (33)        | 20.8 (26)                           | 3.6 (4)                     | 12.5 (3)                       |
| Mechanical only                                                                                             | 0.4 (1)          | 0.0 (0)                             | 0.9 (1)                     | 0.0 (0)                        |
| (LMWH or UFH) & Mechanical                                                                                  | 8.5 (22)         | 3.2 (4)                             | 15.5 (17)                   | 4.2 (1)                        |
| Unsure only                                                                                                 | 3.5 (9)          | 2.4 (3)                             | 5.5 (6)                     | 0.0 (0)                        |
| Which form(s) of prophylaxis is/are most cost effective?*                                                   |                  |                                     |                             |                                |
| LMWH only                                                                                                   | 51.0 (132)       | 70.4 (88)                           | 22.7 (25)                   | 79.2 (19)                      |
| UFH only                                                                                                    | 15.4 (40)        | 12.8 (16)                           | 20.0 (22)                   | 8.3 (2)                        |
| LMWH & UFH                                                                                                  | 4.3 (11)         | 5.6 (7)                             | 0.9 (1)                     | 12.5 (3)                       |
| Mechanical only                                                                                             | 10.0 (26)        | 4.8 (6)                             | 18.2 (20)                   | 0.0 (0)                        |
| (LMWH or UFH) & Mechanical                                                                                  | 2.7 (7)          | 0.0 (0)                             | 6.4 (7)                     | 0.0 (0)                        |
| Unsure only                                                                                                 | 16.6 (43)        | 6.4 (8)                             | 31.8 (35)                   | 0.0 (0)                        |
| Which form(s) of pharmacological prophylaxis has/have the lowest risk of bleeding?†                         |                  |                                     |                             |                                |
| LMWH only                                                                                                   | 57.5 (149)       | 47.2 (59)                           | 69.1 (76)                   | 58.3 (14)                      |
| UFH only                                                                                                    | 24.7 (64)        | 32.8 (41)                           | 18.2 (20)                   | 12.5 (3)                       |
| LMWH & UFH                                                                                                  | 5.0 (13)         | 6.4 (8)                             | 0.0 (0)                     | 20.8 (5)                       |
| Unsure only                                                                                                 | 12.7 (33)        | 13.6 (17)                           | 12.7 (14)                   | 8.3 (2)                        |
| Which form(s) of pharmacological prophylaxis has/have the lowest risk of heparin induced thrombocytopenia?* |                  |                                     |                             |                                |

|                                                                                                                                  |                          |                                              |                                      |                                         |           |
|----------------------------------------------------------------------------------------------------------------------------------|--------------------------|----------------------------------------------|--------------------------------------|-----------------------------------------|-----------|
|                                                                                                                                  | LMWH only                | 86.1 (223)                                   | 94.4 (118)                           | 74.6 (82)                               | 95.8 (23) |
|                                                                                                                                  | UFH only                 | 6.6 (17)                                     | 3.2 (4)                              | 11.8 (13)                               | 0.0 (0)   |
|                                                                                                                                  | LMWH & UFH               | 0.4 (1)                                      | 0.0 (0)                              | 0.0 (0)                                 | 4.2 (1)   |
|                                                                                                                                  | Unsure only              | 7.0 (18)                                     | 2.4 (3)                              | 13.6 (15)                               | 0.0 (0)   |
| To what extent do you think best practices are followed for preventing DVT/PE in your ICU?<br>0=never and 7=always, Median (IQR) |                          |                                              |                                      |                                         |           |
|                                                                                                                                  |                          | 6 (5-6)                                      | 6 (5-6)                              | 6 (6-7)                                 | 6 (5-6)   |
|                                                                                                                                  |                          |                                              |                                      |                                         |           |
| <b>Survey question</b>                                                                                                           | <b>Overall<br/>N=259</b> | <b>Physicians/NPs<br/>48.3%<br/>(N= 125)</b> | <b>Nurses<br/>42.5%<br/>(N= 110)</b> | <b>Pharmacists<br/>9.3%<br/>(N= 24)</b> |           |
| What form(s) of IV fluids is/are most effective for fluid resuscitation? ‡                                                       |                          |                                              |                                      |                                         |           |
|                                                                                                                                  | Albumin only             | 3.5 (9)                                      | 2.4 (3)                              | 5.5 (6)                                 | 0.0 (0)   |
|                                                                                                                                  | Crystalloids only        | 84.2 (218)                                   | 83.2 (104)                           | 82.7 (91)                               | 95.8 (23) |
|                                                                                                                                  | Albumin & Crystalloids   | 8.5 (22)                                     | 9.6 (12)                             | 9.1 (10)                                | 0.0 (0)   |
|                                                                                                                                  | Unsure only              | 3.9 (10)                                     | 4.8 (6)                              | 2.7 (3)                                 | 4.2 (1)   |
| Which form(s) of IV resuscitation fluids are most cost effective? ‡                                                              |                          |                                              |                                      |                                         |           |
|                                                                                                                                  | Albumin only             | 0.4 (1)                                      | 0.0 (0)                              | 0.9 (1)                                 | 0.0 (0)   |
|                                                                                                                                  | Crystalloids only        | 94.6 (245)                                   | 94.4 (118)                           | 95.5 (105)                              | 91.7 (22) |
|                                                                                                                                  | Albumin & Crystalloids   | 0.4 (1)                                      | 0.8 (1)                              | 0.0 (0)                                 | 0.0 (0)   |
|                                                                                                                                  | Unsure only              | 4.6 (12)                                     | 4.8 (6)                              | 3.6 (4)                                 | 8.3 (2)   |
| Which form(s) of IV resuscitation fluids has the lowest risk of fluid overload? *                                                |                          |                                              |                                      |                                         |           |
|                                                                                                                                  | Albumin only             | 47.1 (122)                                   | 32.8 (41)                            | 69.1 (76)                               | 20.8 (5)  |
|                                                                                                                                  | Crystalloids only        | 29.7 (77)                                    | 36.8 (46)                            | 23.6 (26)                               | 20.8 (5)  |
|                                                                                                                                  | Albumin & Crystalloids   | 1.9 (5)                                      | 3.2 (4)                              | 0.0 (0)                                 | 4.2 (1)   |
|                                                                                                                                  | Unsure only              | 21.2 (55)                                    | 27.2 (34)                            | 7.3 (8)                                 | 54.2 (13) |
| Which form(s) of IV resuscitation fluids has the lowest risk of infectious disease? ‡                                            |                          |                                              |                                      |                                         |           |
|                                                                                                                                  | Albumin only             | 2.7 (7)                                      | 1.6 (2)                              | 4.6 (5)                                 | 0.0 (0)   |
|                                                                                                                                  | Crystalloids only        | 86.5 (224)                                   | 87.2 (109)                           | 87.3 (96)                               | 79.2 (19) |
|                                                                                                                                  | Albumin & Crystalloids   | 0.8 (2)                                      | 0.8 (1)                              | 0.9 (1)                                 | 0.0 (0)   |
|                                                                                                                                  | Unsure only              | 10.0 (26)                                    | 10.4 (13)                            | 7.3 (8)                                 | 20.8 (5)  |

To what extent do you think best practices are followed for prescribing fluid boluses in your ICU?

0=never and 7=always; Median (IQR)

|  |         |         |         |         |
|--|---------|---------|---------|---------|
|  | 6 (5-6) | 5 (5-6) | 6 (5-6) | 5 (5-6) |
|--|---------|---------|---------|---------|

<sup>1</sup>The order of the survey items are as presented in this table.

<sup>2</sup>Evidence suggests the efficacy of LMWH for deep vein thrombosis is similar to or better than UFH.<sup>18,19,33,34</sup> Evidence suggests that LMWH is more efficacious than UFH for preventing pulmonary embolism, has a lower incidence of heparin induced thrombocytopenia, and a similar or lower risk of bleeding.<sup>18,19,33,34</sup>

<sup>3</sup>Evidence suggests that LMWH is more cost effective than UFH.<sup>18</sup>

<sup>4</sup>Evidence suggests that albumin and crystalloids are similarly effective for fluid resuscitation.<sup>21, 24, 25, 26</sup> Evidence suggests that albumin has a higher risk of infectious disease transmission than crystalloids and is less cost-effective than crystalloids.

**Abbreviations:** **IQR** = interquartile range (p25 - p75), **LMWH** = low molecular weight heparin, **N** = number, **NP** = nurse practitioner, **UFH** = unfractionated heparin, \* = responses varied by professional group (p<0.001), † = responses varied by professional group (p=0.01), ‡ = responses did not vary by professional group (p>0.05)

1  
2  
3  
4  
5 Barriers to adopting LMWH for VTE prophylaxis and de-adopting albumin for fluid  
6 resuscitation  
7

8  
9  
10 Barriers to adoption and de-adoption were reported by 65.2% and 64.9% of  
11 respondents, respectively. The most commonly reported perceived barriers to  
12 adopting LMWH for VTE prophylaxis were insufficient knowledge or understanding,  
13 ICU culture, and no clinical guidelines (Figure 1). The most commonly reported  
14 barriers to de-adopting albumin for fluid resuscitation were a strong clinical preference  
15 of the local clinical leaders in the ICUs, ICU culture, and insufficient knowledge or  
16 understanding (Figure 1). Reported barriers differed between professional groups for  
17 both adoption (Figure 2a) and de-adoption (Figure 2b).  
18  
19  
20  
21  
22  
23  
24  
25  
26  
27  
28  
29

30  
31 Facilitators to adopting LMWH for VTE prophylaxis and de-adopting albumin for fluid  
32 resuscitation  
33

34  
35 On site education and pre-set orders were perceived to be the most commonly  
36 reported facilitator of both adoption and de-adoption (Figure 3). Verbal reminders  
37 from pharmacists to physicians was commonly reported as a perceived facilitator for  
38 adopting LMMH for VTE prophylaxis. A local leader championing the practice was  
39 commonly reported as a perceived facilitator for de-adopting albumin for fluid  
40 resuscitation (Figure 3). There was no variability by professional group.  
41  
42  
43  
44  
45  
46  
47  
48  
49  
50

## 51 **DISCUSSION**

52  
53  
54  
55  
56  
57  
58  
59  
60

1  
2  
3 The present study identified opportunities to improve the use of best practices for VTE  
4 prophylaxis (adopting the high value practice of LMWH) and fluid resuscitation (de-  
5 adopting the low value practice of albumin). Our audit data demonstrated that current  
6 practice does not reflect providers' understanding of the evidence for these practices.  
7  
8 The use of the best practice for these two illustrative examples were less likely for  
9 patients with greater severity of illness and varied across institutions. The perceived  
10 barriers and facilitators to adoption and de-adoption were broadly similar.  
11  
12  
13  
14  
15  
16  
17  
18  
19  
20

21 Are de-adoption and adoption just the flip-side of the same coin? There is substantial  
22 literature describing the adoption of high value practices, but much less is known  
23 about de-adoption of low value practices.<sup>7</sup> Science can inform clinical practice through  
24 discovery resulting in adoption of a new practice, replacement resulting in a practice  
25 update, and reversal resulting in de-adoption of an existing practice. It is only recently  
26 that the last concept, de-adopting low value practices, has been debated in journals  
27 and by professional societies.<sup>13,14,16</sup> The practical implication is that there is limited  
28 evidence to inform whether the barriers and facilitators for adoption and de-adoption  
29 are similar or sufficiently distinct to warrant different approaches.<sup>8,10-12</sup> Our study adds  
30 to the limited evidence base by suggesting that culture or organizational factors,  
31 provider characteristics, and patient characteristics are perceived to be important  
32 barriers and facilitators that may play broadly similar roles in adoption and de-  
33 adoption.<sup>10,11</sup>  
34  
35  
36  
37  
38  
39  
40  
41  
42  
43  
44  
45  
46  
47  
48  
49  
50  
51  
52  
53  
54  
55  
56  
57  
58  
59  
60

1  
2  
3 Knowledge translation (KT) interventions are strategies to improve the synthesis,  
4 dissemination, exchange, and application of evidence to improve health.<sup>4</sup> KT  
5 interventions tailored to the specific barriers and facilitators of an innovation and the  
6 local context are more likely to effect change.<sup>4,5</sup> Our study provides insight into the  
7 perceived barriers and facilitators of adopting high value practices (LMWH for VTE  
8 prophylaxis) and de-adopting low value practices (albumin for fluid resuscitation)  
9 within ICUs, which should be taken into consideration when designing KT  
10 interventions. Interestingly, despite knowledge of the evidence underlying the  
11 illustrative example practices, providers perceived insufficient knowledge or  
12 understanding to be a barrier and perceived education to be a facilitator to both  
13 adopting high value practices and de-adopting low value practices. These barriers and  
14 facilitators are consistent with a systematic review that suggests the most effective KT  
15 interventions in the ICU employ a combination of education and protocols.<sup>35</sup> While  
16 consistent with previous KT studies, this finding is paradoxical. It is possible that while  
17 knowledgeable, providers' confidence in applying their knowledge clinically was low  
18 and they believed education to be the intervention needed to improve their confidence  
19 in applying their knowledge. Furthermore, confidence in applying new evidence in  
20 clinical practice may be particularly challenging in the care of severely ill patients.  
21 This hypothesis is supported by two of our findings: 1) the use of LMWH for VTE  
22 prophylaxis and not using albumin for fluid resuscitation was inversely associated with  
23 severity of patient illness and 2) the use of LMWH and not using albumin increased as  
24 the patient became more stable (over ICU stay). Potential hypotheses to explain these  
25 observations include that clinicians may employ conservative decision-making (use  
26  
27  
28  
29  
30  
31  
32  
33  
34  
35  
36  
37  
38  
39  
40  
41  
42  
43  
44  
45  
46  
47  
48  
49  
50  
51  
52  
53  
54  
55  
56  
57  
58  
59  
60

1  
2  
3 more familiar practices) or unintendedly neglect to use best practices when caring for  
4  
5 sicker patients, but this need further exploration. The implications are that KT  
6  
7 interventions should consider clinician heuristics that are likely to be influenced by the  
8  
9 nature and severity of patient illness.  
10  
11  
12  
13

14  
15 Our study suggests that factors other than knowledge may contribute to the  
16  
17 successful adoption of high value practices and de-adoption of low value practices,  
18  
19 which includes culture, providers, and the innovation. These factors have previously  
20  
21 been identified within the context of the ICU.<sup>36-42</sup> ICU culture and local clinical leader  
22  
23 preferences were among the most commonly endorsed barriers to adopting high  
24  
25 value practices and de-adopting low value practices in this study and in our study.  
26  
27 This is highlighted by the variation in the use of LMWH between ICUs, even when  
28  
29 patient level factors were taken into consideration. Interestingly, this finding was less  
30  
31 pronounced for de-adoption, which has been previously reported.<sup>8</sup> Culture, also  
32  
33 referred to as organizational context, is a frequently cited barrier to evidence-based  
34  
35 medicine and can have a profound effect on clinical practice.<sup>6,43</sup> However, few studies  
36  
37 have systematically evaluated the effect of culture on adopting high value practices  
38  
39 and de-adopting low value practices, and implementation studies infrequently account  
40  
41 for the effect of culture on their practice change interventions.<sup>44</sup> Similarly, the  
42  
43 professional role of the provider is not often contextualized but may be important (e.g.,  
44  
45 should pharmacists and nurses be targeted in KT interventions designed to change  
46  
47 the prescribing patterns of physicians and if so how?).<sup>45</sup> This may be especially  
48  
49  
50  
51  
52  
53  
54  
55  
56  
57  
58  
59  
60

1  
2  
3 relevant as healthcare delivery becomes increasingly multi-professional and team-  
4 based as illustrated in our setting (ICU).  
5  
6  
7  
8  
9

10 The characteristics of innovations themselves may influence change in clinical  
11 practice. Evidence suggests that if the innovation being adopted is congruent with  
12 clinical practice beliefs it can facilitate adoption.<sup>6</sup> Furthermore, the quality, quantity,  
13 and stability of available evidence to support the adoption or de-adoption of an  
14 innovation is likely important.<sup>46</sup> Although most providers in our study were aware of  
15 the evidence to support the adoption of LMWH for VTE prophylaxis and de-adoption  
16 of albumin for fluid resuscitation, they may not have perceived the evidence to be  
17 sufficient to warrant practice change. A growing awareness of challenges with  
18 reproducing scientific evidence and clinician experience with practice reversals<sup>42</sup> may  
19 result in more conservative provider behavior and slower practice change in response  
20 to new evidence. The suboptimal prescribing practices observed in our study likely  
21 represent a combination of all these factors.  
22  
23  
24  
25  
26  
27  
28  
29  
30  
31  
32  
33  
34  
35  
36  
37  
38  
39

40 One limitation of this study is that the survey used was imperfect. The results of the  
41 self-reported survey reflect perceived modifiers of practice among providers rather  
42 than factors shown to influence practice patterns as identified in observational  
43 studies.<sup>47</sup> The survey was purposefully designed to be simple and accessible to  
44 garner a representative perspective from all provider professions and therefore  
45 captured key concepts, but not granular data. Nevertheless, the survey has been  
46 successfully used for a similar purpose by others;<sup>30</sup> was reliable and reported to have  
47  
48  
49  
50  
51  
52  
53  
54  
55  
56  
57  
58  
59  
60



1  
2  
3 good clinical sensibility. Alternative methodologies such as qualitative analyses of  
4 semi-structured interviews may have allowed for more in depth exploration of barriers  
5 and facilitators to adopting LMWH and de-adopting albumin. Finally, while this study  
6 was a provincial and multi-site it was constrained to ICUs, which should be taken into  
7 consideration when interpreting our findings beyond this setting.  
8  
9  
10  
11  
12  
13  
14  
15  
16

17 In conclusion, our study provides several insights into similarities and differences  
18 between adoption of high value practices and de-adoption of low value practices. Both  
19 adoption and de-adoption of the illustrative example practices did not reflect  
20 healthcare providers' knowledge of the evidence. The use of best practices for both  
21 illustrative examples practices were less likely for patients with greater severity of  
22 illness and varied across institutions. We found that perceived barriers and facilitators  
23 are more similar than different between adoption and de-adoption, which suggests  
24 existing behavior change frameworks for adopting high value practices may also be  
25 applicable for de-adopting low value practices.  
26  
27  
28  
29  
30  
31  
32  
33  
34  
35  
36  
37  
38

### 39 **ACKNOWLEDGEMENTS**

40  
41  
42 KMS would like to acknowledge salary support from the O'Brien Institute for Public  
43 Health & Ward of the 21<sup>st</sup> Century within the Cumming School of Medicine at the  
44 University of Calgary, and the Canadian Institutes of Health Research. SB is  
45 supported by a Canada Research Chair in Critical Care Nephrology. DJC holds a  
46 Canada Research Chair in Knowledge Translation in the ICU. HTS is supported by a  
47 Population Health Investigator Award from Alberta Innovates and an Embedded  
48 Clinician Researcher Award from the Canadian Institutes of Health Research.  
49  
50  
51  
52  
53  
54  
55  
56  
57  
58  
59  
60

## **FUNDING**

This work was supported by a Partnership for Research and Innovation in Health Systems grant awarded by Alberta Innovates (Grant #201309 [HTS and SMB]).

## **DISCLOSURE OF CONFLICT OF INTERESTS**

The authors declare that they have no competing interests.

## **DATA SHARING STATEMENT**

Data will be available if accepted.

## **AUTHORS' CONTRIBUTIONS**

Dr. Sauro contributed to the design and conceptualization of the study; analysis and interpretation of the data, drafting and revising the manuscript and gave approval of the final version of the manuscript. No conflicts of interest to declare.

Dr. Bagshaw contributed to the design and conceptualization of the study, interpretation of the data, providing feedback on the manuscript, and gave approval of the final version of the manuscript. No conflicts of interest to declare.

Dr. Niven contributed to the design and conceptualization of the study, interpretation of the data, providing feedback on the manuscript, and gave approval of the final version of the manuscript. No conflicts of interest to declare.

1  
2  
3 Dr. Soo contributed to the analysis and interpretation of the data, providing feedback  
4  
5 on the manuscript and gave approval of the final version of the manuscript. No  
6  
7 conflicts of interest to declare.  
8  
9

10  
11  
12 Ms. Brundin-Mather contributed to the interpretation of the data, providing feedback  
13  
14 on the manuscript, and gave approval of the final version of the manuscript. No  
15  
16 conflicts of interest to declare.  
17  
18

19  
20  
21 Dr. Parsons Leigh contributed to the design and conceptualization of the study,  
22  
23 interpretation of the data, providing feedback on the manuscript, and gave approval of  
24  
25 the final version of the manuscript. No conflicts of interest to declare.  
26  
27

28  
29  
30  
31 Dr. Cook contributed to the design and conceptualization of the study, interpretation of  
32  
33 the data, providing feedback on the manuscript, and gave approval of the final version  
34  
35 of the manuscript. No conflicts of interest to declare.  
36  
37

38  
39  
40 Dr. Stelfox contributed to the design and conceptualization of the study, interpretation  
41  
42 of the data, providing feedback on the manuscript, and gave approval of the final  
43  
44 version of the manuscript. No conflicts of interest to declare.  
45  
46  
47  
48  
49  
50  
51  
52  
53  
54  
55  
56  
57  
58  
59  
60

## References

1. Institute of Medicine. Crossing the Quality Chiasm. Washington, DC: 2001.
2. Morris ZS, Wooding S, Grant J. The answer is 17 years, what is the question: understanding time lags in translational research. *J R Soc Med*. 2011;104:510-20.
3. Rogers EM. Lessons for guidelines from the diffusion of innovations. *Jt Comm J Qual Improv*. 1995;21:324-8.
4. Graham ID, Logan J, Harrison MB, et al. Lost in knowledge translation: time for a map? *J Contin Educ Health Prof*. 2006;26:13-24.
5. McCormack B, Kitson A, Harvey G, et al. Getting evidence into practice: the meaning of 'context'. *J Adv Nurs*. 2002;38:94-104.
6. Cabana MD, Rand CS, Powe NR, et al. Why don't physicians follow clinical practice guidelines? A framework for improvement. *Jama*. 1999;282:1458-65.
7. Niven DJ, Mrklas KJ, Holodinsky JK, et al. Towards understanding the de-adoption of low-value clinical practices: a scoping review. *BMC Med*. 2015;13:255.
8. van Bodegom-Vos L, Davidoff F, Marang-van de Mheen PJ. Implementation and de-implementation: two sides of the same coin? *BMJ Qual Saf*. 2017;26:495-501.
9. Rogers EM. The innovation-decision process. *Diffusion of Innovations*. 5 ed. New York, NY: Free Press; 2003.
10. Prasad V, Ioannidis JP. Evidence-based de-implementation for contradicted, unproven, and aspiring healthcare practices. *Implement Sci*. 2014;9:1.
11. Montini T, Graham ID. "Entrenched practices and other biases": unpacking the historical, economic, professional, and social resistance to de-implementation. *Implement Sci*. 2015;10:24.
12. Davidoff F. On the undiffusion of established practices. *JAMA Intern Med*. 2015;175:809-11.
13. Choosing Wisely Canada [January 16, 2017]. Available from: <http://www.choosingwiselycanada.org/>.
14. Choosing Wisely [January 16, 2017]. Available from: <http://www.choosingwisely.org/>.
15. Macleod MR, Michie S, Roberts I, et al. Biomedical research: increasing value, reducing waste. *Lancet*. 2014;383:101-4.
16. Grady D, Redberg RF. Less is more: how less health care can result in better health. *Arch Intern Med*. 2010;170:749-50.
17. Fowler RA, Mittmann N, Geerts W, et al. Cost-effectiveness of dalteparin vs unfractionated heparin for the prevention of venous thromboembolism in critically ill patients. *Jama*. 2014;312:2135-45.
18. Hirsh J, Raschke R. Heparin and low-molecular-weight heparin: the Seventh ACCP Conference on Antithrombotic and Thrombolytic Therapy. *Chest*. 2004;126:188s-203s.
19. Li G, Cook DJ, Levine MA, et al. Competing Risk Analysis for Evaluation of Dalteparin Versus Unfractionated Heparin for Venous Thromboembolism in Medical-Surgical Critically Ill Patients. *Medicine (Baltimore)*. 2015;94:e1479.
20. Alberta Health Services. Venous thromboembolism prophylaxis, clinical practice guideline (2016).

21. Rhodes A, Evans LE, Alhazzani W, et al. Surviving Sepsis Campaign: International Guidelines for Management of Sepsis and Septic Shock: 2016. *Critical Care Medicine*. 2017;45:486-552.
22. Finfer S, Bellomo R, Boyce N, et al. A comparison of albumin and saline for fluid resuscitation in the intensive care unit. *N Engl J Med*. 2004;350:2247-56.
23. Lyu PF, Hockenberry JM, Gaydos LM, et al. Impact of a Sequential Intervention on Albumin Utilization in Critical Care. *Crit Care Med*. 2016;44:1307-13.
24. Navickis RJ, Greenhalgh DG, Wilkes MM. Albumin in Burn Shock Resuscitation: A Meta-Analysis of Controlled Clinical Studies. *J Burn Care Res*. 2016;37:e268-78.
25. Patel A, Laffan MA, Waheed U, et al. Randomised trials of human albumin for adults with sepsis: systematic review and meta-analysis with trial sequential analysis of all-cause mortality. *Bmj*. 2014;349:g4561.
26. EASL clinical practice guidelines on the management of ascites, spontaneous bacterial peritonitis, and hepatorenal syndrome in cirrhosis. *J Hepatol*. 2010;53:397-417.
27. Bernardi M, Caraceni P, Navickis RJ, et al. Albumin infusion in patients undergoing large-volume paracentesis: a meta-analysis of randomized trials. *Hepatology*. 2012;55:1172-81.
28. Cavallin M, Kamath PS, Merli M, et al. Terlipressin plus albumin versus midodrine and octreotide plus albumin in the treatment of hepatorenal syndrome: A randomized trial. *Hepatology*. 2015;62:567-74.
29. Salerno F, Navickis RJ, Wilkes MM. Albumin infusion improves outcomes of patients with spontaneous bacterial peritonitis: a meta-analysis of randomized trials. *Clin Gastroenterol Hepatol*. 2013;11:123-30.e1.
30. Cook D, Duffett M, Lauzier F, et al. Barriers and facilitators of thromboprophylaxis for medical-surgical intensive care unit patients: a multicenter survey. *J Crit Care*. 2014;29:471.e1-9.
31. Parsons Leigh J, Niven DJ, Boyd JM, et al. Developing a framework to guide the de-adoption of low-value clinical practices in acute care medicine: a study protocol. *BMC Health Serv Res*. 2017;17:54.
32. Stelfox HT, Niven DJ, Clement FM, et al. Stakeholder Engagement to Identify Priorities for Improving the Quality and Value of Critical Care. *PLoS One*. 2015;10:e0140141.
33. PROTECT investigators. Dalteparin versus Unfractionated Heparin in Critically Ill Patients. *New England Journal of Medicine*. 2011;364:1305-14.
34. Alhazzani W, Lim W, Jaeschke RZ, et al. Heparin thromboprophylaxis in medical-surgical critically ill patients: a systematic review and meta-analysis of randomized trials. *Crit Care Med*. 2013;41:2088-98.
35. Sinuff T, Muscedere J, Adhikari NK, et al. Knowledge translation interventions for critically ill patients: a systematic review\*. *Crit Care Med*. 2013;41:2627-40.
36. Gershengorn HB, Wunsch H. Understanding changes in established practice: pulmonary artery catheter use in critically ill patients. *Crit Care Med*. 2013;41:2667-76.
37. Koo KK, Sun JC, Zhou Q, et al. Pulmonary artery catheters: evolving rates and reasons for use. *Crit Care Med*. 2011;39:1613-8.

- 1  
2  
3 38. Murphy DJ, Needham DM, Netzer G, et al. RBC transfusion practices among  
4 critically ill patients: has evidence changed practice? *Crit Care Med*. 2013;41:2344-53.  
5 39. Wiener RS, Welch HG. Trends in the use of the pulmonary artery catheter in  
6 the United States, 1993-2004. *Jama*. 2007;298:423-9.  
7 40. Munshi L, Gershengorn HB, Fan E, et al. Adjuvants to Mechanical Ventilation  
8 for Acute Respiratory Failure. Adoption, De-adoption, and Factors Associated with  
9 Selection. *Ann Am Thorac Soc*. 2017;14:94-102.  
10 41. Kahn JM, Le TQ. Adoption and de-adoption of drotrecogin alfa for severe  
11 sepsis in the United States. *J Crit Care*. 2016;32:114-9.  
12 42. Niven DJ, Rubenfeld GD, Kramer AA, et al. Effect of published scientific  
13 evidence on glycemic control in adult intensive care units. *JAMA Intern Med*.  
14 2015;175:801-9.  
15 43. Melnyk BM. Culture Eats Strategy Every Time: What Works in Building and  
16 Sustaining an Evidence-Based Practice Culture in Healthcare Systems. *Worldviews  
17 Evid Based Nurs*. 2016;13:99-101.  
18 44. Dodek P, Cahill NE, Heyland DK. The relationship between organizational  
19 culture and implementation of clinical practice guidelines: a narrative review. *JPEN J  
20 Parenter Enteral Nutr*. 2010;34:669-74.  
21 45. Menear M, Grindrod K, Clouston K, et al. Advancing knowledge translation in  
22 primary care. *Can Fam Physician*. 2012;58:623-7, e302-7.  
23 46. Scott IA, Elshaug AG. Foregoing low-value care: how much evidence is  
24 needed to change beliefs? *Intern Med J*. 2013;43:107-9.  
25 47. Lauzier F, Muscedere J, Deland E, et al. Thromboprophylaxis patterns and  
26 determinants in critically ill patients: a multicenter audit. *Crit Care*. 2014;18:R82.  
27  
28  
29  
30  
31  
32  
33  
34  
35  
36  
37  
38  
39  
40  
41  
42  
43  
44  
45  
46  
47  
48  
49  
50  
51  
52  
53  
54  
55  
56  
57  
58  
59  
60

1  
2  
3  
4 **Figure 1.** Barriers to the adoption of high value practices (low molecular weight  
5 heparin for venous thromboembolism prophylaxis) and de-adoption of low value  
6 practices (albumin for fluid resuscitation)  
7  
8  
9

10  
11  
12  
13 *Abbreviations:* ICU: intensive care unit  
14  
15

16  
17  
18  
19  
20  
21  
22  
23  
24  
25  
26  
27  
28  
29  
30  
31  
32  
33  
34  
35  
36  
37  
38  
39  
40  
41  
42  
43  
44  
45  
46  
47  
48  
49  
50  
51  
52  
53  
54  
55  
56  
57  
58  
59  
60

For peer review only

1  
2  
3  
4 **Figure 2a.** Barriers to the adoption of high value practices (low molecular weight  
5 heparin for venous thromboembolism prophylaxis) by professional group.  
6  
7

8  
9  
10 **Figure 2b.** Barriers to the de-adoption of low value practices (albumin for fluid  
11 resuscitation) by professional group  
12  
13

14  
15  
16 *Abbreviations:* **ICU**=intensive care unit, **NP**=nurse practitioner  
17  
18  
19  
20  
21  
22  
23  
24  
25  
26  
27  
28  
29  
30  
31  
32  
33  
34  
35  
36  
37  
38  
39  
40  
41  
42  
43  
44  
45  
46  
47  
48  
49  
50  
51  
52  
53  
54  
55  
56  
57  
58  
59  
60



1  
2  
3  
4 **Figure 3.** Facilitators to the adoption of high value practices (low molecular  
5 weight heparin for venous thromboembolism prophylaxis) and de-adoption of low  
6 value practices (albumin for fluid resuscitation)  
7  
8  
9  
10  
11  
12  
13  
14  
15

16 *Abbreviation:* **MD**=medical doctor, **QI**=quality improvement  
17  
18  
19  
20  
21  
22  
23  
24  
25  
26  
27  
28  
29  
30  
31  
32  
33  
34  
35  
36  
37  
38  
39  
40  
41  
42  
43  
44  
45  
46  
47  
48  
49  
50  
51  
52  
53  
54  
55  
56  
57  
58  
59  
60

1  
2  
3  
4  
5  
6  
7  
8  
9  
10  
11  
12  
13  
14  
15  
16  
17  
18  
19  
20  
21  
22  
23  
24  
25  
26  
27  
28  
29  
30  
31  
32  
33  
34  
35  
36  
37  
38  
39  
40  
41  
42  
43  
44  
45  
46  
47

**Figure 1.** Barriers to the adoption of high value practices (low molecular weight heparin for venous thromboembolism prophylaxis) and de-adoption of low value practices (albumin for fluid resuscitation)

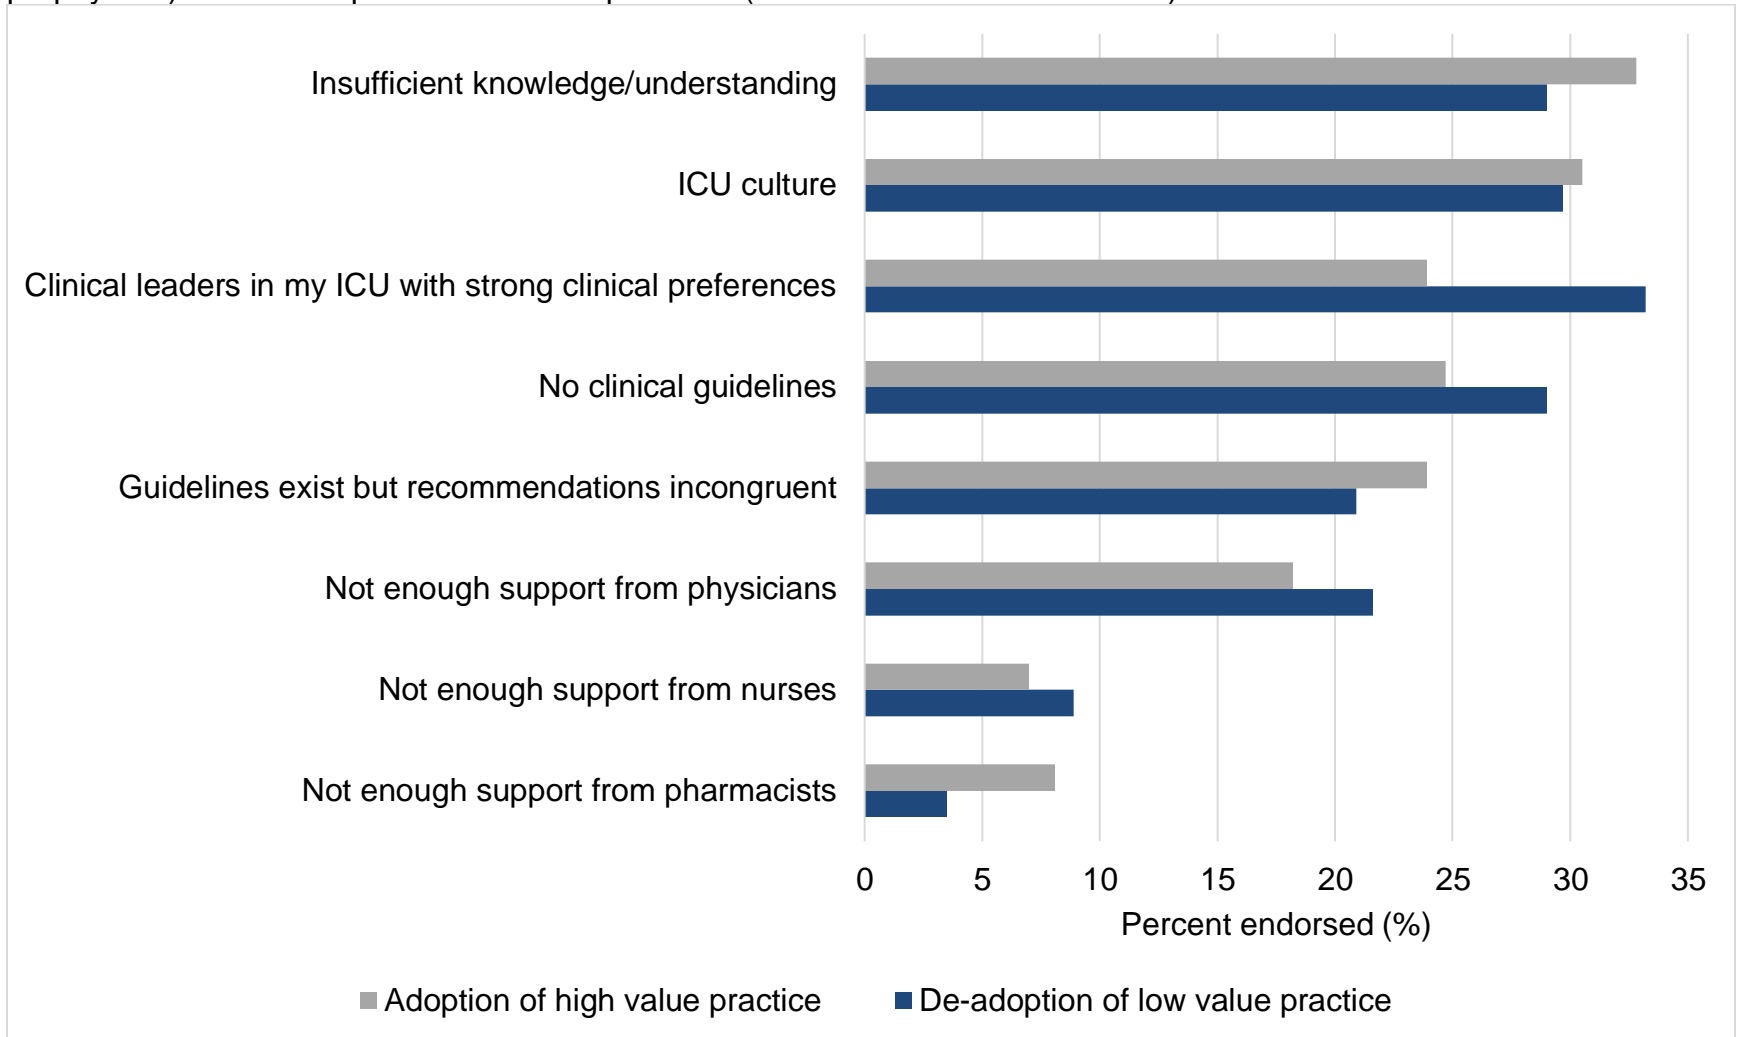

**Figure 2.** Barriers to adopting high value practices and de-adopting low value practices by profession

2.a) Barriers to adopting high value practices (LMWH for VTE prophylaxis) by professional group

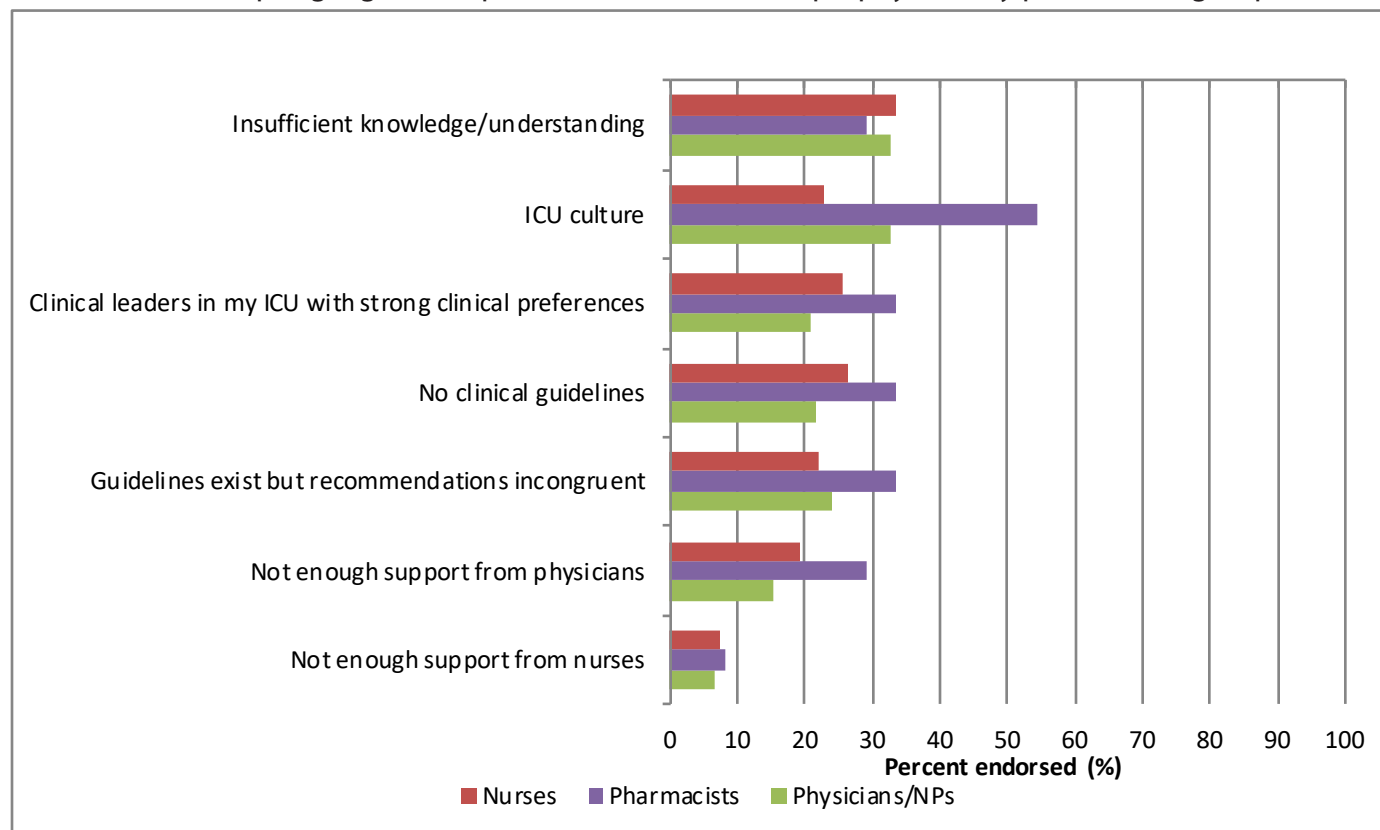

2.b) Barriers to de-adopting low value practices (albumin for fluid resuscitation) by professional group

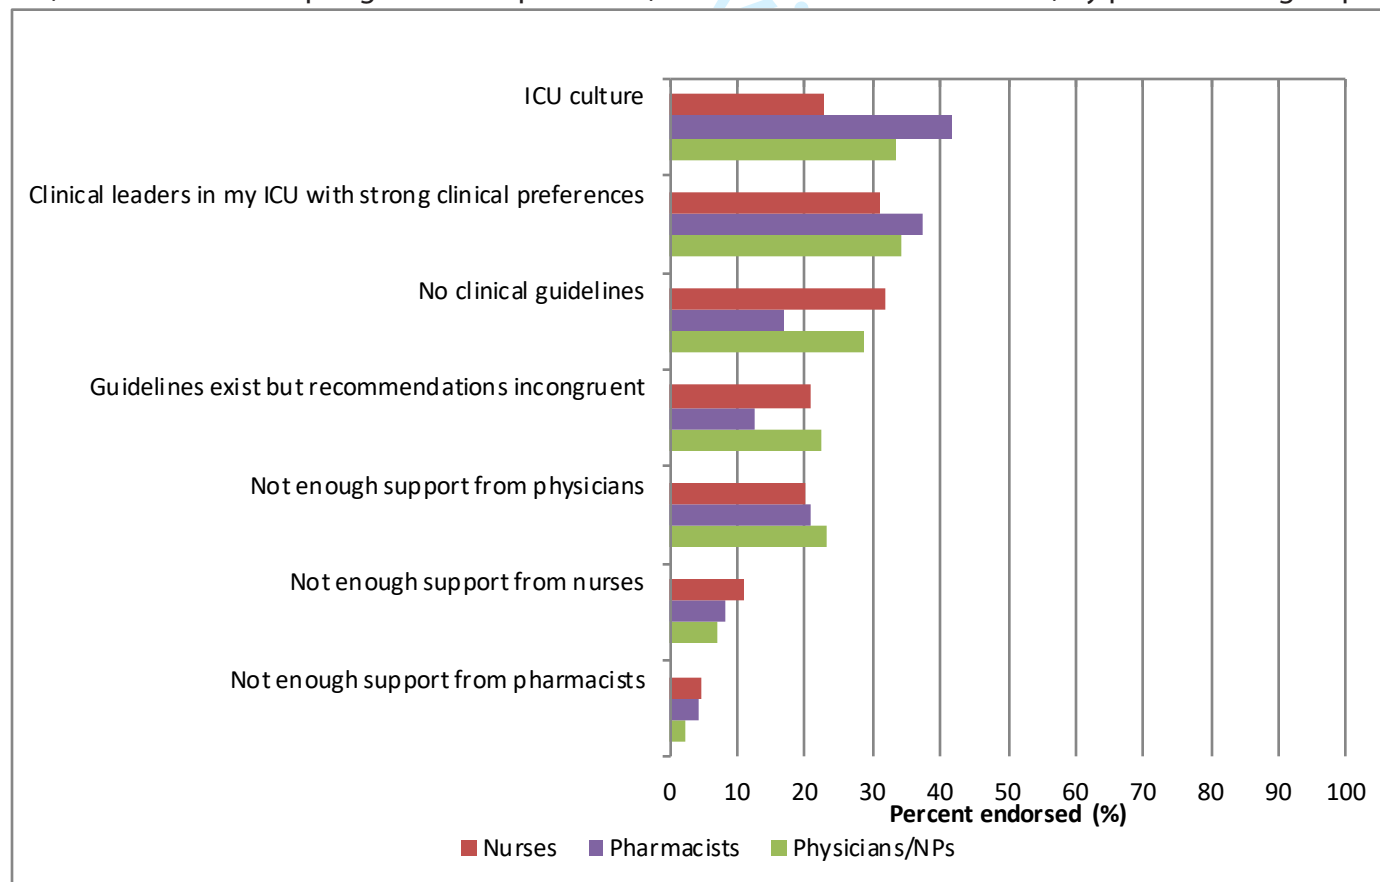

Abbreviations: ICU=intensive care unit; NP=nurse practitioner; LMWH=low molecular weight heparin; VTE=venous thromboembolism

**Figure 3.** Facilitators to the adoption of high value practices (low molecular weight heparin for venous thromboembolism prophylaxis) and de-adoption of low value practices (albumin for fluid resuscitation)

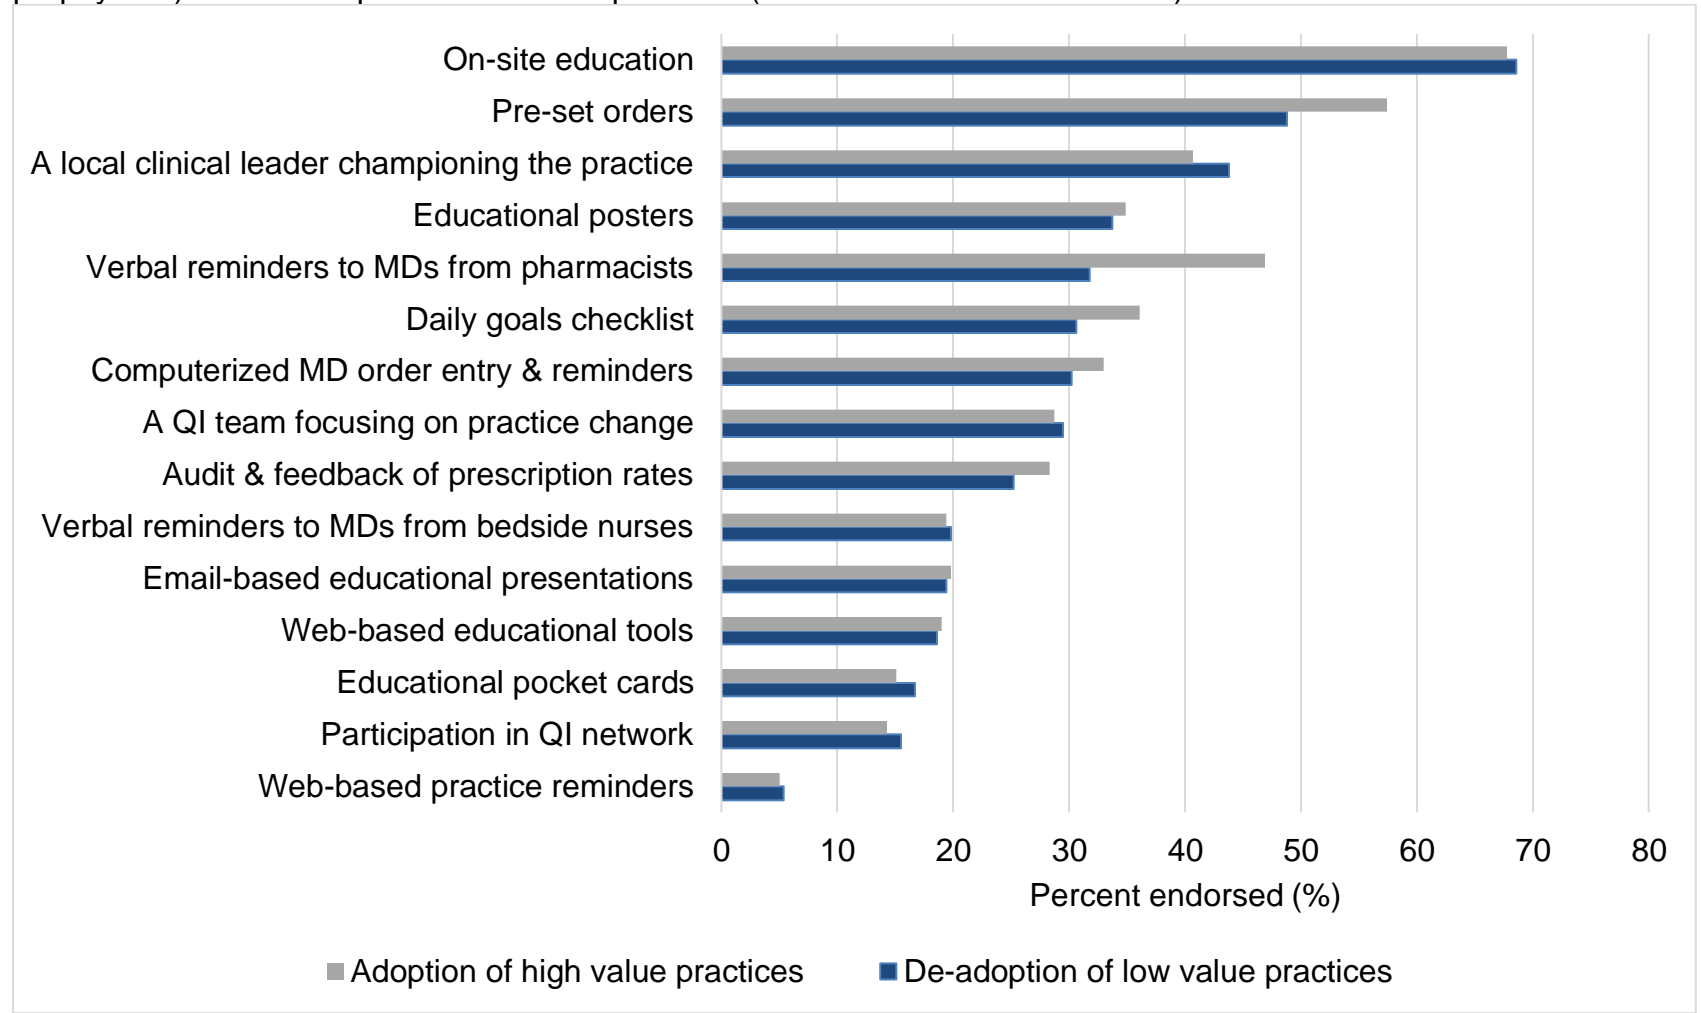

Abbreviation: MD=medical doctor, QI=quality improvement

**Supplemental Content 1.** List of diagnoses with a potential contraindication to receive pharmacological venous thromboembolism prophylaxis or indication for therapeutic anticoagulation\*

|                                                            |
|------------------------------------------------------------|
| Arteriovenous malformation, surgery for                    |
| Embolus, pulmonary                                         |
| GI Vascular insufficiency                                  |
| Grafts, removal of infected vascular                       |
| Neoplasm, neurologic                                       |
| Neoplasm-cranial, surgery for (excluding transphenoidal)   |
| Neoplasm-spinal cord surgery or other related procedures   |
| Neurologic surgery, other                                  |
| Subarachnoid hemorrhage/intracranial aneurysm              |
| Subarachnoid hemorrhage/intracranial aneurysm, surgery for |
| Thrombosis, vascular (deep vein)                           |
| Transphenoidal surgery                                     |
| Ulcer disease, peptic                                      |
| Abdomen only trauma                                        |
| Abdomen only trauma, surgery for                           |
| Abdomen/extremity trauma                                   |
| Abdomen/extremity trauma, surgery for                      |
| Abdomen/face trauma                                        |
| Abdomen/face trauma, surgery for                           |
| Abdomen/multiple trauma                                    |
| Abdomen/multiple trauma, surgery for                       |
| Abdomen/pelvis trauma, surgery for                         |
| Abscess/infection-cranial, surgery for                     |
| Anastomosis, vascular                                      |
| Aneurysm, abdominal aortic                                 |
| Aneurysm, abdominal aortic; with dissection                |
| Aneurysm, abdominal aortic; with rupture                   |
| Aneurysm, dissecting aortic                                |
| Aneurysm, thoracic aortic                                  |
| Aneurysm, thoracic aortic; with dissection                 |
| Aneurysm, thoracic aortic; with rupture                    |
| Aneurysm/pseudoaneurysm, other                             |
| Aneurysms, repair of other (except ventricular)            |
| Biopsy, brain                                              |
| Bleeding, GI from esophageal varices/portal hypertension   |
| Bleeding, GI-location unknown                              |
| Bleeding, lower GI                                         |
| Bleeding, upper GI                                         |
| Bleeding-lower GI, surgery for                             |
| Bleeding-other GI, surgery for                             |
| Bleeding-upper GI, surgery for                             |

|    |                                                                                                                                                                                    |
|----|------------------------------------------------------------------------------------------------------------------------------------------------------------------------------------|
| 1  |                                                                                                                                                                                    |
| 2  |                                                                                                                                                                                    |
| 3  | Burr hole placement                                                                                                                                                                |
| 4  | CABG alone, coronary artery bypass grafting                                                                                                                                        |
| 5  | CVA, cerebrovascular accident/stroke                                                                                                                                               |
| 6  | Chest/abdomen trauma                                                                                                                                                               |
| 7  | Chest/abdomen trauma, surgery for                                                                                                                                                  |
| 8  | Chest/abdomen trauma, surgery for                                                                                                                                                  |
| 9  | Chest/extremity trauma                                                                                                                                                             |
| 10 | Chest/extremity trauma, surgery for                                                                                                                                                |
| 11 | Chest/extremity trauma, surgery for                                                                                                                                                |
| 12 | Chest/face trauma                                                                                                                                                                  |
| 13 | Chest/face trauma, surgery for                                                                                                                                                     |
| 14 | Chest/face trauma, surgery for                                                                                                                                                     |
| 15 | Chest/multiple trauma                                                                                                                                                              |
| 16 | Chest/multiple trauma, surgery for                                                                                                                                                 |
| 17 | Chest/multiple trauma, surgery for                                                                                                                                                 |
| 18 | Chest/pelvis trauma                                                                                                                                                                |
| 19 | Chest/pelvis trauma, surgery for                                                                                                                                                   |
| 20 | Chest/pelvis trauma, surgery for                                                                                                                                                   |
| 21 | Chest/spinal trauma                                                                                                                                                                |
| 22 | Chest/spinal trauma, surgery for                                                                                                                                                   |
| 23 | Chest/spinal trauma, surgery for                                                                                                                                                   |
| 24 | Chest/thorax only trauma                                                                                                                                                           |
| 25 | Chest/thorax only trauma, surgery for                                                                                                                                              |
| 26 | Chest/thorax only trauma, surgery for                                                                                                                                              |
| 27 | Coagulopathy                                                                                                                                                                       |
| 28 | Complications of prev. peripheral vasc. surgery, surgery for (i.e.ligation of bleeder, exploration and evacuation of hematoma, debridement, pseudoaneurysms, clots, fistula, etc.) |
| 29 | Complications of previous GI surgery; surgery for (anastomotic leak, bleeding, abscess, infection, dehiscence, etc.)                                                               |
| 30 | Complications of previous spinal cord surgery, surgery for                                                                                                                         |
| 31 | Cranioplasty and complications from previous craniotomies                                                                                                                          |
| 32 | Cranioplasty and complications from previous craniotomies                                                                                                                          |
| 33 | Head (CNS) only trauma                                                                                                                                                             |
| 34 | Head (CNS) only trauma, surgery for                                                                                                                                                |
| 35 | Head (CNS) only trauma, surgery for                                                                                                                                                |
| 36 | Head/abdomen trauma                                                                                                                                                                |
| 37 | Head/abdomen trauma, surgery for                                                                                                                                                   |
| 38 | Head/abdomen trauma, surgery for                                                                                                                                                   |
| 39 | Head/chest trauma                                                                                                                                                                  |
| 40 | Head/chest trauma, surgery for                                                                                                                                                     |
| 41 | Head/chest trauma, surgery for                                                                                                                                                     |
| 42 | Head/extremity trauma                                                                                                                                                              |
| 43 | Head/extremity trauma, surgery for                                                                                                                                                 |
| 44 | Head/extremity trauma, surgery for                                                                                                                                                 |
| 45 | Head/face trauma                                                                                                                                                                   |
| 46 | Head/face trauma, surgery for                                                                                                                                                      |
| 47 | Head/face trauma, surgery for                                                                                                                                                      |
| 48 | Head/multiple trauma                                                                                                                                                               |
| 49 | Head/multiple trauma, surgery for                                                                                                                                                  |
| 50 | Head/multiple trauma, surgery for                                                                                                                                                  |
| 51 | Head/pelvis trauma                                                                                                                                                                 |
| 52 | Head/pelvis trauma, surgery for                                                                                                                                                    |
| 53 | Head/pelvis trauma, surgery for                                                                                                                                                    |
| 54 | Head/spinal trauma                                                                                                                                                                 |
| 55 | Head/spinal trauma, surgery for                                                                                                                                                    |
| 56 | Head/spinal trauma, surgery for                                                                                                                                                    |
| 57 | Hematoma, epidural                                                                                                                                                                 |
| 58 | Hematoma, epidural, surgery for                                                                                                                                                    |
| 59 | Hematoma, epidural, surgery for                                                                                                                                                    |
| 60 | Hematoma, subdural                                                                                                                                                                 |
|    | Hematoma, subdural, surgery for                                                                                                                                                    |

|    |                                                                             |
|----|-----------------------------------------------------------------------------|
| 1  |                                                                             |
| 2  |                                                                             |
| 3  | Hematomas                                                                   |
| 4  | Hemorrhage (for gastrointestinal bleeding GI-see GI system) (for trauma see |
| 5  | Trauma)                                                                     |
| 6  | Hemorrhage, intra/retroperitoneal                                           |
| 7  | Hemorrhage, postpartum (female only)                                        |
| 8  | Hemorrhage/hematoma, intracranial                                           |
| 9  | Hemorrhage/hematoma-intracranial, surgery for                               |
| 10 | Hemorrhage/hemoptysis, pulmonary                                            |
| 11 | Hemothorax                                                                  |
| 12 | Pelvis/extremity trauma                                                     |
| 13 | Pelvis/extremity trauma, surgery for                                        |
| 14 | Pelvis/face trauma                                                          |
| 15 | Pelvis/hip only trauma, surgery for                                         |
| 16 | Pelvis/multiple trauma, surgery for                                         |
| 17 | Pelvis/spinal trauma                                                        |
| 18 | Pericardial effusion/tamponade                                              |
| 19 | Renal bleeding                                                              |
| 20 | Spinal cord only trauma, surgery for                                        |
| 21 | Spinal cord surgery, other                                                  |
| 22 | Stereotactic procedure                                                      |
| 23 | Subarachnoid hemorrhage/arteriovenous malformation                          |
| 24 | Tamponade, pericardial                                                      |
| 25 |                                                                             |
| 26 |                                                                             |
| 27 |                                                                             |
| 28 |                                                                             |
| 29 |                                                                             |
| 30 |                                                                             |
| 31 |                                                                             |
| 32 |                                                                             |
| 33 |                                                                             |
| 34 |                                                                             |
| 35 |                                                                             |
| 36 |                                                                             |
| 37 |                                                                             |
| 38 |                                                                             |
| 39 |                                                                             |
| 40 |                                                                             |
| 41 |                                                                             |
| 42 |                                                                             |
| 43 |                                                                             |
| 44 |                                                                             |
| 45 |                                                                             |
| 46 |                                                                             |
| 47 |                                                                             |
| 48 |                                                                             |
| 49 |                                                                             |
| 50 |                                                                             |
| 51 |                                                                             |
| 52 |                                                                             |
| 53 |                                                                             |
| 54 |                                                                             |
| 55 |                                                                             |
| 56 |                                                                             |
| 57 |                                                                             |
| 58 |                                                                             |
| 59 |                                                                             |
| 60 |                                                                             |

*\*Footnote:* The primary diagnoses were reviewed independently by two ICU physicians (HTS, DJN). The two ICU physicians provided their judgment to establish a conservative list of primary diagnoses in order to exclude patients that may have a contraindication for pharmacological VTE prophylaxis based on bleeding risk and an indication for therapeutic anticoagulation. Discrepancies were resolved by discussion.

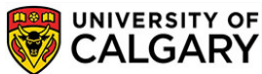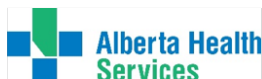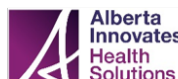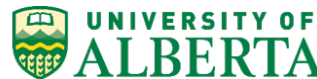

## Adopting Best Practices in DVT/PE Prophylaxis and Fluid Resuscitation in Critical Care

[http://fluidsurveys.com/s/ECG\\_facilitators\\_barriers\\_survey/](http://fluidsurveys.com/s/ECG_facilitators_barriers_survey/)

### Informed Consent

This survey is to identify and evaluate barriers to, and facilitators of, best practices in:

1. Deep Vein Thrombosis (DVT) / Pulmonary Embolism (PE) prophylaxis for medical-surgical ICU patients, and
2. Fluid Resuscitation for medical-surgical ICU patients *without* liver disease, bacterial peritonitis, hepatorenal syndrome or therapeutic paracentesis.

**This survey is not about trauma, neurosurgery or cardiac surgery patients.** Survey responses will be used to develop interventions to facilitate the adoption of best practices in Alberta ICUs.

You are being asked to take part in this survey because you are a healthcare professional working in adult critical care in Alberta. Our survey can be answered in approximately **5 minutes**. There are no direct benefits and/or risks to your participation.

Survey respondents can choose to have their name entered into a draw for \$20 Starbucks gift cards (one name will be drawn per week; non-winners will remain in the draw each week).

Your participation in this survey is voluntary and you are free to stop at any time. Your responses will be kept confidential. Your de-identified data will be stored in a password-protected database, and responses will only be presented in aggregate. The survey has peer-reviewed funding and has received ethics approval from the University of Calgary. **Your decision to complete and submit this survey will indicate your consent to participate.** Should you decide to withdraw your participation before submitting the survey, your data will be deleted.

If you have questions about this survey or your participation, please contact:

Rebecca Brundin-Mather, Research Coordinator, at [brundin@ucalgary.ca](mailto:brundin@ucalgary.ca).

If you have questions about your rights as a participant, you may contact the University of Calgary Conjoint Research Ethics Board at (403) 220-7990. This office is not affiliated with the study team.

Thank you in advance for taking the time to complete the survey!

Kind regards,

Tom Stelfox, MD, PhD, FRCPC

Intensive Care Physician

Scientific Director, AHS, Critical Care Strategic Clinical Network

I agree to participate in this survey       I do **NOT** wish to participate in this survey (online-version)



## Demographics

### 1. What is your professional group?

- ICU physician       Nurse Clinician       Pharmacist  
 ICU resident       Nurse Educator       Other: \_\_\_\_\_  
 ICU fellow       Bedside Nurse

### 2. Approximately how many years have you worked in:

Health care       Critical care

### 3. In which hospital(s) do you primarily work? (Select all that apply)

- Chinook Regional Hospital  
 Foothills Medical Centre  
 Grand Prairie QE II Hospital  
 Grey Nuns Hospital  
 Medicine Hat Regional Hospital  
 Misericordia Hospital  
 Northern Lights Regional Health Centre  
 Peter Lougheed Centre  
 Red Deer Regional Hospital  
 Rockyview General Hospital  
 Royal Alexander Hospital  
 South Health Campus  
 Sturgeon Community Hospital  
 University of Alberta Hospital

## DVT/PE Prevention

We are interested in your perceptions of the different forms of prophylaxes commonly used to prevent Deep Vein Thrombosis (DVT) and Pulmonary Embolism (PE) in medical-surgical ICU patients (not trauma, neurosurgery or cardiac surgery patients). Common prophylaxes include:

- Low molecular weight heparin (**LMWH** e.g., Enoxaparin, Dalteparin, Tinzaparin)
- Unfractionated heparin (**UFH**, regular Heparin)
- **Mechanical** prophylaxis (i.e., sequential compression devices)

We appreciate that practices vary across units and providers. For each of the following questions, please select the **best response option** OR **options**, to the best of your knowledge (more than one response option can be selected).

4. Which form(s) of prophylaxis is/are most effective at preventing:

|                            | LMWH                     | UFH                      | Mechanical               | Unsure                   |
|----------------------------|--------------------------|--------------------------|--------------------------|--------------------------|
| Deep Vein Thrombosis (DVT) | <input type="checkbox"/> | <input type="checkbox"/> | <input type="checkbox"/> | <input type="checkbox"/> |
| Pulmonary Embolism (PE)    | <input type="checkbox"/> | <input type="checkbox"/> | <input type="checkbox"/> | <input type="checkbox"/> |

5. Which form(s) of prophylaxis is/are most cost-effective?

| LMWH                     | UFH                      | Mechanical               | Unsure                   |
|--------------------------|--------------------------|--------------------------|--------------------------|
| <input type="checkbox"/> | <input type="checkbox"/> | <input type="checkbox"/> | <input type="checkbox"/> |

6. Which form(s) of *pharmacological* prophylaxis has/have the lowest risk of:

|                                        | LMWH                     | UFH                      | Unsure                   |
|----------------------------------------|--------------------------|--------------------------|--------------------------|
| Bleeding                               | <input type="checkbox"/> | <input type="checkbox"/> | <input type="checkbox"/> |
| Heparin Induced Thrombocytopenia (HIT) | <input type="checkbox"/> | <input type="checkbox"/> | <input type="checkbox"/> |

7. To what extent do you think best practices for preventing DVT/PE are followed in your ICU (i.e., the patient receives the right prophylaxis with the right dose at the right time)?

|                       |                       |                       |                       |                       |                       |                       |                       |
|-----------------------|-----------------------|-----------------------|-----------------------|-----------------------|-----------------------|-----------------------|-----------------------|
| <input type="radio"/> |
| <b>1</b>              | <b>2</b>              | <b>3</b>              | <b>4</b>              | <b>5</b>              | <b>6</b>              | <b>7</b>              | Unsure                |
| <b>Never</b>          | <b>Sometimes</b>      |                       |                       | <b>Always</b>         |                       |                       |                       |

**Intravenous Fluid Resuscitation**

We are now interested in your perceptions of the different types of intravenous fluids commonly used for fluid resuscitation (i.e., fluid boluses) in the ICU for medical-surgical patients, **excluding** patients with liver disease, bacterial peritonitis, or undergoing therapeutic paracentesis as they may have different fluid needs. Common resuscitation fluids include:

- **Human Albumin** (Albumin 5% or Albumin 25%)
- **Crystalloid solutions** (e.g., normal saline, ringers lactate, and plasma-lyte)

Again, we appreciate that clinical practices vary across units and providers. For each of the following questions, please select the **best response option** OR **options**, to the best of your knowledge (more than one response option can be selected).

8. Which form(s) of IV resuscitation fluid is/are most effective for resuscitation?

Albumin                       Crystalloids                       Unsure

9. Which form(s) of IV resuscitation fluid(s) is/are most cost-effective?

Albumin                       Crystalloids                       Unsure

10. Which form(s) of IV resuscitation fluid(s) has/have the lowest risk of:

|                                         | Albumin                  | Crystalloids             | Unsure                   |
|-----------------------------------------|--------------------------|--------------------------|--------------------------|
| Fluid overload (peripheral / pulmonary) | <input type="checkbox"/> | <input type="checkbox"/> | <input type="checkbox"/> |
| Contracting an infectious disease       | <input type="checkbox"/> | <input type="checkbox"/> | <input type="checkbox"/> |

11. To what extent do you think *best practices* for prescribing fluid boluses are followed **in your ICU** (i.e., the patient receives the right fluid with the right dose at the right time)?

|                       |                       |                       |                       |                       |                       |                       |                       |
|-----------------------|-----------------------|-----------------------|-----------------------|-----------------------|-----------------------|-----------------------|-----------------------|
| <input type="radio"/> |
| <b>1</b>              | <b>2</b>              | <b>3</b>              | <b>4</b>              | <b>5</b>              | <b>6</b>              | <b>7</b>              | Unsure                |
| <b>Never</b>          |                       |                       | <b>Sometimes</b>      |                       |                       | <b>Always</b>         |                       |

### **Barriers to Best Practices**

A number of ICU or 'systems' factors have been identified as potential barriers to best practices. We are interested in what you think are barriers **in your ICU** to prescribing:

1. LMWH over UFH for DVT/PE prophylaxis
2. Crystalloid solutions over Albumin for fluid resuscitation

12. Which of the following factors are current barriers in your ICU to prescribing...

|                                                                                                                                  | <b>LMWH over UFH</b>   |                       | <b>Crystalloids over Albumin</b> |                       |
|----------------------------------------------------------------------------------------------------------------------------------|------------------------|-----------------------|----------------------------------|-----------------------|
|                                                                                                                                  | <b>Current Barrier</b> | Unsure                | <b>Current Barrier</b>           | Unsure                |
| An ICU culture with an unclear or slow process for practice change                                                               | <input type="radio"/>  | <input type="radio"/> | <input type="radio"/>            | <input type="radio"/> |
| Not enough support from physicians                                                                                               | <input type="radio"/>  | <input type="radio"/> | <input type="radio"/>            | <input type="radio"/> |
| Not enough support from nurses                                                                                                   | <input type="radio"/>  | <input type="radio"/> | <input type="radio"/>            | <input type="radio"/> |
| Not enough support from pharmacists                                                                                              | <input type="radio"/>  | <input type="radio"/> | <input type="radio"/>            | <input type="radio"/> |
| Clinical leaders in my ICU with strong clinical preferences                                                                      | <input type="radio"/>  | <input type="radio"/> | <input type="radio"/>            | <input type="radio"/> |
| No clinical guidelines or orders sets in my ICU to guide the practice                                                            | <input type="radio"/>  | <input type="radio"/> | <input type="radio"/>            | <input type="radio"/> |
| Guidelines exist in my ICU, but they do not recommend LMWH over UFH / crystalloids over albumin                                  | <input type="radio"/>  | <input type="radio"/> | <input type="radio"/>            | <input type="radio"/> |
| Insufficient knowledge/understanding the evidence base for the practice.                                                         | <input type="radio"/>  | <input type="radio"/> | <input type="radio"/>            | <input type="radio"/> |
| <b>None</b> of the above factors are current barriers in my ICU to prescribing....                                               | <input type="radio"/>  |                       | <input type="radio"/>            |                       |
| Please note any other factors that may be barriers to prescribing LMWH over UFH and/or crystalloids over albumin. Specify below. |                        |                       |                                  |                       |

### Strategies to Encourage Best Practices

A number of strategies have been identified as potential facilitators to changing clinical practice. We are interested in your perceptions of different strategies that have been used to encourage:

1. LMWH over UFH for DVT/PE prophylaxis
2. Crystalloid solutions over Albumin for fluid resuscitation

13. Which of the following strategies are currently used in your ICU to encourage...

|                                                                                  | LMWH over UFH         | Crystalloids over Albumin |
|----------------------------------------------------------------------------------|-----------------------|---------------------------|
| 1. On-site education (in-services, rounds, journal clubs, orientations)          | <input type="radio"/> | <input type="radio"/>     |
| 2. Educational posters (in the unit)                                             | <input type="radio"/> | <input type="radio"/>     |
| 3. Educational pocket cards                                                      | <input type="radio"/> | <input type="radio"/>     |
| 4. Email-based educational presentations                                         | <input type="radio"/> | <input type="radio"/>     |
| 5. Web-based educational tools                                                   | <input type="radio"/> | <input type="radio"/>     |
| 6. Verbal reminders to physicians from pharmacists                               | <input type="radio"/> | <input type="radio"/>     |
| 7. Verbal reminders to physicians from bedside nurses                            | <input type="radio"/> | <input type="radio"/>     |
| 8. Pre-set orders                                                                | <input type="radio"/> | <input type="radio"/>     |
| 9. Computerized physician order entry & reminders                                | <input type="radio"/> | <input type="radio"/>     |
| 10. Web-based practice reminders                                                 | <input type="radio"/> | <input type="radio"/>     |
| 11. Daily goals checklist                                                        | <input type="radio"/> | <input type="radio"/>     |
| 12. Audit & feedback of prescription rates                                       | <input type="radio"/> | <input type="radio"/>     |
| 13. A quality improvement team focusing on practice change                       | <input type="radio"/> | <input type="radio"/>     |
| 14. Participation in a quality improvement network                               | <input type="radio"/> | <input type="radio"/>     |
| 15. A local clinical leader championing the practice                             | <input type="radio"/> | <input type="radio"/>     |
| 16. Other strategy used. Please specify:                                         | <input type="radio"/> | <input type="radio"/>     |
| 17. Other strategy used. Please specify:                                         | <input type="radio"/> | <input type="radio"/>     |
| <b>NO</b> strategies are currently being used in my ICU encourage this practice: | <input type="radio"/> | <input type="radio"/>     |

1  
2  
3  
4  
5  
6  
7  
8  
9  
10  
11  
12  
13  
14  
15  
16  
17  
18  
19  
20  
21  
22  
23  
24  
25  
26  
27  
28  
29  
30  
31  
32  
33  
34  
35  
36  
37  
38  
39  
40  
41  
42  
43  
44  
45  
46  
47  
48  
49  
50  
51  
52  
53  
54  
55  
56  
57  
58  
59  
60

14. From the same list of strategies, please select the **5 best strategies** that you believe would work **in your ICU** to encourage:

(1) LMWH over UFH for DVT/PE prophylaxis

(2) Crystalloid solutions over Albumin for fluid resuscitation

(Select up to 5 strategies, regardless whether the strategy is used in your ICU or not)

**Select up to 5 in each column**

| Strategy to change clinical practice                                    | LMWH over UFH            | Crystalloids over Albumin |
|-------------------------------------------------------------------------|--------------------------|---------------------------|
| 1. On-site education (in-services, rounds, journal clubs, orientations) | <input type="checkbox"/> | <input type="checkbox"/>  |
| 2. Educational posters (in the unit)                                    | <input type="checkbox"/> | <input type="checkbox"/>  |
| 3. Educational pocket cards                                             | <input type="checkbox"/> | <input type="checkbox"/>  |
| 4. Email-based educational presentations                                | <input type="checkbox"/> | <input type="checkbox"/>  |
| 5. Web-based educational tools                                          | <input type="checkbox"/> | <input type="checkbox"/>  |
| 6. Verbal reminders to physicians from pharmacists                      | <input type="checkbox"/> | <input type="checkbox"/>  |
| 7. Verbal reminders to physicians from bedside nurses                   | <input type="checkbox"/> | <input type="checkbox"/>  |
| 8. Pre-set orders                                                       | <input type="checkbox"/> | <input type="checkbox"/>  |
| 9. Computerized physician order entry & reminders                       | <input type="checkbox"/> | <input type="checkbox"/>  |
| 10. Web-based practice reminders                                        | <input type="checkbox"/> | <input type="checkbox"/>  |
| 11. Daily goals checklist                                               | <input type="checkbox"/> | <input type="checkbox"/>  |
| 12. Audit & feedback of prescription rates                              | <input type="checkbox"/> | <input type="checkbox"/>  |
| 13. A quality improvement team to focus on practice change              | <input type="checkbox"/> | <input type="checkbox"/>  |
| 14. Participation in a quality improvement network                      | <input type="checkbox"/> | <input type="checkbox"/>  |
| 15. A local clinical leader to champion the practice                    | <input type="checkbox"/> | <input type="checkbox"/>  |
| 16. Other strategy. Please specify:                                     | <input type="checkbox"/> | <input type="checkbox"/>  |
| 17. Other strategy. Please specify:                                     | <input type="checkbox"/> | <input type="checkbox"/>  |

1  
2  
3 15. Finally, please provide any additional comments in the text box below.  
4  
5

6  
7  
8  
9  
10  
11  
12

13  
14  
15 Please select the check box(es) below to have your name entered in the Starbucks coffee card  
16 draws and/or to receive the study results.  
17

- 18  
19  Yes, I would like my name entered in the coffee card draws.  
20  
21  Yes, I would like to receive the results from this study.  
22  
23

24  
25 My email address is:  
26

27  
28 N.B. E-mail addresses will be kept confidential and will not be used to contact you for any  
29 reason other than those noted above.  
30

31  
32

33  
34  
35  
36 ---End of Survey ---  
37

38  
39  
40 **Thank you for helping us improve care!**  
41

42  
43 **Please return completed surveys to:**  
44

45  
46 Dr. Tom Stelfox  
47 Department of Critical Care Medicine  
48 Foothills Medical Centre  
49

OR

Rebecca Brundin-Mather  
Ward of the 21<sup>st</sup> Century  
GD01 Teaching, Research, Wellness Bldg  
University of Calgary, 3280 Hospital Dr NW  
Calgary, AB T2N 4Z6

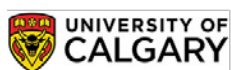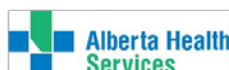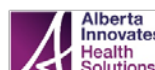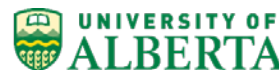

**Supplemental Content 3.** Intensive care unit patient characteristics for the study period (January 1, 2014-December 31, 2014)

| <b>Demographic variable</b>     | <b>Population<br/>(N=6,946)</b> | <b>Adoption cohort<br/>70.7%<br/>(N=4,931)</b> | <b>De-adoption<br/>cohort<br/>93.1%<br/>(N=6,467)</b> |
|---------------------------------|---------------------------------|------------------------------------------------|-------------------------------------------------------|
| Age, median (IQR)               | 60 (46-71)                      | 61 (47-71)                                     | 61 (46-71)                                            |
| Female                          | 41.6 (2,888)                    | 43.3 (2,134)                                   | 41.8 (2,703)                                          |
| Comorbidities                   |                                 |                                                |                                                       |
| AIDS                            | 0.6 (42)                        | 0.7 (33)                                       | 0.5 (35)                                              |
| Chronic dialysis                | 3.5 (240)                       | 3.8 (186)                                      | 3.5 (225)                                             |
| Chronic heart failure           | 6.4 (444)                       | 7.4 (364)                                      | 6.5 (419)                                             |
| Cirrhosis                       | 5.9 (407)                       | 6.0 (294)                                      | 0.0 (0)                                               |
| Diabetes                        | 19.7 (1,366)                    | 21.6 (1,065)                                   | 19.9 (1,284)                                          |
| Hepatic failure                 | 3.9 (269)                       | 4.1 (203)                                      | 0.0 (0)                                               |
| Immune suppression              | 8.5 (589)                       | 9.4 (463)                                      | 8.2 (532)                                             |
| Leukemia or multiple<br>myeloma | 1.3 (88)                        | 1.4 (69)                                       | 1.3 (86)                                              |
| Lymphoma                        | 1.1 (77)                        | 1.2 (61)                                       | 1.2 (75)                                              |
| Metastatic cancer               | 3.9 (272)                       | 4.1 (203)                                      | 4.1 (262)                                             |
| Respiratory insufficiency       | 12.0 (833)                      | 14.6 (722)                                     | 12.5 (810)                                            |
| Any comorbidity                 | 44.6 (3,100)                    | 49.3 (2,431)                                   | 40.6 (2,625)                                          |
| Admitted from                   |                                 |                                                |                                                       |
| Emergency department            | 36.6 (2,540)                    | 36.7 (1,808)                                   | 36.5 (2,358)                                          |
| Operating / recovery room       | 21.9 (1,520)                    | 18.3 (902)                                     | 22.2 (1,437)                                          |
| Hospital ward                   | 26.7 (1,858)                    | 28.1 (1,386)                                   | 26.3 (1,702)                                          |
| Other hospital                  | 10.4 (722)                      | 11.9 (589)                                     | 10.5 (677)                                            |
| Other location                  | 4.3 (300)                       | 4.9 (243)                                      | 4.5 (288)                                             |
| Unknown                         | 0.1 (6)                         | 0.1 (3)                                        | 0.1 (5)                                               |
| Admission type                  |                                 |                                                |                                                       |



|                                                         |                 |                 |                 |
|---------------------------------------------------------|-----------------|-----------------|-----------------|
| Elective surgery                                        | 9.4 (655)       | 8.1 (399)       | 9.5 (614)       |
| Emergent surgery                                        | 16.8 (1,170)    | 13.8 (681)      | 17.3 (1,120)    |
| No surgery                                              | 73.1 (5,078)    | 78.1 (3,851)    | 72.5 (4,690)    |
| Unknown                                                 | 0.6 (43)        | 0.0 (0)         | 0.7 (43)        |
| Reason for ICU admission                                |                 |                 |                 |
| Medical                                                 | 59.9 (4,163)    | 69.4 (3,420)    | 58.7 (3,797)    |
| Surgical                                                | 25.8 (1,789)    | 24.1 (1,190)    | 26.2 (1,696)    |
| Neurological                                            | 9.3 (649)       | 4.1 (200)       | 9.8 (632)       |
| Trauma                                                  | 4.3 (302)       | 2.5 (121)       | 4.6 (299)       |
| Unknown                                                 | 0.6 (43)        | 0.0 (0)         | 0.7 (43)        |
| APACHE II Score on ICU admission, median (IQR)          | 19 (14-26)      | 20 (15-26)      | 19 (14-25)      |
| Glasgow Coma Scale score on ICU admission, median (IQR) | 14 (11-15)      | 14 (11-15)      | 14 (11-15)      |
| Intubation                                              | 65.5 (4,553)    | 66.2 (3,264)    | 64.9 (4,195)    |
| Invasive ventilation                                    | 68.3 (4,747)    | 68.8 (3,393)    | 67.8 (4,387)    |
| Duration, median hours (IQR)                            | 51 (18-133)     | 62 (25-143)     | 50 (18-132)     |
| Non-invasive ventilation                                | 13.1 (913)      | 16.2 (798)      | 13.6 (878)      |
| Duration, median hours (IQR)                            | 24 (8-63)       | 28 (9-68)       | 24 (6-65)       |
| ICU length of stay, median days (IQR)                   | 3.7 (1.8-7.7)   | 4.3 (2.4-8.3)   | 3.7 (1.8-7.6)   |
| Hospital length of stay, median days (IQR)              | 13.3 (6.1-29.5) | 13.9 (6.8-30.0) | 13.2 (6.1-29.3) |
| ICU mortality                                           | 14.1 (981)      | 12.2 (601)      | 12.9 (837)      |
| Hospital mortality                                      | 21.0 (1,462)    | 19.9 (979)      | 19.5 (1,260)    |

**Abbreviations:** **AIDS**=autoimmune deficiency syndrome, **APACHE II**=Acute Physiology and Chronic Health Evaluation II, **ICU**=intensive care unit, **IQR**=interquartile range,

**Supplemental Content 4. Flow of patients**

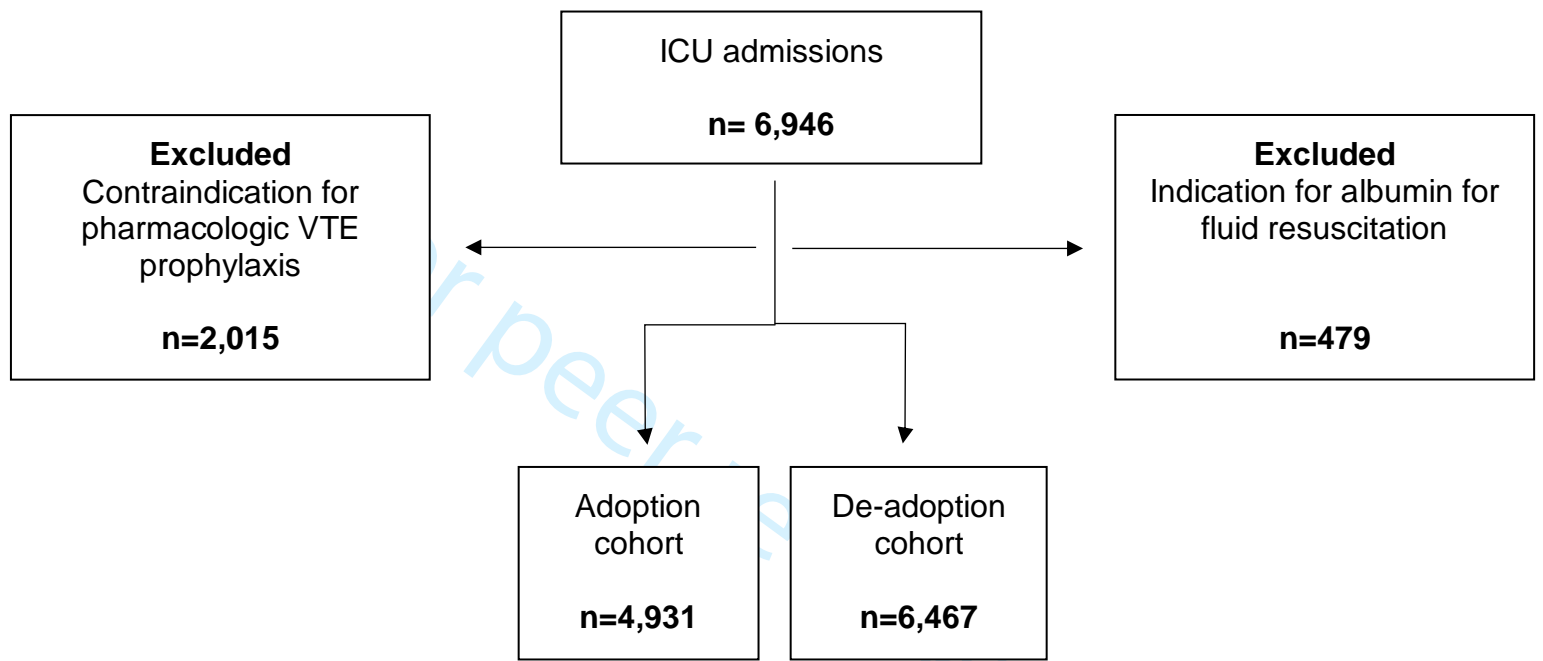

*Footnote:* Adoption cohort = Recommended to receive low molecular weight heparin for venous thromboembolism prophylaxis; de-adoption cohort = Recommended to NOT receive albumin for fluid resuscitation

**Supplemental Content 5. Venous thromboembolism prophylaxis by intensive care unit patient day**

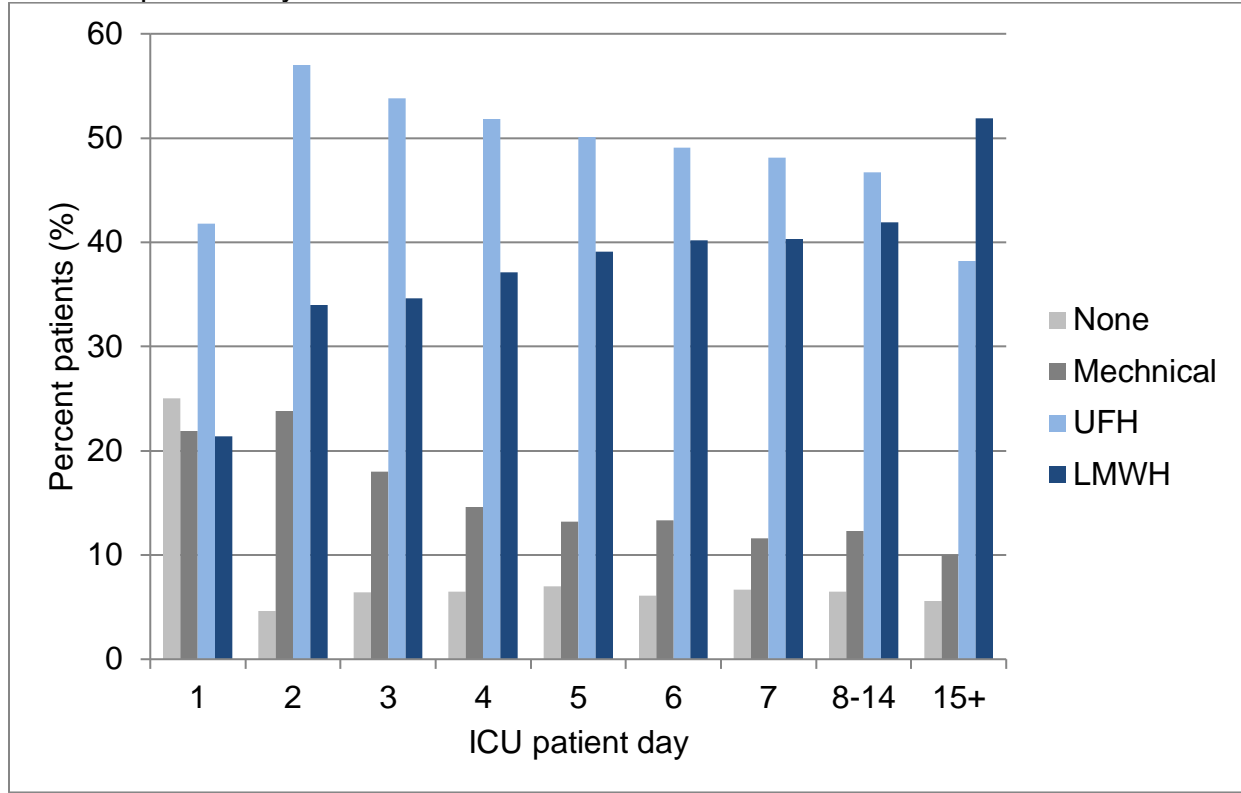

*Footnote:* Percent of patients may add to greater than 100% because patients may have received more than one form of venous thromboembolism prophylaxis on a given patient day.

*Abbreviation:* ICU=intensive care unit, LMWH=low molecular weight heparin, UFH=unfractionated heparin

**Supplemental Content 6.** The use of high value practices (low molecular weight heparin for venous thromboembolism prophylaxis) and the use of low value practices (albumin for fluid resuscitation) by study intensive care unit

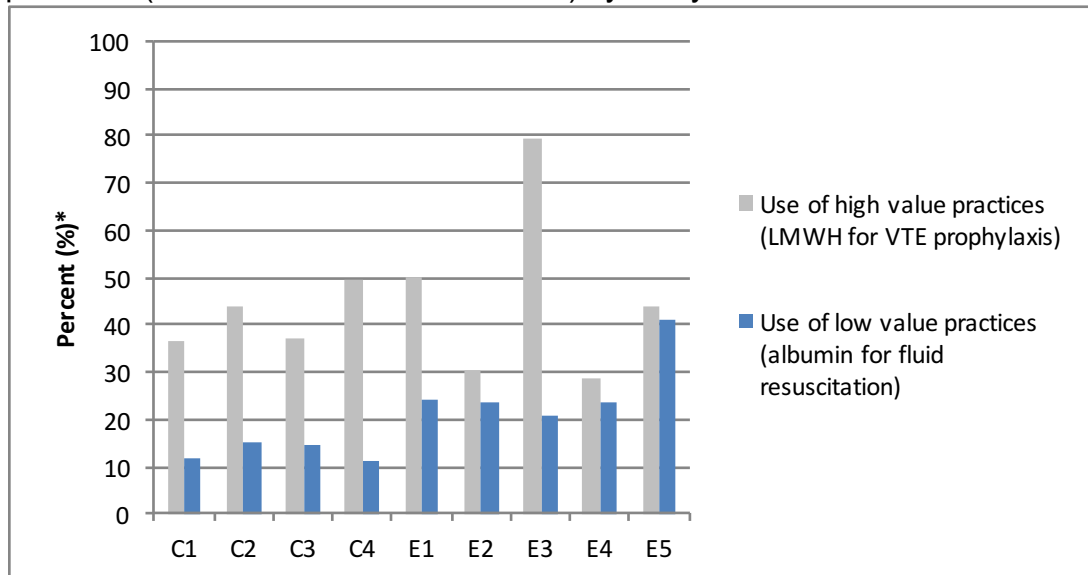

*Footnote:* all "C" sites indicate ICU in Calgary and all "E" sites indicate ICU in Edmonton

\*% of patient-days for VTE prophylaxis and % of patients for albumin

**Supplemental Content 7. Survey participant characteristics**

| <b>Professional group</b>         | <b>% (N)</b>        |
|-----------------------------------|---------------------|
| Attending physician               | 24.7 (64)           |
| Fellow                            | 6.2 (16)            |
| Resident                          | 12.4 (32)           |
| Nurse practitioner                | 5.0 (13)            |
| Nurse manager / charge nurse      | 10.0 (26)           |
| Nurse educator                    | 8.5 (22)            |
| Bedside nurse                     | 23.9 (62)           |
| Pharmacist                        | 9.3 (24)            |
| <b>Years worked in ICU</b>        | <b>Median (IQR)</b> |
| Attending physician               | 14.0 (9.8-22.0)     |
| Clinical fellow                   | 1.8 (1.0-2.3)       |
| Resident                          | 0.3 (0.1-1.0)       |
| Nurse practitioner                | 15.0 (9.0-20.0)     |
| Nurse manager / charge nurse      | 11.5 (7.3-18.8)     |
| Nurse educator                    | 19.0 (10.3-21.5)    |
| Bedside nurse                     | 7.5 (2.5-12.0)      |
| Pharmacist                        | 5.3 (3.0-10.8)      |
| <b>Years worked in healthcare</b> | <b>Median (IQR)</b> |
| Attending physician               | 19.0 (14.8-25.3)    |
| Clinical fellow                   | 8.0 (7.0-9.5)       |
| Resident                          | 3.0 (2.0-5.1)       |
| Nurse practitioner                | 15.0 (12.0-25.0)    |
| Nurse manager / charge nurse      | 16.5 (12.5-24.0)    |
| Nurse educator                    | 21.0 (13.0-26.0)    |
| Bedside nurse                     | 10.0 (6.0-16.0)     |
| Pharmacist                        | 10.5 (6.1-14.3)     |

# BMJ Open

## Barriers and facilitators to adopting high value practices and de-adopting low value practices in Canadian Intensive Care Units: A multi method study

|                                 |                                                                                                                                                                                                                                                                                                                                                                                                                                                                                                               |
|---------------------------------|---------------------------------------------------------------------------------------------------------------------------------------------------------------------------------------------------------------------------------------------------------------------------------------------------------------------------------------------------------------------------------------------------------------------------------------------------------------------------------------------------------------|
| Journal:                        | <i>BMJ Open</i>                                                                                                                                                                                                                                                                                                                                                                                                                                                                                               |
| Manuscript ID                   | bmjopen-2018-024159.R2                                                                                                                                                                                                                                                                                                                                                                                                                                                                                        |
| Article Type:                   | Research                                                                                                                                                                                                                                                                                                                                                                                                                                                                                                      |
| Date Submitted by the Author:   | 08-Jan-2019                                                                                                                                                                                                                                                                                                                                                                                                                                                                                                   |
| Complete List of Authors:       | Sauro, Khara; University of Calgary Cumming School of Medicine, Bagshaw, Sean; University of Alberta, Canada<br>Niven, Daniel; University of Calgary, Critical Care Medicine<br>Soo, Andrea; University of Calgary Cumming School of Medicine<br>Brundin-Mather, Rebecca; University of Calgary Cumming School of Medicine<br>Parsons Leigh, Jeanna; University of Calgary Cumming School of Medicine<br>Cook, Deborah; McMaster University,<br>Stelfox, Henry; University of Calgary, Critical Care Medicine |
| <b>Primary Subject Heading</b>: | Health services research                                                                                                                                                                                                                                                                                                                                                                                                                                                                                      |
| Secondary Subject Heading:      | Intensive care, Evidence based practice                                                                                                                                                                                                                                                                                                                                                                                                                                                                       |
| Keywords:                       | Quality Improvement, Healthcare System, Under-use and Over-use, Appropriateness, Intensive Care                                                                                                                                                                                                                                                                                                                                                                                                               |
|                                 |                                                                                                                                                                                                                                                                                                                                                                                                                                                                                                               |

SCHOLARONE™  
Manuscripts

**Title:** Barriers and facilitators to adopting high value practices and de-adopting low value practices in Canadian Intensive Care Units: A multi method study

**Authors & Affiliations:**

Khara M Sauro PhD,<sup>1,2</sup> Sean M Bagshaw MSc MD,<sup>4</sup> Daniel J Niven MD PhD,<sup>1,2</sup> Andrea Soo PhD,<sup>1</sup> Rebecca Brundin-Mather MSc,<sup>3</sup> Jeanna Parsons Leigh PhD,<sup>1</sup> Deborah J Cook MD,<sup>5</sup> Henry T Stelfox MD PhD<sup>1,2</sup>

<sup>1</sup> Department of Critical Care Medicine, University of Calgary, Calgary AB Canada

<sup>2</sup> Department of Community Health Sciences and O'Brien Institute for Public Health, University of Calgary, Calgary AB Canada

<sup>3</sup> Department of Medicine, University of Calgary, Calgary AB Canada

<sup>4</sup> Department of Critical Care Medicine, Faculty of Medicine & Dentistry, and the School of Public Health, University of Alberta, Edmonton AB Canada

<sup>5</sup>Departments of Medicine and Clinical Epidemiology & Biostatistics, McMaster University, Hamilton ON Canada

**Corresponding Author:**

Dr. H. Thomas Stelfox  
3134 Hospital Drive NW  
Calgary AB  
T2N 5A1  
Canada  
403-944-0072  
[tstelfox@ucalgary.ca](mailto:tstelfox@ucalgary.ca)

**Word Count:** Manuscript=3,368; Abstract=239

**References:** 47

**Figures and tables:** 3 figures, 2 table

## ABSTRACT

**Objective:** To compare and contrast illustrative examples of the adoption of high value practices and the de-adoption of low value practices.

**Design:** 1) Retrospective, population-based audit of low molecular weight heparin (LMWH) for venous thromboembolism (VTE) prophylaxis (high value practice) and albumin for fluid resuscitation (low value practice) and 2) Cross-sectional survey of healthcare providers.

**Setting:** Data were collected from nine adult medical-surgical ICUs in two large Canadian cities. Patients are managed in these ICUs by a group of multi-professional and multi-disciplinary healthcare providers.

**Participants:** Participants included 6946 ICU admissions and 309 healthcare providers from the same ICUs.

**Main Outcome Measures:** 1) The use of LMWH for VTE prophylaxis (percent ICU days) and albumin for fluid resuscitation (percent of patients); and 2) provider knowledge of evidence underpinning these practices, and barriers and facilitators to adopt and de-adopt these practices.

**Results:** LMWH was administered on 38.7% of ICU days, and 20.0% of patients received albumin.



1  
2  
3 Most participants had knowledge of evidence underpinning VTE prophylaxis and fluid  
4 resuscitation (59.1% and 84.2%, respectively). Providers perceived these practices to  
5 be followed. The most commonly reported barrier to adoption was insufficient  
6 knowledge/understanding (32.8%), and to de-adoption was clinical leader preferences  
7 (33.2%). On-site education was the most commonly identified facilitator for adoption  
8 and de-adoption (67.8% and 68.6%, respectively).  
9  
10  
11  
12  
13  
14  
15  
16  
17  
18

19 **Conclusions:** Despite knowledge of and self-reported adherence to best practices,  
20 the audit demonstrated opportunity to improve. Provider-reported barriers and  
21 facilitators to adoption and de-adoption are broadly similar.  
22  
23  
24  
25  
26  
27

28 **KEY WORDS:** Intensive Care; Appropriateness, Under-use and Over-use; Healthcare  
29 System; Quality Improvement  
30  
31  
32  
33

### 34 **STRENGTHS & LIMITATIONS**

- 35  
36 • A strength of this study is the use of mixed-methods to comprehensively  
37 compare adoption of high value practices and de-adoption of low value  
38 practices in the ICU.  
39  
40
- 41  
42 • Another strength is the use of population-based data to capture current clinical  
43 practices.  
44  
45
- 46  
47 • The survey used to assess barriers and facilitators of the two illustrative  
48 practices was derived from a validated survey instrument.  
49  
50  
51  
52  
53  
54  
55  
56  
57  
58  
59  
60

- 1
  - 2
  - 3
  - 4
  - 5
  - 6
  - 7
  - 8
  - 9
  - 10
  - 11
  - 12
  - 13
  - 14
  - 15
  - 16
  - 17
  - 18
  - 19
  - 20
  - 21
  - 22
  - 23
  - 24
  - 25
  - 26
  - 27
  - 28
  - 29
  - 30
  - 31
  - 32
  - 33
  - 34
  - 35
  - 36
  - 37
  - 38
  - 39
  - 40
  - 41
  - 42
  - 43
  - 44
  - 45
  - 46
  - 47
  - 48
  - 49
  - 50
  - 51
  - 52
  - 53
  - 54
  - 55
  - 56
  - 57
  - 58
  - 59
  - 60
- The survey used was simple and designed to garner a representative perspective from all provider professions and therefore captured key concepts, but not granular data.

For peer review only

## INTRODUCTION

Optimizing the quality of care<sup>[1]</sup> is of particular importance in the intensive care unit (ICU) due to the acuity of patient illness and substantial resources required to care for these patients. However, practice change (adopting high value practices or de-adopting low value practices) can lag behind the publication of evidence hindering delivery of evidence-based practices and may be different when adopting or de-adopting practices.<sup>[2, 3]</sup> To minimize the latency for change, it is important to find ways to improve the implementation of evidence-based practices.

A growing body of evidence has evaluated barriers and facilitators for adopting high value practices (effective at improving outcomes).<sup>[4-7]</sup> Substantially less is known about the barriers and facilitators for de-adopting low value practices (ineffective at improving outcomes or harmful), and how they compare to those for adopting high value practices.<sup>[8, 9]</sup> De-adoption, also known by several other terms such as disinvestment and de-implementation,<sup>[8]</sup> is the discontinuation of a practice that has been previously adopted.<sup>[10]</sup> Some have suggested that the adoption of high value practices and de-adoption of low value practices involves similar processes and common facilitators and barriers;<sup>[11, 12]</sup> however, others suggest that the two are clearly distinct.<sup>[9, 13]</sup> There has been limited comparative evaluation of adoption and de-adoption and this is an important knowledge gap given the growing number of initiatives aimed at de-adopting low value practices.<sup>[13-16]</sup>

1  
2  
3 The objective of this study was to describe illustrative example practices of the  
4 adoption of a high value practice (use of low molecular weight heparin [LMWH]  
5 instead of unfractionated heparin [UFH] for venous thromboembolism prophylaxis  
6 [VTE] and the de-adoption of a low value practice (albumin for fluid resuscitation) in  
7 the ICU. The results of this study prompted a subsequent implementation study to  
8 improve these two practices. The audit data identified important opportunities to  
9 improve clinical care, and the perceived barriers and facilitators identified in the  
10 survey were used to inform the development of interventions.  
11  
12  
13  
14  
15  
16  
17  
18  
19  
20  
21  
22  
23

## 24 **METHODS**

### 25 **Study design**

26 This multi-method observational study included: 1) a retrospective cohort study of  
27 patients admitted to ICUs to describe current VTE prophylaxis and fluid resuscitation  
28 practices, and 2) a cross-sectional survey of ICU healthcare providers to examine:  
29 knowledge of evidence underpinning these two practices, and perceived barriers and  
30 facilitators to adopt LMWH for VTE prophylaxis and de-adopt albumin for fluid  
31 resuscitation.  
32  
33  
34  
35  
36  
37  
38  
39  
40  
41  
42  
43

### 44 **Setting**

45 All data were collected from nine adult medical-surgical ICUs in the two largest cities  
46 in a Canadian province (population of 4.1 million). A single health services provider is  
47 responsible for the provision of all hospital-based care in the province and uses a  
48 single formulary across all ICUs (clinical practices may differ between cities and sites).  
49  
50  
51  
52  
53  
54  
55  
56  
57  
58  
59  
60

1  
2  
3 ICU patients are managed by a multi-disciplinary and multi-professional group of  
4  
5 healthcare providers, including (but not limited to): physicians, medical trainees  
6  
7 (clinical fellows and residents), nurse practitioners (NPs with prescribing privileges),  
8  
9 pharmacists, and nurses (managers, educators, bedside).  
10  
11  
12  
13

## 14 **Audit of current practices**

### 15 **Participants**

16  
17  
18  
19 We included patients admitted to nine adult medical-surgical ICUs between January 1,  
20  
21 2014 and December 31, 2014. For analyses, patients were grouped into two cohorts.  
22  
23

24 1) The adoption cohort consisted of patients without a contraindication for  
25  
26 pharmacological VTE prophylaxis where according to international and local  
27  
28 guidelines LMWH should be prescribed.<sup>[17-21]</sup> Contraindications to pharmacological  
29  
30 prophylaxis included a diagnosis potentially associated with a high risk of bleeding  
31  
32 (Supplemental Content 1), daily assessed platelet count  $<50 \times 10^9/L$ , INR  $\geq 2$ , PTT  $\geq 55$   
33  
34 seconds, or receipt of therapeutic anti-coagulation.  
35  
36

37 2) The de-adoption cohort consisted of patients without an indication for use of  
38  
39 albumin for fluid resuscitation and where according to the current evidence-base  
40  
41 albumin should not be used for fluid resuscitation.<sup>[22-25]</sup> Potential indications for  
42  
43 albumin included documented liver disease (cirrhosis or hepatic failure), or receipt of  
44  
45 plasma exchange.<sup>[26-29]</sup> The two study cohorts were drawn from the same patient  
46  
47 population and patients satisfying both sets of clinical indications were included in  
48  
49 both cohorts.  
50  
51  
52  
53  
54  
55  
56  
57  
58  
59  
60

## Data source

All nine ICUs employ a shared integrated, prospective, clinical information system that captures and delivers multimodal patient data (demographic, clinical, outcome) in real time to the bedside (eCritical MetaVision, iMDsoft, MetaVision), and is also a repository and clinical analytics system that stores these data (eCritical TRACER) to support quality improvement and clinical research. eCritical TRACER was used to extract all data.

## Variables

Patient and ICU demographic variables included age, sex, comorbidities, admission type, disease severity (APACHE II score), ICU and hospital length of stay, ICU and hospital mortality. Data abstracted included: 1) type of VTE prophylaxis (mechanical included antiembolic stockings and sequential compression devices, and pharmacological included unfractionated heparin [UFH] and LMWH), 2) ICU day that VTE prophylaxis was administered, 3) if the patient received albumin, 4) quantity (units) of albumin, and 5) ICU day that albumin was administered. An ICU day was defined as any portion of a day between 07:00 and 06:59, recognizing that follow-up time on admission day and discharge day may be less than 24 hours.

## Data analysis

Descriptive statistics (means with standard deviations [SD], medians with interquartile ranges [IQR], frequencies with proportions) were used to describe the two cohorts.

The proportion of admissions and ICU days with LMWH, UFH, and mechanical VTE

1  
2  
3 prophylaxis by ICU and ICU day; and with any albumin administration by ICU and  
4  
5 patient were calculated to describe current clinical practices. The unit of analysis for  
6  
7 our outcome for the adoption cohort (LMWH use) was patient days because VTE  
8  
9 prophylaxis is a routine clinical practice that should be performed on a daily basis.  
10  
11 Conversely, the unit of analysis for our outcome for the de-adoption cohort (albumin  
12  
13 use) was per patient because fluid resuscitation is a sporadic event that is not part of  
14  
15 routine daily patient care.  
16  
17  
18  
19  
20

21  
22 To examine potential associations between patient demographic and sites, and the  
23  
24 use of the high value practice (LMWH) a multivariable generalized estimating  
25  
26 equations (GEEs) logistic regression model with exchangeable correlation structure  
27  
28 given daily measurements (clustering by patient) was used. To examine potential  
29  
30 associations between demographic and site-level factors, and the use of the low value  
31  
32 practice (albumin) a multivariable logistic regression model given a single  
33  
34 measurement per patient was used.  
35  
36  
37  
38  
39

## 40 **Barriers and facilitators to adopting LMWH for VTE prophylaxis and de-adopting** 41 **albumin for fluid resuscitation** 42 43

### 44 Survey development 45

46  
47 The survey was modeled after previous work on adoption of LMWH for VTE  
48  
49 prophylaxis,<sup>[30]</sup> and refined to include questions regarding fluid resuscitation. Because  
50  
51 research around barriers and facilitators of de-adopting low value practices is in its  
52  
53  
54  
55  
56  
57  
58  
59  
60

1  
2  
3 infancy<sup>[31]</sup> the evidence of barriers and facilitators for adopting high value practices  
4  
5 was employed.  
6  
7  
8  
9

10 The survey was divided into four sections: participant demographic information,  
11  
12 knowledge of the current evidence underpinning the best practices, and perceptions  
13  
14 of barriers and facilitators to the use of the two illustrative examples of best practices  
15  
16 (Supplemental Content 2).  
17  
18  
19

20  
21 The survey was pilot tested in two phases: Phase 1) Seven providers completed the  
22  
23 survey and identified unnecessary, missing, or poorly worded items. The survey was  
24  
25 modified and pilot tested with 12 additional ICU providers (1 attending physician, 2  
26  
27 residents, 1 clinical fellow, 1 nurse practitioner, 1 nurse manager/charge nurse, 1  
28  
29 nurse educator, 2 bedside nurses, and 3 pharmacists). Phase 2) Providers completed  
30  
31 the survey twice (7-10 days apart) and an additional brief questionnaire to rate the  
32  
33 clinical sensibility of the survey. Test-retest reliability of the survey demonstrated a  
34  
35 mean intraclass correlation coefficient (ICC) of 0.66 (SD 0.47) for continuous  
36  
37 responses and a mean proportion of agreement of 0.86 (SD 0.10) for categorical  
38  
39 responses. The low ICC for continuous responses is due to low variability in  
40  
41 responses for questions relating to knowledge of best practices. The participants  
42  
43 agreed that the survey had face validity (100%), content validity (92%), clarity (92%),  
44  
45 utility (100%), discriminability (75%), and minimal redundancy (100%).  
46  
47  
48  
49  
50  
51  
52  
53

## 54 Participants

55  
56  
57  
58  
59  
60



1  
2  
3 Healthcare providers (as described in Setting) that cared for patients in the nine ICUs  
4  
5 were invited by email to participate in the study. Invitations to participate were sent to  
6  
7 healthcare providers by the principal investigators or by a local clinical leader and  
8  
9 included a link to the electronic survey (Fluid Survey) or were provided a paper copy if  
10  
11 requested. Weekly reminders were sent for three weeks. Providers that responded to  
12  
13 the survey were offered entry into a draw for one of three \$20 coffee gift cards.  
14  
15  
16  
17  
18

### 19 Data Analysis

20  
21 We used descriptive statistics to describe demographic features of participants,  
22  
23 knowledge of best practices, perceived barriers to adopting high value practices and  
24  
25 de-adopting low value practices, perceived facilitators to encourage adopting high  
26  
27 value practices and de-adopting low value practices. Barriers and facilitators to the  
28  
29 use of best practices were described overall, and by professional group. Professions  
30  
31 were categorized into three groups for analysis: 1) Physicians/NPs (those who  
32  
33 prescribe), 2) Nurses (those who administer), and 3) Pharmacists (those who advise  
34  
35 prescribers). Chi-squared tests were used to test for statistical significance between  
36  
37 groups.  
38  
39  
40  
41  
42  
43  
44

### 45 Patient and public involvement

46  
47 Patient and family representatives were members of a committee that identified and  
48  
49 prioritized research questions for improving the care of critically ill patients.<sup>[32]</sup> LMWH  
50  
51 for VTE prophylaxis and de-adopting albumin for fluid resuscitation were two of the  
52  
53 research questions identified by this committee. Patients were not involved in the  
54  
55  
56  
57  
58  
59  
60

1  
2  
3 design, the recruitment and conduct of this study. The results of this study have been  
4  
5 disseminated to patient and family advisors through oral presentations.  
6  
7  
8  
9

### 10 **Ethical considerations**

11  
12 This study was approved by the University of Calgary Conjoint Health Research  
13  
14 Ethics Board (REB14-0992 and REB15-2147) and the University of Alberta Research  
15  
16 Ethics Board (Pro00056709 and Pro00060650).  
17  
18  
19  
20

## 21 **RESULTS**

### 22 **Audit of current practices**

23  
24  
25  
26 There were 6,946 ICU admissions during the study period, from 6,299 unique  
27  
28 patients. Patient characteristics are presented in Supplemental Content 3.  
29  
30  
31  
32

33 The adoption cohort consisted of 4,931 admissions (71.0% of all admissions) without  
34  
35 a contraindication to pharmacological VTE prophylaxis, and the de-adoption cohort  
36  
37 consisted of 6,467 admissions (93.1%) without a potential indication for albumin  
38  
39 (Supplemental Content 4).  
40  
41  
42  
43

44 During the ICU stay LMWH was given on 38.7% of ICU days, UFH on 45.3% of ICU  
45  
46 days and mechanical prophylaxis (exclusive of pharmacological prophylaxis) on 7.7%  
47  
48 of ICU days. The type of VTE prophylaxis administered varied throughout patients'  
49  
50 ICU stay; administration of mechanical devices and UFH decreased over the course  
51  
52 of the ICU stay while administration of LMWH increased (Supplemental Content 5).  
53  
54  
55  
56  
57  
58  
59  
60

6,804 units of albumin were administered to 20.0% of the 6,467 admissions without documented liver disease or receipt of plasma exchange. Among those receiving at least 1 unit of albumin, the median number of units per patient was 3 (IQR=1.0-6.0). Albumin was administered on 6.5% of ICU days.

When controlling for demographic and site-level factors, the odds of receiving LMWH for VTE prophylaxis and not receiving albumin for fluid resuscitation were significantly lower for those patients with higher severity of illness (APACHE II score). The odds of receiving LMWH for VTE prophylaxis were significantly higher for patients with non-surgical admissions compared to those with elective surgical admissions (odds ratio = 1.34 (95% confidence interval 1.08-1.66); Table 1). There were significant differences in the odds of using LMWH for VTE prophylaxis, and not using albumin for fluid resuscitation across ICUs (Supplemental Content 6), and when controlling for patient-level factors some of these differences persisted especially with regards to the use of LMWH for VTE prophylaxis (Table 1).

**Table 1.** Association between patient demographic and sites, and the use of LMWH for VTE prophylaxis and not using albumin for fluid resuscitation

|                                 | <b>Appropriate VTE prophylaxis OR (95% CI)*</b> | <b>Appropriate fluid resuscitation OR (95% CI)**</b> |
|---------------------------------|-------------------------------------------------|------------------------------------------------------|
| Age                             | NS <sup>†</sup>                                 | 0.999 (0.999-1.00)                                   |
| Female                          | NS <sup>†</sup>                                 | NS <sup>†</sup>                                      |
| Any comorbidity                 | NS <sup>†</sup>                                 | NS <sup>†</sup>                                      |
| Admission type                  |                                                 |                                                      |
| Elective surgery                | 1.00 (reference group)                          | 1.00 (reference group)                               |
| Emergent surgery                | 1.19 (0.92-1.53)                                | 0.92 (0.88-0.95)                                     |
| No surgery                      | 1.34 (1.08-1.66)                                | 1.02 (0.98-1.05)                                     |
| APACHE II Score (ICU admission) | 0.958 (0.951-0.965)                             | 0.989 (0.988-0.990)                                  |

| Site |                        |                        |
|------|------------------------|------------------------|
| C1   | 1.00 (reference group) | 1.00 (reference group) |
| C2   | 1.32 (1.07-1.64)       | 0.96 (0.92-1.00)       |
| C3   | 1.13 (0.89-1.46)       | 0.98 (0.94-1.03)       |
| C4   | 1.48 (1.15-1.90)       | 0.98 (0.93-1.02)       |
| E1   | 2.12 (1.66-2.73)       | 0.90 (0.86-0.95)       |
| E2   | 0.86 (0.71-1.05)       | 0.90 (0.87-0.92)       |
| E3   | 7.26 (5.46-9.65)       | 0.92 (0.87-0.97)       |
| E4   | 0.76 (0.63-0.92)       | 0.88 (0.85-0.91)       |
| E5   | 1.61 (1.23-2.10)       | 0.75 (0.72-0.79)       |

*Footnote:* all “C” sites indicate ICU in Calgary and all “E” sites indicate ICU in Edmonton

\*multivariable generalized estimating equations (GEEs) logistic regression model with exchangeable correlation structure given daily measurements (clustering by patient); “appropriate” considered *use of LMWH*

\*\*standard multivariable logistic regression model given single measurement per patient; “appropriate” considered *not using albumin*

†NS = non-significant, removed from model

## **Barriers and facilitators to adopting LMWH for VTE prophylaxis and de-adopting albumin for fluid resuscitation**

### Participants

83.8% (259 of 309) of participants responded; physicians/NPs (48.3%), nurses (42.5%), and pharmacists (9.3%). Participants worked in healthcare for a median of 13 years (IQR=7.1-20.0) and in critical care for a median of 8 years (IQR=3.0-15.0; Supplemental Content 7).

### Knowledge of evidence

Most participants reported that LMWH was most effective at preventing deep vein thrombosis and pulmonary embolism; and that crystalloids were most effective for fluid resuscitation (Table 2). Perceptions regarding the effectiveness of VTE prophylaxis varied by professional group, as did perceptions regarding the risks of harm (Table 2).

1  
2  
3 Perceptions regarding effectiveness of albumin for fluid resuscitation and risks of  
4 harm associated with each form of fluid resuscitation did not vary by professional  
5 group but perceptions regarding the risk of fluid overload did (Table 2).  
6  
7  
8  
9

10 It was perceived that both best practices were being followed in the ICUs where the  
11 participants practiced (Table 2).  
12  
13  
14  
15  
16  
17  
18  
19  
20  
21  
22  
23  
24  
25  
26  
27  
28  
29  
30  
31  
32  
33  
34  
35  
36  
37  
38  
39  
40  
41  
42  
43  
44  
45  
46  
47  
48  
49  
50  
51  
52  
53  
54  
55  
56  
57  
58  
59  
60

**Table 2.** Knowledge of best practices for VTE prophylaxis and fluid resuscitation

| Survey question                                                                                             | % (N)            |                                     |                             |                                |
|-------------------------------------------------------------------------------------------------------------|------------------|-------------------------------------|-----------------------------|--------------------------------|
|                                                                                                             | Overall<br>N=259 | Physicians/NPs<br>48.3%<br>(N= 125) | Nurses<br>42.5%<br>(N= 110) | Pharmacists<br>9.3%<br>(N= 24) |
| What form(s) of prophylaxis is/are most effective at preventing deep vein thrombosis?*                      |                  |                                     |                             |                                |
| LMWH only                                                                                                   | 59.1 (153)       | 63.2 (79)                           | 51.8 (57)                   | 70.8 (17)                      |
| UFH only                                                                                                    | 4.3 (11)         | 2.4 (3)                             | 7.3 (8)                     | 0.0 (0)                        |
| LMWH & UFH                                                                                                  | 16.2 (42)        | 24.0 (30)                           | 5.5 (6)                     | 25.0 (6)                       |
| Mechanical only                                                                                             | 1.9 (5)          | 0.0 (0)                             | 4.6 (5)                     | 0.0 (0)                        |
| (LMWH or UFH) and Mechanical                                                                                | 15.1 (39)        | 8.0 (10)                            | 25.5 (28)                   | 4.2 (1)                        |
| Unsure only                                                                                                 | 3.5 (9)          | 2.4 (3)                             | 5.5 (6)                     | 0.0 (0)                        |
| What form(s) of prophylaxis is/are most effective at preventing pulmonary embolism? *                       |                  |                                     |                             |                                |
| LMWH only                                                                                                   | 56.8 (147)       | 72.0 (90)                           | 33.6 (37)                   | 83.3 (20)                      |
| UFH only                                                                                                    | 18.2 (47)        | 1.6 (2)                             | 40.9 (45)                   | 0.0 (0)                        |
| LMWH & UFH                                                                                                  | 12.7 (33)        | 20.8 (26)                           | 3.6 (4)                     | 12.5 (3)                       |
| Mechanical only                                                                                             | 0.4 (1)          | 0.0 (0)                             | 0.9 (1)                     | 0.0 (0)                        |
| (LMWH or UFH) & Mechanical                                                                                  | 8.5 (22)         | 3.2 (4)                             | 15.5 (17)                   | 4.2 (1)                        |
| Unsure only                                                                                                 | 3.5 (9)          | 2.4 (3)                             | 5.5 (6)                     | 0.0 (0)                        |
| Which form(s) of prophylaxis is/are most cost effective?*                                                   |                  |                                     |                             |                                |
| LMWH only                                                                                                   | 51.0 (132)       | 70.4 (88)                           | 22.7 (25)                   | 79.2 (19)                      |
| UFH only                                                                                                    | 15.4 (40)        | 12.8 (16)                           | 20.0 (22)                   | 8.3 (2)                        |
| LMWH & UFH                                                                                                  | 4.3 (11)         | 5.6 (7)                             | 0.9 (1)                     | 12.5 (3)                       |
| Mechanical only                                                                                             | 10.0 (26)        | 4.8 (6)                             | 18.2 (20)                   | 0.0 (0)                        |
| (LMWH or UFH) & Mechanical                                                                                  | 2.7 (7)          | 0.0 (0)                             | 6.4 (7)                     | 0.0 (0)                        |
| Unsure only                                                                                                 | 16.6 (43)        | 6.4 (8)                             | 31.8 (35)                   | 0.0 (0)                        |
| Which form(s) of pharmacological prophylaxis has/have the lowest risk of bleeding?†                         |                  |                                     |                             |                                |
| LMWH only                                                                                                   | 57.5 (149)       | 47.2 (59)                           | 69.1 (76)                   | 58.3 (14)                      |
| UFH only                                                                                                    | 24.7 (64)        | 32.8 (41)                           | 18.2 (20)                   | 12.5 (3)                       |
| LMWH & UFH                                                                                                  | 5.0 (13)         | 6.4 (8)                             | 0.0 (0)                     | 20.8 (5)                       |
| Unsure only                                                                                                 | 12.7 (33)        | 13.6 (17)                           | 12.7 (14)                   | 8.3 (2)                        |
| Which form(s) of pharmacological prophylaxis has/have the lowest risk of heparin induced thrombocytopenia?* |                  |                                     |                             |                                |

|                                                                                                                                  |                          |                                              |                                      |                                         |           |
|----------------------------------------------------------------------------------------------------------------------------------|--------------------------|----------------------------------------------|--------------------------------------|-----------------------------------------|-----------|
|                                                                                                                                  | LMWH only                | 86.1 (223)                                   | 94.4 (118)                           | 74.6 (82)                               | 95.8 (23) |
|                                                                                                                                  | UFH only                 | 6.6 (17)                                     | 3.2 (4)                              | 11.8 (13)                               | 0.0 (0)   |
|                                                                                                                                  | LMWH & UFH               | 0.4 (1)                                      | 0.0 (0)                              | 0.0 (0)                                 | 4.2 (1)   |
|                                                                                                                                  | Unsure only              | 7.0 (18)                                     | 2.4 (3)                              | 13.6 (15)                               | 0.0 (0)   |
| To what extent do you think best practices are followed for preventing DVT/PE in your ICU?<br>0=never and 7=always, Median (IQR) |                          |                                              |                                      |                                         |           |
|                                                                                                                                  |                          | 6 (5-6)                                      | 6 (5-6)                              | 6 (6-7)                                 | 6 (5-6)   |
|                                                                                                                                  |                          |                                              |                                      |                                         |           |
| <b>Survey question</b>                                                                                                           | <b>Overall<br/>N=259</b> | <b>Physicians/NPs<br/>48.3%<br/>(N= 125)</b> | <b>Nurses<br/>42.5%<br/>(N= 110)</b> | <b>Pharmacists<br/>9.3%<br/>(N= 24)</b> |           |
| What form(s) of IV fluids is/are most effective for fluid resuscitation? ‡                                                       |                          |                                              |                                      |                                         |           |
|                                                                                                                                  | Albumin only             | 3.5 (9)                                      | 2.4 (3)                              | 5.5 (6)                                 | 0.0 (0)   |
|                                                                                                                                  | Crystalloids only        | 84.2 (218)                                   | 83.2 (104)                           | 82.7 (91)                               | 95.8 (23) |
|                                                                                                                                  | Albumin & Crystalloids   | 8.5 (22)                                     | 9.6 (12)                             | 9.1 (10)                                | 0.0 (0)   |
|                                                                                                                                  | Unsure only              | 3.9 (10)                                     | 4.8 (6)                              | 2.7 (3)                                 | 4.2 (1)   |
| Which form(s) of IV resuscitation fluids are most cost effective? ‡                                                              |                          |                                              |                                      |                                         |           |
|                                                                                                                                  | Albumin only             | 0.4 (1)                                      | 0.0 (0)                              | 0.9 (1)                                 | 0.0 (0)   |
|                                                                                                                                  | Crystalloids only        | 94.6 (245)                                   | 94.4 (118)                           | 95.5 (105)                              | 91.7 (22) |
|                                                                                                                                  | Albumin & Crystalloids   | 0.4 (1)                                      | 0.8 (1)                              | 0.0 (0)                                 | 0.0 (0)   |
|                                                                                                                                  | Unsure only              | 4.6 (12)                                     | 4.8 (6)                              | 3.6 (4)                                 | 8.3 (2)   |
| Which form(s) of IV resuscitation fluids has the lowest risk of fluid overload? *                                                |                          |                                              |                                      |                                         |           |
|                                                                                                                                  | Albumin only             | 47.1 (122)                                   | 32.8 (41)                            | 69.1 (76)                               | 20.8 (5)  |
|                                                                                                                                  | Crystalloids only        | 29.7 (77)                                    | 36.8 (46)                            | 23.6 (26)                               | 20.8 (5)  |
|                                                                                                                                  | Albumin & Crystalloids   | 1.9 (5)                                      | 3.2 (4)                              | 0.0 (0)                                 | 4.2 (1)   |
|                                                                                                                                  | Unsure only              | 21.2 (55)                                    | 27.2 (34)                            | 7.3 (8)                                 | 54.2 (13) |
| Which form(s) of IV resuscitation fluids has the lowest risk of infectious disease? ‡                                            |                          |                                              |                                      |                                         |           |
|                                                                                                                                  | Albumin only             | 2.7 (7)                                      | 1.6 (2)                              | 4.6 (5)                                 | 0.0 (0)   |
|                                                                                                                                  | Crystalloids only        | 86.5 (224)                                   | 87.2 (109)                           | 87.3 (96)                               | 79.2 (19) |
|                                                                                                                                  | Albumin & Crystalloids   | 0.8 (2)                                      | 0.8 (1)                              | 0.9 (1)                                 | 0.0 (0)   |
|                                                                                                                                  | Unsure only              | 10.0 (26)                                    | 10.4 (13)                            | 7.3 (8)                                 | 20.8 (5)  |

To what extent do you think best practices are followed for prescribing fluid boluses in your ICU?

0=never and 7=always; Median (IQR)

|  |         |         |         |         |
|--|---------|---------|---------|---------|
|  | 6 (5-6) | 5 (5-6) | 6 (5-6) | 5 (5-6) |
|--|---------|---------|---------|---------|

<sup>1</sup>The order of the survey items are as presented in this table.

<sup>2</sup>Evidence suggests the efficacy of LMWH for deep vein thrombosis is similar to or better than UFH.<sup>[18, 19, 33, 34]</sup> Evidence suggests that LMWH is more efficacious than UFH for preventing pulmonary embolism, has a lower incidence of heparin induced thrombocytopenia, and a similar or lower risk of bleeding.<sup>[18, 19, 33, 34]</sup>

<sup>3</sup>Evidence suggests that LMWH is more cost effective than UFH.<sup>18</sup>

<sup>4</sup>Evidence suggests that albumin and crystalloids are similarly effective for fluid resuscitation.<sup>21, 24, 25, 26</sup> Evidence suggests that albumin has a higher risk of infectious disease transmission than crystalloids and is less cost-effective than crystalloids.

**Abbreviations:** **IQR** = interquartile range (p25 - p75), **LMWH** = low molecular weight heparin, **N** = number, **NP** = nurse practitioner, **UFH** = unfractionated heparin, \* = responses varied by professional group (p<0.001), † = responses varied by professional group (p=0.01), ‡ = responses did not vary by professional group (p>0.05)



1  
2  
3  
4  
5 Barriers to adopting LMWH for VTE prophylaxis and de-adopting albumin for fluid  
6 resuscitation  
7

8  
9  
10 Barriers to adoption and de-adoption were reported by 65.2% and 64.9% of  
11 respondents, respectively. The most commonly reported perceived barriers to  
12 adopting LMWH for VTE prophylaxis were insufficient knowledge or understanding,  
13 ICU culture, and no clinical guidelines (Figure 1). The most commonly reported  
14 barriers to de-adopting albumin for fluid resuscitation were a strong clinical preference  
15 of the local clinical leaders in the ICUs, ICU culture, and insufficient knowledge or  
16 understanding (Figure 1). Reported barriers differed between professional groups for  
17 both adoption (Figure 2a) and de-adoption (Figure 2b).  
18  
19  
20  
21  
22  
23  
24  
25  
26  
27  
28  
29

30  
31 Facilitators to adopting LMWH for VTE prophylaxis and de-adopting albumin for fluid  
32 resuscitation  
33

34  
35 On site education and pre-set orders were perceived to be the most commonly  
36 reported facilitator of both adoption and de-adoption (Figure 3). Verbal reminders  
37 from pharmacists to physicians was commonly reported as a perceived facilitator for  
38 adopting LMMH for VTE prophylaxis. A local leader championing the practice was  
39 commonly reported as a perceived facilitator for de-adopting albumin for fluid  
40 resuscitation (Figure 3). There was no variability by professional group.  
41  
42  
43  
44  
45  
46  
47  
48  
49  
50

## 51 **DISCUSSION**

52  
53  
54  
55  
56  
57  
58  
59  
60

1  
2  
3 The present study identified opportunities to improve the use of best practices for VTE  
4 prophylaxis (adopting the high value practice of LMWH) and fluid resuscitation (de-  
5  
6 adopting the low value practice of albumin). Our audit data demonstrated that current  
7  
8 practice does not reflect providers' understanding of the evidence for these practices.  
9  
10  
11 The use of the best practice for these two illustrative examples were less likely for  
12  
13 patients with greater severity of illness and varied across institutions. The perceived  
14  
15 barriers and facilitators to adoption and de-adoption were broadly similar.  
16  
17  
18  
19  
20

21  
22 Are de-adoption and adoption just the flip-side of the same coin? There is substantial  
23  
24 literature describing the adoption of high value practices, but much less is known  
25  
26 about de-adoption of low value practices.<sup>[8]</sup> Science can inform clinical practice  
27  
28 through discovery resulting in adoption of a new practice, replacement resulting in a  
29  
30 practice update, and reversal resulting in de-adoption of an existing practice. It is only  
31  
32 recently that the last concept, de-adopting low value practices, has been debated in  
33  
34 journals and by professional societies.<sup>[13, 14, 16]</sup> The practical implication is that there is  
35  
36 limited evidence to inform whether the barriers and facilitators for adoption and de-  
37  
38 adoption are similar or sufficiently distinct to warrant different approaches.<sup>[9, 11-13]</sup> Our  
39  
40 study adds to the limited evidence base by suggesting that culture or organizational  
41  
42 factors, provider characteristics, and patient characteristics are perceived to be  
43  
44 important barriers and facilitators that may play broadly similar roles in adoption and  
45  
46 de-adoption.<sup>[11, 12]</sup>  
47  
48  
49  
50  
51  
52  
53  
54  
55  
56  
57  
58  
59  
60

1  
2  
3 Knowledge translation (KT) interventions are strategies to improve the synthesis,  
4 dissemination, exchange, and application of evidence to improve health.<sup>[5]</sup> KT  
5  
6 interventions tailored to the specific barriers and facilitators of an innovation and the  
7  
8 local context are more likely to effect change.<sup>[5, 6]</sup> Our study provides insight into the  
9  
10 perceived barriers and facilitators of adopting high value practices (LMWH for VTE  
11  
12 prophylaxis) and de-adopting low value practices (albumin for fluid resuscitation)  
13  
14 within ICUs, which should be taken into consideration when designing KT  
15  
16 interventions. Interestingly, despite knowledge of the evidence underlying the  
17  
18 illustrative example practices, providers perceived insufficient knowledge or  
19  
20 understanding to be a barrier and perceived education to be a facilitator to both  
21  
22 adopting high value practices and de-adopting low value practices. These barriers and  
23  
24 facilitators are consistent with a systematic review that suggests the most effective KT  
25  
26 interventions in the ICU employ a combination of education and protocols.<sup>[35]</sup> While  
27  
28 consistent with previous KT studies, this finding is paradoxical. It is possible that while  
29  
30 knowledgeable, providers' confidence in applying their knowledge clinically was low  
31  
32 and they believed education to be the intervention needed to improve their confidence  
33  
34 in applying their knowledge. Furthermore, confidence in applying new evidence in  
35  
36 clinical practice may be particularly challenging in the care of severely ill patients.  
37  
38 This hypothesis is supported by two of our findings: 1) the use of LMWH for VTE  
39  
40 prophylaxis and not using albumin for fluid resuscitation was inversely associated with  
41  
42 severity of patient illness and 2) the use of LMWH and not using albumin increased as  
43  
44 the patient became more stable (over ICU stay). Potential hypotheses to explain these  
45  
46 observations include that clinicians may employ conservative decision-making (use  
47  
48  
49  
50  
51  
52  
53  
54  
55  
56  
57  
58  
59  
60

1  
2  
3 more familiar practices) or unintentionally neglect to use best practices when caring for  
4  
5 sicker patients, but this need further exploration. The implications are that KT  
6  
7 interventions should consider clinician heuristics that are likely to be influenced by the  
8  
9 nature and severity of patient illness.  
10  
11  
12  
13

14  
15 Our study suggests that factors other than knowledge may contribute to the  
16  
17 successful adoption of high value practices and de-adoption of low value practices,  
18  
19 which includes culture, providers, and the innovation. These factors have previously  
20  
21 been identified within the context of the ICU.<sup>[2, 36-41]</sup> ICU culture and local clinical  
22  
23 leader preferences were among the most commonly endorsed barriers to adopting  
24  
25 high value practices and de-adopting low value practices in this study and in our  
26  
27 study. This is highlighted by the variation in the use of LMWH between ICUs, even  
28  
29 when patient level factors were taken into consideration. Interestingly, this finding was  
30  
31 less pronounced for de-adoption, which has been previously reported.<sup>[9]</sup> Culture, also  
32  
33 referred to as organizational context, is a frequently cited barrier to evidence-based  
34  
35 medicine and can have a profound effect on clinical practice.<sup>[7, 42]</sup> However, few  
36  
37 studies have systematically evaluated the effect of culture on adopting high value  
38  
39 practices and de-adopting low value practices, and implementation studies  
40  
41 infrequently account for the effect of culture on their practice change interventions.<sup>[43]</sup>  
42  
43 Similarly, the professional role of the provider is not often contextualized but may be  
44  
45 important (e.g., should pharmacists and nurses be targeted in KT interventions  
46  
47 designed to change the prescribing patterns of physicians and if so how?).<sup>[44]</sup> This  
48  
49  
50  
51  
52  
53  
54  
55  
56  
57  
58  
59  
60

1  
2  
3 may be especially relevant as healthcare delivery becomes increasingly multi-  
4 professional and team-based as illustrated in our setting (ICU).  
5  
6  
7  
8  
9

10 The characteristics of innovations themselves may influence change in clinical  
11 practice. Evidence suggests that if the innovation being adopted is congruent with  
12 clinical practice beliefs it can facilitate adoption.<sup>[7]</sup> Furthermore, the quality, quantity,  
13 and stability of available evidence to support the adoption or de-adoption of an  
14 innovation is likely important.<sup>[45]</sup> Although most providers in our study were aware of  
15 the evidence to support the adoption of LMWH for VTE prophylaxis and de-adoption  
16 of albumin for fluid resuscitation, they may not have perceived the evidence to be  
17 sufficient to warrant practice change. A growing awareness of challenges with  
18 reproducing scientific evidence and clinician experience with practice reversals<sup>[2]</sup> may  
19 result in more conservative provider behavior and slower practice change in response  
20 to new evidence. The suboptimal prescribing practices observed in our study likely  
21 represent a combination of all these factors.  
22  
23  
24  
25  
26  
27  
28  
29  
30  
31  
32  
33  
34  
35  
36  
37  
38  
39

40 One limitation of this study is that the survey used was imperfect. The results of the  
41 self-reported survey reflect perceived modifiers of practice among providers rather  
42 than factors shown to influence practice patterns as identified in observational  
43 studies.<sup>[46]</sup> The survey was purposefully designed to be simple and accessible to  
44 garner a representative perspective from all provider professions and therefore  
45 captured key concepts, but not granular data. Nevertheless, the survey has been  
46 successfully used for a similar purpose by others;<sup>[30]</sup> was reliable and reported to have  
47  
48  
49  
50  
51  
52  
53  
54  
55  
56  
57  
58  
59  
60

1  
2  
3 good clinical sensibility. Alternative methodologies such as qualitative analyses of  
4 semi-structured interviews may have allowed for more in depth exploration of barriers  
5 and facilitators to adopting LMWH and de-adopting albumin. Finally, while this study  
6 was a provincial and multi-site it was constrained to ICUs, which should be taken into  
7 consideration when interpreting our findings beyond this setting.  
8  
9  
10  
11  
12  
13  
14  
15  
16

17 In conclusion, our study provides several insights into similarities and differences  
18 between adoption of high value practices and de-adoption of low value practices. Both  
19 adoption and de-adoption of the illustrative example practices did not reflect  
20 healthcare providers' knowledge of the evidence. The use of best practices for both  
21 illustrative examples practices were less likely for patients with greater severity of  
22 illness and varied across institutions. We found that perceived barriers and facilitators  
23 are more similar than different between adoption and de-adoption, which suggests  
24 existing behavior change frameworks for adopting high value practices may also be  
25 applicable for de-adopting low value practices.  
26  
27  
28  
29  
30  
31  
32  
33  
34  
35  
36  
37  
38

### 39 **ACKNOWLEDGEMENTS**

40  
41  
42 KMS would like to acknowledge salary support from the O'Brien Institute for Public  
43 Health & Ward of the 21<sup>st</sup> Century within the Cumming School of Medicine at the  
44 University of Calgary, and the Canadian Institutes of Health Research. SB is  
45 supported by a Canada Research Chair in Critical Care Nephrology. DJC holds a  
46 Canada Research Chair in Knowledge Translation in the ICU. HTS is supported by a  
47 Population Health Investigator Award from Alberta Innovates and an Embedded  
48 Clinician Researcher Award from the Canadian Institutes of Health Research.  
49  
50  
51  
52  
53  
54  
55  
56  
57  
58  
59  
60

## FUNDING

This work was supported by a Partnership for Research and Innovation in Health Systems grant awarded by Alberta Innovates (Grant #201309 [HTS and SMB]).

## DISCLOSURE OF CONFLICT OF INTERESTS

The authors declare that they have no competing interests.

## DATA SHARING STATEMENT

Data will be provided upon request to the corresponding author ([tstelfox@ucalgary.ca](mailto:tstelfox@ucalgary.ca))

## AUTHORS' CONTRIBUTIONS

Dr. Sauro contributed to the design and conceptualization of the study; analysis and interpretation of the data, drafting and revising the manuscript and gave approval of the final version of the manuscript. No conflicts of interest to declare.

Dr. Bagshaw contributed to the design and conceptualization of the study, interpretation of the data, providing feedback on the manuscript, and gave approval of the final version of the manuscript. No conflicts of interest to declare.

Dr. Niven contributed to the design and conceptualization of the study, interpretation of the data, providing feedback on the manuscript, and gave approval of the final version of the manuscript. No conflicts of interest to declare.

1  
2  
3 Dr. Soo contributed to the analysis and interpretation of the data, providing feedback  
4  
5 on the manuscript and gave approval of the final version of the manuscript. No  
6  
7 conflicts of interest to declare.  
8  
9

10  
11  
12 Ms. Brundin-Mather contributed to the interpretation of the data, providing feedback  
13  
14 on the manuscript, and gave approval of the final version of the manuscript. No  
15  
16 conflicts of interest to declare.  
17  
18

19  
20  
21 Dr. Parsons Leigh contributed to the design and conceptualization of the study,  
22  
23 interpretation of the data, providing feedback on the manuscript, and gave approval of  
24  
25 the final version of the manuscript. No conflicts of interest to declare.  
26  
27

28  
29  
30 Dr. Cook contributed to the design and conceptualization of the study, interpretation of  
31  
32 the data, providing feedback on the manuscript, and gave approval of the final version  
33  
34 of the manuscript. No conflicts of interest to declare.  
35  
36

37  
38  
39 Dr. Stelfox contributed to the design and conceptualization of the study, interpretation  
40  
41 of the data, providing feedback on the manuscript, and gave approval of the final  
42  
43 version of the manuscript. No conflicts of interest to declare.  
44  
45  
46  
47  
48  
49  
50  
51  
52  
53  
54  
55  
56  
57  
58  
59  
60



## References

1. Institute of Medicine. Crossing the Quality Chiasm. Washington, DC; 2001.
2. Niven DJ, Rubenfeld GD, Kramer AA, et al. Effect of published scientific evidence on glycemic control in adult intensive care units. *JAMA internal medicine*. 2015;175(5):801-9.
3. McGlynn EA, Asch SM, Adams J, et al. The quality of health care delivered to adults in the United States. *The New England journal of medicine*. 2003;348(26):2635-45.
4. Rogers EM. Lessons for guidelines from the diffusion of innovations. *Jt Comm J Qual Improv*. 1995;21(7):324-8.
5. Graham ID, Logan J, Harrison MB, et al. Lost in knowledge translation: time for a map? *The Journal of continuing education in the health professions*. 2006;26(1):13-24.
6. McCormack B, Kitson A, Harvey G, et al. Getting evidence into practice: the meaning of 'context'. *J Adv Nurs*. 2002;38(1):94-104.
7. Cabana MD, Rand CS, Powe NR, et al. Why don't physicians follow clinical practice guidelines? A framework for improvement. *JAMA : the journal of the American Medical Association*. 1999;282(15):1458-65.
8. Niven DJ, Mrklas KJ, Holodinsky JK, et al. Towards understanding the de-adoption of low-value clinical practices: a scoping review. *BMC medicine*. 2015;13:255.
9. van Bodegom-Vos L, Davidoff F, Marang-van de Mheen PJ. Implementation and de-implementation: two sides of the same coin? *BMJ quality & safety*. 2017;26(6):495-501.
10. Rogers EM. The innovation-decision process. *Diffusion of Innovations*. 5 ed. New York, NY: Free Press; 2003.
11. Prasad V, Ioannidis JP. Evidence-based de-implementation for contradicted, unproven, and aspiring healthcare practices. *Implementation science : IS*. 2014;9:1.
12. Montini T, Graham ID. "Entrenched practices and other biases": unpacking the historical, economic, professional, and social resistance to de-implementation. *Implementation science : IS*. 2015;10:24.
13. Davidoff F. On the undiffusion of established practices. *JAMA internal medicine*. 2015;175(5):809-11.
14. Al-Ani F, Shariff S, Siqueira L, et al. Identifying venous thromboembolism and major bleeding in emergency room discharges using administrative data. *Thrombosis research*. 2015;136(6):1195-8.
15. Macleod MR, Michie S, Roberts I, et al. Biomedical research: increasing value, reducing waste. *Lancet (London, England)*. 2014;383(9912):101-4.
16. Grady D, Redberg RF. Less is more: how less health care can result in better health. *Archives of internal medicine*. 2010;170(9):749-50.
17. Fowler RA, Mittmann N, Geerts W, et al. Cost-effectiveness of dalteparin vs unfractionated heparin for the prevention of venous thromboembolism in critically ill patients. *JAMA : the journal of the American Medical Association*. 2014;312(20):2135-45.

18. Hirsh J, Raschke R. Heparin and low-molecular-weight heparin: the Seventh ACCP Conference on Antithrombotic and Thrombolytic Therapy. *Chest*. 2004;126(3 Suppl):188s-203s.
19. Li G, Cook DJ, Levine MA, et al. Competing Risk Analysis for Evaluation of Dalteparin Versus Unfractionated Heparin for Venous Thromboembolism in Medical-Surgical Critically Ill Patients. *Medicine*. 2015;94(36):e1479.
20. Venous thromboembolism prophylaxis, (2016).
21. Rhodes A, Evans LE, Alhazzani W, et al. Surviving Sepsis Campaign: International Guidelines for Management of Sepsis and Septic Shock: 2016. *Critical Care Medicine*. 2017;45(3):486-552.
22. Finfer S, Bellomo R, Boyce N, et al. A comparison of albumin and saline for fluid resuscitation in the intensive care unit. *The New England journal of medicine*. 2004;350(22):2247-56.
23. Lyu PF, Hockenberry JM, Gaydos LM, et al. Impact of a Sequential Intervention on Albumin Utilization in Critical Care. *Crit Care Med*. 2016;44(7):1307-13.
24. Navickis RJ, Greenhalgh DG, Wilkes MM. Albumin in Burn Shock Resuscitation: A Meta-Analysis of Controlled Clinical Studies. *Journal of burn care & research : official publication of the American Burn Association*. 2016;37(3):e268-78.
25. Patel A, Laffan MA, Waheed U, et al. Randomised trials of human albumin for adults with sepsis: systematic review and meta-analysis with trial sequential analysis of all-cause mortality. *BMJ (Clinical research ed)*. 2014;349:g4561.
26. EASL clinical practice guidelines on the management of ascites, spontaneous bacterial peritonitis, and hepatorenal syndrome in cirrhosis. *Journal of hepatology*. 2010;53(3):397-417.
27. Bernardi M, Caraceni P, Navickis RJ, et al. Albumin infusion in patients undergoing large-volume paracentesis: a meta-analysis of randomized trials. *Hepatology (Baltimore, Md)*. 2012;55(4):1172-81.
28. Cavallin M, Kamath PS, Merli M, et al. Terlipressin plus albumin versus midodrine and octreotide plus albumin in the treatment of hepatorenal syndrome: A randomized trial. *Hepatology (Baltimore, Md)*. 2015;62(2):567-74.
29. Salerno F, Navickis RJ, Wilkes MM. Albumin infusion improves outcomes of patients with spontaneous bacterial peritonitis: a meta-analysis of randomized trials. *Clinical gastroenterology and hepatology : the official clinical practice journal of the American Gastroenterological Association*. 2013;11(2):123-30.e1.
30. Cook D, Duffett M, Lauzier F, et al. Barriers and facilitators of thromboprophylaxis for medical-surgical intensive care unit patients: a multicenter survey. *Journal of critical care*. 2014;29(3):471.e1-9.
31. Parsons Leigh J, Niven DJ, Boyd JM, et al. Developing a framework to guide the de-adoption of low-value clinical practices in acute care medicine: a study protocol. *BMC health services research*. 2017;17(1):54.
32. Stelfox HT, Niven DJ, Clement FM, et al. Stakeholder Engagement to Identify Priorities for Improving the Quality and Value of Critical Care. *PloS one*. 2015;10(10):e0140141.
33. PROTECT investigators. Dalteparin versus Unfractionated Heparin in Critically Ill Patients. *New England Journal of Medicine*. 2011;364(14):1305-14.

- 1
- 2
- 3 34. Alhazzani W, Lim W, Jaeschke RZ, et al. Heparin thromboprophylaxis in
- 4 medical-surgical critically ill patients: a systematic review and meta-analysis of
- 5 randomized trials. *Crit Care Med*. 2013;41(9):2088-98.
- 6
- 7 35. Sinuff T, Muscedere J, Adhikari NK, et al. Knowledge translation interventions
- 8 for critically ill patients: a systematic review\*. *Crit Care Med*. 2013;41(11):2627-40.
- 9
- 10 36. Gershengorn HB, Wunsch H. Understanding changes in established practice:
- 11 pulmonary artery catheter use in critically ill patients. *Crit Care Med*.
- 12 2013;41(12):2667-76.
- 13
- 14 37. Koo KK, Sun JC, Zhou Q, et al. Pulmonary artery catheters: evolving rates and
- 15 reasons for use. *Crit Care Med*. 2011;39(7):1613-8.
- 16
- 17 38. Murphy DJ, Needham DM, Netzer G, et al. RBC transfusion practices among
- 18 critically ill patients: has evidence changed practice? *Crit Care Med*.
- 19 2013;41(10):2344-53.
- 20
- 21 39. Wiener RS, Welch HG. Trends in the use of the pulmonary artery catheter in
- 22 the United States, 1993-2004. *JAMA : the journal of the American Medical*
- 23 *Association*. 2007;298(4):423-9.
- 24
- 25 40. Munshi L, Gershengorn HB, Fan E, et al. Adjuvants to Mechanical Ventilation
- 26 for Acute Respiratory Failure. Adoption, De-adoption, and Factors Associated with
- 27 Selection. *Annals of the American Thoracic Society*. 2017;14(1):94-102.
- 28
- 29 41. Kahn JM, Le TQ. Adoption and de-adoption of drotrecogin alfa for severe
- 30 sepsis in the United States. *Journal of critical care*. 2016;32:114-9.
- 31
- 32 42. Melnyk BM. Culture Eats Strategy Every Time: What Works in Building and
- 33 Sustaining an Evidence-Based Practice Culture in Healthcare Systems. *Worldviews*
- 34 *on evidence-based nursing*. 2016;13(2):99-101.
- 35
- 36 43. Dodek P, Cahill NE, Heyland DK. The relationship between organizational
- 37 culture and implementation of clinical practice guidelines: a narrative review. *JPEN*
- 38 *Journal of parenteral and enteral nutrition*. 2010;34(6):669-74.
- 39
- 40 44. Menear M, Grindrod K, Clouston K, et al. Advancing knowledge translation in
- 41 primary care. *Can Fam Physician*. 2012;58(6):623-7, e302-7.
- 42
- 43 45. Scott IA, Elshaug AG. Foregoing low-value care: how much evidence is
- 44 needed to change beliefs? *Internal medicine journal*. 2013;43(2):107-9.
- 45
- 46 46. Lauzier F, Muscedere J, Deland E, et al. Thromboprophylaxis patterns and
- 47 determinants in critically ill patients: a multicenter audit. *Critical care (London,*
- 48 *England)*. 2014;18(2):R82.
- 49
- 50
- 51
- 52
- 53
- 54
- 55
- 56
- 57
- 58
- 59
- 60

1  
2  
3  
4 **Figure 1.** Barriers to the adoption of high value practices (low molecular weight  
5 heparin for venous thromboembolism prophylaxis) and de-adoption of low value  
6 practices (albumin for fluid resuscitation)  
7  
8  
9

10  
11  
12  
13 *Abbreviations:* ICU: intensive care unit  
14  
15

16  
17  
18  
19  
20  
21  
22  
23  
24  
25  
26  
27  
28  
29  
30  
31  
32  
33  
34  
35  
36  
37  
38  
39  
40  
41  
42  
43  
44  
45  
46  
47  
48  
49  
50  
51  
52  
53  
54  
55  
56  
57  
58  
59  
60

For peer review only

1  
2  
3  
4 **Figure 2a.** Barriers to the adoption of high value practices (low molecular weight  
5 heparin for venous thromboembolism prophylaxis) by professional group.  
6  
7

8  
9  
10 **Figure 2b.** Barriers to the de-adoption of low value practices (albumin for fluid  
11 resuscitation) by professional group  
12  
13

14  
15  
16 *Abbreviations:* **ICU**=intensive care unit, **NP**=nurse practitioner  
17  
18  
19  
20  
21  
22  
23  
24  
25  
26  
27  
28  
29  
30  
31  
32  
33  
34  
35  
36  
37  
38  
39  
40  
41  
42  
43  
44  
45  
46  
47  
48  
49  
50  
51  
52  
53  
54  
55  
56  
57  
58  
59  
60

1  
2  
3  
4 **Figure 3.** Facilitators to the adoption of high value practices (low molecular  
5 weight heparin for venous thromboembolism prophylaxis) and de-adoption of low  
6 value practices (albumin for fluid resuscitation)  
7  
8  
9  
10  
11  
12  
13  
14  
15

16 *Abbreviation:* **MD**=medical doctor, **QI**=quality improvement  
17  
18  
19  
20  
21  
22  
23  
24  
25  
26  
27  
28  
29  
30  
31  
32  
33  
34  
35  
36  
37  
38  
39  
40  
41  
42  
43  
44  
45  
46  
47  
48  
49  
50  
51  
52  
53  
54  
55  
56  
57  
58  
59  
60

1  
2  
3  
4  
5  
6  
7  
8  
9  
10  
11  
12  
13  
14  
15  
16  
17  
18  
19  
20  
21  
22  
23  
24  
25  
26  
27  
28  
29  
30  
31  
32  
33  
34  
35  
36  
37  
38  
39  
40  
41  
42  
43  
44  
45  
46  
47

**Figure 1.** Barriers to the adoption of high value practices (low molecular weight heparin for venous thromboembolism prophylaxis) and de-adoption of low value practices (albumin for fluid resuscitation)



**Figure 2.** Barriers to adopting high value practices and de-adopting low value practices by profession

2.a) Barriers to adopting high value practices (LMWH for VTE prophylaxis) by professional group



2.b) Barriers to de-adopting low value practices (albumin for fluid resuscitation) by professional group



Abbreviations: ICU=intensive care unit; NP=nurse practitioner; LMWH=low molecular weight heparin; VTE=venous thromboembolism



**Figure 3.** Facilitators to the adoption of high value practices (low molecular weight heparin for venous thromboembolism prophylaxis) and de-adoption of low value practices (albumin for fluid resuscitation)



Abbreviation: MD=medical doctor, QI=quality improvement

**Supplemental Content 1.** List of diagnoses with a potential contraindication to receive pharmacological venous thromboembolism prophylaxis or indication for therapeutic anticoagulation\*

|                                                            |
|------------------------------------------------------------|
| Arteriovenous malformation, surgery for                    |
| Embolus, pulmonary                                         |
| GI Vascular insufficiency                                  |
| Grafts, removal of infected vascular                       |
| Neoplasm, neurologic                                       |
| Neoplasm-cranial, surgery for (excluding transphenoidal)   |
| Neoplasm-spinal cord surgery or other related procedures   |
| Neurologic surgery, other                                  |
| Subarachnoid hemorrhage/intracranial aneurysm              |
| Subarachnoid hemorrhage/intracranial aneurysm, surgery for |
| Thrombosis, vascular (deep vein)                           |
| Transphenoidal surgery                                     |
| Ulcer disease, peptic                                      |
| Abdomen only trauma                                        |
| Abdomen only trauma, surgery for                           |
| Abdomen/extremity trauma                                   |
| Abdomen/extremity trauma, surgery for                      |
| Abdomen/face trauma                                        |
| Abdomen/face trauma, surgery for                           |
| Abdomen/multiple trauma                                    |
| Abdomen/multiple trauma, surgery for                       |
| Abdomen/pelvis trauma, surgery for                         |
| Abscess/infection-cranial, surgery for                     |
| Anastomosis, vascular                                      |
| Aneurysm, abdominal aortic                                 |
| Aneurysm, abdominal aortic; with dissection                |
| Aneurysm, abdominal aortic; with rupture                   |
| Aneurysm, dissecting aortic                                |
| Aneurysm, thoracic aortic                                  |
| Aneurysm, thoracic aortic; with dissection                 |
| Aneurysm, thoracic aortic; with rupture                    |
| Aneurysm/pseudoaneurysm, other                             |
| Aneurysms, repair of other (except ventricular)            |
| Biopsy, brain                                              |
| Bleeding, GI from esophageal varices/portal hypertension   |
| Bleeding, GI-location unknown                              |
| Bleeding, lower GI                                         |
| Bleeding, upper GI                                         |
| Bleeding-lower GI, surgery for                             |
| Bleeding-other GI, surgery for                             |
| Bleeding-upper GI, surgery for                             |

|    |                                                                                |
|----|--------------------------------------------------------------------------------|
| 1  |                                                                                |
| 2  |                                                                                |
| 3  | Burr hole placement                                                            |
| 4  | CABG alone, coronary artery bypass grafting                                    |
| 5  | CVA, cerebrovascular accident/stroke                                           |
| 6  | Chest/abdomen trauma                                                           |
| 7  | Chest/abdomen trauma, surgery for                                              |
| 8  | Chest/abdomen trauma, surgery for                                              |
| 9  | Chest/extremity trauma                                                         |
| 10 | Chest/extremity trauma, surgery for                                            |
| 11 | Chest/extremity trauma, surgery for                                            |
| 12 | Chest/face trauma                                                              |
| 13 | Chest/face trauma, surgery for                                                 |
| 14 | Chest/face trauma, surgery for                                                 |
| 15 | Chest/multiple trauma                                                          |
| 16 | Chest/multiple trauma, surgery for                                             |
| 17 | Chest/multiple trauma, surgery for                                             |
| 18 | Chest/pelvis trauma                                                            |
| 19 | Chest/pelvis trauma, surgery for                                               |
| 20 | Chest/pelvis trauma, surgery for                                               |
| 21 | Chest/spinal trauma                                                            |
| 22 | Chest/spinal trauma, surgery for                                               |
| 23 | Chest/spinal trauma, surgery for                                               |
| 24 | Chest/thorax only trauma                                                       |
| 25 | Chest/thorax only trauma, surgery for                                          |
| 26 | Chest/thorax only trauma, surgery for                                          |
| 27 | Coagulopathy                                                                   |
| 28 | Complications of prev. peripheral vasc. surgery, surgery for (i.e.ligation of  |
| 29 | bleeder, exploration and evacuation of hematoma, debridement,                  |
| 30 | pseudoaneurysms, clots, fistula, etc.)                                         |
| 31 | Complications of previous GI surgery; surgery for (anastomotic leak, bleeding, |
| 32 | abscess, infection, dehiscence, etc.)                                          |
| 33 | Complications of previous spinal cord surgery, surgery for                     |
| 34 | Cranioplasty and complications from previous craniotomies                      |
| 35 | Cranioplasty and complications from previous craniotomies                      |
| 36 | Head (CNS) only trauma                                                         |
| 37 | Head (CNS) only trauma, surgery for                                            |
| 38 | Head (CNS) only trauma, surgery for                                            |
| 39 | Head/abdomen trauma                                                            |
| 40 | Head/abdomen trauma, surgery for                                               |
| 41 | Head/abdomen trauma, surgery for                                               |
| 42 | Head/chest trauma                                                              |
| 43 | Head/chest trauma, surgery for                                                 |
| 44 | Head/chest trauma, surgery for                                                 |
| 45 | Head/extremity trauma                                                          |
| 46 | Head/extremity trauma, surgery for                                             |
| 47 | Head/extremity trauma, surgery for                                             |
| 48 | Head/face trauma                                                               |
| 49 | Head/face trauma, surgery for                                                  |
| 50 | Head/face trauma, surgery for                                                  |
| 51 | Head/multiple trauma                                                           |
| 52 | Head/multiple trauma, surgery for                                              |
| 53 | Head/multiple trauma, surgery for                                              |
| 54 | Head/pelvis trauma                                                             |
| 55 | Head/pelvis trauma, surgery for                                                |
| 56 | Head/pelvis trauma, surgery for                                                |
| 57 | Head/spinal trauma                                                             |
| 58 | Head/spinal trauma, surgery for                                                |
| 59 | Head/spinal trauma, surgery for                                                |
| 60 | Hematoma, epidural                                                             |
|    | Hematoma, epidural, surgery for                                                |
|    | Hematoma, epidural, surgery for                                                |
|    | Hematoma, subdural                                                             |
|    | Hematoma, subdural, surgery for                                                |
|    | Hematoma, subdural, surgery for                                                |

|    |                                                                             |
|----|-----------------------------------------------------------------------------|
| 1  |                                                                             |
| 2  |                                                                             |
| 3  | Hematomas                                                                   |
| 4  | Hemorrhage (for gastrointestinal bleeding GI-see GI system) (for trauma see |
| 5  | Trauma)                                                                     |
| 6  | Hemorrhage, intra/retroperitoneal                                           |
| 7  | Hemorrhage, postpartum (female only)                                        |
| 8  | Hemorrhage/hematoma, intracranial                                           |
| 9  | Hemorrhage/hematoma-intracranial, surgery for                               |
| 10 | Hemorrhage/hemoptysis, pulmonary                                            |
| 11 | Hemothorax                                                                  |
| 12 | Pelvis/extremity trauma                                                     |
| 13 | Pelvis/extremity trauma, surgery for                                        |
| 14 | Pelvis/face trauma                                                          |
| 15 | Pelvis/hip only trauma, surgery for                                         |
| 16 | Pelvis/multiple trauma, surgery for                                         |
| 17 | Pelvis/spinal trauma                                                        |
| 18 | Pericardial effusion/tamponade                                              |
| 19 | Renal bleeding                                                              |
| 20 | Spinal cord only trauma, surgery for                                        |
| 21 | Spinal cord surgery, other                                                  |
| 22 | Stereotactic procedure                                                      |
| 23 | Subarachnoid hemorrhage/arteriovenous malformation                          |
| 24 | Tamponade, pericardial                                                      |
| 25 |                                                                             |
| 26 |                                                                             |
| 27 |                                                                             |
| 28 |                                                                             |
| 29 |                                                                             |
| 30 |                                                                             |
| 31 |                                                                             |
| 32 |                                                                             |
| 33 |                                                                             |
| 34 |                                                                             |
| 35 |                                                                             |
| 36 |                                                                             |
| 37 |                                                                             |
| 38 |                                                                             |
| 39 |                                                                             |
| 40 |                                                                             |
| 41 |                                                                             |
| 42 |                                                                             |
| 43 |                                                                             |
| 44 |                                                                             |
| 45 |                                                                             |
| 46 |                                                                             |
| 47 |                                                                             |
| 48 |                                                                             |
| 49 |                                                                             |
| 50 |                                                                             |
| 51 |                                                                             |
| 52 |                                                                             |
| 53 |                                                                             |
| 54 |                                                                             |
| 55 |                                                                             |
| 56 |                                                                             |
| 57 |                                                                             |
| 58 |                                                                             |
| 59 |                                                                             |
| 60 |                                                                             |

\*Footnote: The primary diagnoses were reviewed independently by two ICU physicians (HTS, DJN). The two ICU physicians provided their judgment to establish a conservative list of primary diagnoses in order to exclude patients that may have a contraindication for pharmacological VTE prophylaxis based on bleeding risk and an indication for therapeutic anticoagulation. Discrepancies were resolved by discussion.

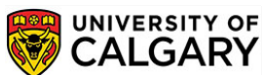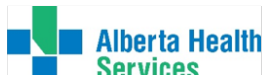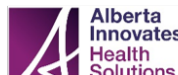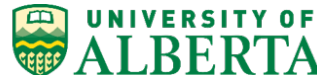

## Adopting Best Practices in DVT/PE Prophylaxis and Fluid Resuscitation in Critical Care

[http://fluidsurveys.com/s/ECG\\_facilitators\\_barriers\\_survey/](http://fluidsurveys.com/s/ECG_facilitators_barriers_survey/)

### Informed Consent

This survey is to identify and evaluate barriers to, and facilitators of, best practices in:

1. Deep Vein Thrombosis (DVT) / Pulmonary Embolism (PE) prophylaxis for medical-surgical ICU patients, and
2. Fluid Resuscitation for medical-surgical ICU patients *without* liver disease, bacterial peritonitis, hepatorenal syndrome or therapeutic paracentesis.

**This survey is not about trauma, neurosurgery or cardiac surgery patients.** Survey responses will be used to develop interventions to facilitate the adoption of best practices in Alberta ICUs.

You are being asked to take part in this survey because you are a healthcare professional working in adult critical care in Alberta. Our survey can be answered in approximately **5 minutes**. There are no direct benefits and/or risks to your participation.

Survey respondents can choose to have their name entered into a draw for \$20 Starbucks gift cards (one name will be drawn per week; non-winners will remain in the draw each week).

Your participation in this survey is voluntary and you are free to stop at any time. Your responses will be kept confidential. Your de-identified data will be stored in a password-protected database, and responses will only be presented in aggregate. The survey has peer-reviewed funding and has received ethics approval from the University of Calgary. **Your decision to complete and submit this survey will indicate your consent to participate.** Should you decide to withdraw your participation before submitting the survey, your data will be deleted.

If you have questions about this survey or your participation, please contact:

Rebecca Brundin-Mather, Research Coordinator, at [brundin@ucalgary.ca](mailto:brundin@ucalgary.ca).

If you have questions about your rights as a participant, you may contact the University of Calgary Conjoint Research Ethics Board at (403) 220-7990. This office is not affiliated with the study team.

Thank you in advance for taking the time to complete the survey!

Kind regards,

Tom Stelfox, MD, PhD, FRCPC

Intensive Care Physician

Scientific Director, AHS, Critical Care Strategic Clinical Network

I agree to participate in this survey       I do **NOT** wish to participate in this survey (online-version)

## Demographics

### 1. What is your professional group?

- ICU physician       Nurse Clinician       Pharmacist  
 ICU resident       Nurse Educator       Other: \_\_\_\_\_  
 ICU fellow       Bedside Nurse

### 2. Approximately how many years have you worked in:

Health care       Critical care

### 3. In which hospital(s) do you primarily work? (Select all that apply)

- Chinook Regional Hospital  
 Foothills Medical Centre  
 Grand Prairie QE II Hospital  
 Grey Nuns Hospital  
 Medicine Hat Regional Hospital  
 Misericordia Hospital  
 Northern Lights Regional Health Centre  
 Peter Lougheed Centre  
 Red Deer Regional Hospital  
 Rockyview General Hospital  
 Royal Alexander Hospital  
 South Health Campus  
 Sturgeon Community Hospital  
 University of Alberta Hospital

## DVT/PE Prevention

We are interested in your perceptions of the different forms of prophylaxes commonly used to prevent Deep Vein Thrombosis (DVT) and Pulmonary Embolism (PE) in medical-surgical ICU patients (not trauma, neurosurgery or cardiac surgery patients). Common prophylaxes include:

- Low molecular weight heparin (**LMWH** e.g., Enoxaparin, Dalteparin, Tinzaparin)
- Unfractionated heparin (**UFH**, regular Heparin)
- **Mechanical** prophylaxis (i.e., sequential compression devices)

We appreciate that practices vary across units and providers. For each of the following questions, please select the **best response option** OR **options**, to the best of your knowledge (more than one response option can be selected).

4. Which form(s) of prophylaxis is/are most effective at preventing:

|                            | LMWH                     | UFH                      | Mechanical               | Unsure                   |
|----------------------------|--------------------------|--------------------------|--------------------------|--------------------------|
| Deep Vein Thrombosis (DVT) | <input type="checkbox"/> | <input type="checkbox"/> | <input type="checkbox"/> | <input type="checkbox"/> |
| Pulmonary Embolism (PE)    | <input type="checkbox"/> | <input type="checkbox"/> | <input type="checkbox"/> | <input type="checkbox"/> |

5. Which form(s) of prophylaxis is/are most cost-effective?

| LMWH                     | UFH                      | Mechanical               | Unsure                   |
|--------------------------|--------------------------|--------------------------|--------------------------|
| <input type="checkbox"/> | <input type="checkbox"/> | <input type="checkbox"/> | <input type="checkbox"/> |

6. Which form(s) of *pharmacological* prophylaxis has/have the lowest risk of:

|                                        | LMWH                     | UFH                      | Unsure                   |
|----------------------------------------|--------------------------|--------------------------|--------------------------|
| Bleeding                               | <input type="checkbox"/> | <input type="checkbox"/> | <input type="checkbox"/> |
| Heparin Induced Thrombocytopenia (HIT) | <input type="checkbox"/> | <input type="checkbox"/> | <input type="checkbox"/> |

7. To what extent do you think best practices for preventing DVT/PE are followed in your ICU (i.e., the patient receives the right prophylaxis with the right dose at the right time)?

|                       |                       |                       |                       |                       |                       |                       |                       |
|-----------------------|-----------------------|-----------------------|-----------------------|-----------------------|-----------------------|-----------------------|-----------------------|
| <input type="radio"/> |
| <b>1</b>              | <b>2</b>              | <b>3</b>              | <b>4</b>              | <b>5</b>              | <b>6</b>              | <b>7</b>              | Unsure                |
| <b>Never</b>          | <b>Sometimes</b>      |                       |                       | <b>Always</b>         |                       |                       |                       |

**Intravenous Fluid Resuscitation**

We are now interested in your perceptions of the different types of intravenous fluids commonly used for fluid resuscitation (i.e., fluid boluses) in the ICU for medical-surgical patients, **excluding** patients with liver disease, bacterial peritonitis, or undergoing therapeutic paracentesis as they may have different fluid needs. Common resuscitation fluids include:

- **Human Albumin** (Albumin 5% or Albumin 25%)
- **Crystalloid solutions** (e.g., normal saline, ringers lactate, and plasma-lyte)

Again, we appreciate that clinical practices vary across units and providers. For each of the following questions, please select the **best response option** OR **options**, to the best of your knowledge (more than one response option can be selected).

8. Which form(s) of IV resuscitation fluid is/are most effective for resuscitation?

Albumin                       Crystalloids                       Unsure

9. Which form(s) of IV resuscitation fluid(s) is/are most cost-effective?

Albumin                       Crystalloids                       Unsure

10. Which form(s) of IV resuscitation fluid(s) has/have the lowest risk of:

|                                         | Albumin                  | Crystalloids             | Unsure                   |
|-----------------------------------------|--------------------------|--------------------------|--------------------------|
| Fluid overload (peripheral / pulmonary) | <input type="checkbox"/> | <input type="checkbox"/> | <input type="checkbox"/> |
| Contracting an infectious disease       | <input type="checkbox"/> | <input type="checkbox"/> | <input type="checkbox"/> |

11. To what extent do you think *best practices* for prescribing fluid boluses are followed **in your ICU** (i.e., the patient receives the right fluid with the right dose at the right time)?

|                       |                       |                       |                       |                       |                       |                       |                       |
|-----------------------|-----------------------|-----------------------|-----------------------|-----------------------|-----------------------|-----------------------|-----------------------|
| <input type="radio"/> |
| <b>1</b>              | <b>2</b>              | <b>3</b>              | <b>4</b>              | <b>5</b>              | <b>6</b>              | <b>7</b>              | Unsure                |
| <b>Never</b>          |                       |                       | <b>Sometimes</b>      |                       |                       | <b>Always</b>         |                       |



## **Barriers to Best Practices**

A number of ICU or 'systems' factors have been identified as potential barriers to best practices. We are interested in what you think are barriers **in your ICU** to prescribing:

1. LMWH over UFH for DVT/PE prophylaxis
2. Crystalloid solutions over Albumin for fluid resuscitation

12. Which of the following factors are current barriers in your ICU to prescribing...

|                                                                                                                                  | <b>LMWH over UFH</b>   |                       | <b>Crystalloids over Albumin</b> |                       |
|----------------------------------------------------------------------------------------------------------------------------------|------------------------|-----------------------|----------------------------------|-----------------------|
|                                                                                                                                  | <b>Current Barrier</b> | Unsure                | <b>Current Barrier</b>           | Unsure                |
| An ICU culture with an unclear or slow process for practice change                                                               | <input type="radio"/>  | <input type="radio"/> | <input type="radio"/>            | <input type="radio"/> |
| Not enough support from physicians                                                                                               | <input type="radio"/>  | <input type="radio"/> | <input type="radio"/>            | <input type="radio"/> |
| Not enough support from nurses                                                                                                   | <input type="radio"/>  | <input type="radio"/> | <input type="radio"/>            | <input type="radio"/> |
| Not enough support from pharmacists                                                                                              | <input type="radio"/>  | <input type="radio"/> | <input type="radio"/>            | <input type="radio"/> |
| Clinical leaders in my ICU with strong clinical preferences                                                                      | <input type="radio"/>  | <input type="radio"/> | <input type="radio"/>            | <input type="radio"/> |
| No clinical guidelines or orders sets in my ICU to guide the practice                                                            | <input type="radio"/>  | <input type="radio"/> | <input type="radio"/>            | <input type="radio"/> |
| Guidelines exist in my ICU, but they do not recommend LMWH over UFH / crystalloids over albumin                                  | <input type="radio"/>  | <input type="radio"/> | <input type="radio"/>            | <input type="radio"/> |
| Insufficient knowledge/understanding the evidence base for the practice.                                                         | <input type="radio"/>  | <input type="radio"/> | <input type="radio"/>            | <input type="radio"/> |
| <b>None</b> of the above factors are current barriers in my ICU to prescribing....                                               | <input type="radio"/>  |                       | <input type="radio"/>            |                       |
| Please note any other factors that may be barriers to prescribing LMWH over UFH and/or crystalloids over albumin. Specify below. |                        |                       |                                  |                       |
|                                                                                                                                  |                        |                       |                                  |                       |

### **Strategies to Encourage Best Practices**

A number of strategies have been identified as potential facilitators to changing clinical practice. We are interested in your perceptions of different strategies that have been used to encourage:

1. LMWH over UFH for DVT/PE prophylaxis
2. Crystalloid solutions over Albumin for fluid resuscitation

13. Which of the following strategies are currently used in your ICU to encourage...

|                                                                                  | <b>LMWH over UFH</b>  | <b>Crystalloids over Albumin</b> |
|----------------------------------------------------------------------------------|-----------------------|----------------------------------|
| 1. On-site education (in-services, rounds, journal clubs, orientations)          | <input type="radio"/> | <input type="radio"/>            |
| 2. Educational posters (in the unit)                                             | <input type="radio"/> | <input type="radio"/>            |
| 3. Educational pocket cards                                                      | <input type="radio"/> | <input type="radio"/>            |
| 4. Email-based educational presentations                                         | <input type="radio"/> | <input type="radio"/>            |
| 5. Web-based educational tools                                                   | <input type="radio"/> | <input type="radio"/>            |
| 6. Verbal reminders to physicians from pharmacists                               | <input type="radio"/> | <input type="radio"/>            |
| 7. Verbal reminders to physicians from bedside nurses                            | <input type="radio"/> | <input type="radio"/>            |
| 8. Pre-set orders                                                                | <input type="radio"/> | <input type="radio"/>            |
| 9. Computerized physician order entry & reminders                                | <input type="radio"/> | <input type="radio"/>            |
| 10. Web-based practice reminders                                                 | <input type="radio"/> | <input type="radio"/>            |
| 11. Daily goals checklist                                                        | <input type="radio"/> | <input type="radio"/>            |
| 12. Audit & feedback of prescription rates                                       | <input type="radio"/> | <input type="radio"/>            |
| 13. A quality improvement team focusing on practice change                       | <input type="radio"/> | <input type="radio"/>            |
| 14. Participation in a quality improvement network                               | <input type="radio"/> | <input type="radio"/>            |
| 15. A local clinical leader championing the practice                             | <input type="radio"/> | <input type="radio"/>            |
| 16. Other strategy used. Please specify:                                         | <input type="radio"/> | <input type="radio"/>            |
| 17. Other strategy used. Please specify:                                         | <input type="radio"/> | <input type="radio"/>            |
| <b>NO</b> strategies are currently being used in my ICU encourage this practice: | <input type="radio"/> | <input type="radio"/>            |

14. From the same list of strategies, please select the **5 best strategies** that you believe would work **in your ICU** to encourage:

(1) LMWH over UFH for DVT/PE prophylaxis

(2) Crystalloid solutions over Albumin for fluid resuscitation

(Select up to 5 strategies, regardless whether the strategy is used in your ICU or not)

**Select up to 5 in each column**

| Strategy to change clinical practice                                    | LMWH over UFH            | Crystalloids over Albumin |
|-------------------------------------------------------------------------|--------------------------|---------------------------|
| 1. On-site education (in-services, rounds, journal clubs, orientations) | <input type="checkbox"/> | <input type="checkbox"/>  |
| 2. Educational posters (in the unit)                                    | <input type="checkbox"/> | <input type="checkbox"/>  |
| 3. Educational pocket cards                                             | <input type="checkbox"/> | <input type="checkbox"/>  |
| 4. Email-based educational presentations                                | <input type="checkbox"/> | <input type="checkbox"/>  |
| 5. Web-based educational tools                                          | <input type="checkbox"/> | <input type="checkbox"/>  |
| 6. Verbal reminders to physicians from pharmacists                      | <input type="checkbox"/> | <input type="checkbox"/>  |
| 7. Verbal reminders to physicians from bedside nurses                   | <input type="checkbox"/> | <input type="checkbox"/>  |
| 8. Pre-set orders                                                       | <input type="checkbox"/> | <input type="checkbox"/>  |
| 9. Computerized physician order entry & reminders                       | <input type="checkbox"/> | <input type="checkbox"/>  |
| 10. Web-based practice reminders                                        | <input type="checkbox"/> | <input type="checkbox"/>  |
| 11. Daily goals checklist                                               | <input type="checkbox"/> | <input type="checkbox"/>  |
| 12. Audit & feedback of prescription rates                              | <input type="checkbox"/> | <input type="checkbox"/>  |
| 13. A quality improvement team to focus on practice change              | <input type="checkbox"/> | <input type="checkbox"/>  |
| 14. Participation in a quality improvement network                      | <input type="checkbox"/> | <input type="checkbox"/>  |
| 15. A local clinical leader to champion the practice                    | <input type="checkbox"/> | <input type="checkbox"/>  |
| 16. Other strategy. Please specify:                                     | <input type="checkbox"/> | <input type="checkbox"/>  |
| 17. Other strategy. Please specify:                                     | <input type="checkbox"/> | <input type="checkbox"/>  |

1  
2  
3 15. Finally, please provide any additional comments in the text box below.  
4  
5

6  
7  
8  
9  
10  
11  
12

13  
14  
15 Please select the check box(es) below to have your name entered in the Starbucks coffee card  
16 draws and/or to receive the study results.  
17

- 18  
19  Yes, I would like my name entered in the coffee card draws.  
20  
21  Yes, I would like to receive the results from this study.  
22  
23

24  
25 My email address is:  
26

27  
28 N.B. E-mail addresses will be kept confidential and will not be used to contact you for any  
29 reason other than those noted above.  
30

31  
32

33  
34  
35  
36 ---End of Survey ---  
37

38  
39  
40 **Thank you for helping us improve care!**  
41

42  
43 **Please return completed surveys to:**  
44

45  
46 Dr. Tom Stelfox  
47 Department of Critical Care Medicine  
48 Foothills Medical Centre  
49

OR

Rebecca Brundin-Mather  
Ward of the 21<sup>st</sup> Century  
GD01 Teaching, Research, Wellness Bldg  
University of Calgary, 3280 Hospital Dr NW  
Calgary, AB T2N 4Z6

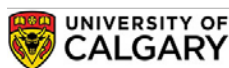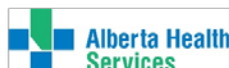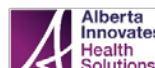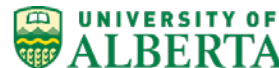

**Supplemental Content 3.** Intensive care unit patient characteristics for the study period (January 1, 2014-December 31, 2014)

| <b>Demographic variable</b>     | <b>Population<br/>(N=6,946)</b> | <b>Adoption cohort<br/>70.7%<br/>(N=4,931)</b> | <b>De-adoption<br/>cohort<br/>93.1%<br/>(N=6,467)</b> |
|---------------------------------|---------------------------------|------------------------------------------------|-------------------------------------------------------|
| Age, median (IQR)               | 60 (46-71)                      | 61 (47-71)                                     | 61 (46-71)                                            |
| Female                          | 41.6 (2,888)                    | 43.3 (2,134)                                   | 41.8 (2,703)                                          |
| Comorbidities                   |                                 |                                                |                                                       |
| AIDS                            | 0.6 (42)                        | 0.7 (33)                                       | 0.5 (35)                                              |
| Chronic dialysis                | 3.5 (240)                       | 3.8 (186)                                      | 3.5 (225)                                             |
| Chronic heart failure           | 6.4 (444)                       | 7.4 (364)                                      | 6.5 (419)                                             |
| Cirrhosis                       | 5.9 (407)                       | 6.0 (294)                                      | 0.0 (0)                                               |
| Diabetes                        | 19.7 (1,366)                    | 21.6 (1,065)                                   | 19.9 (1,284)                                          |
| Hepatic failure                 | 3.9 (269)                       | 4.1 (203)                                      | 0.0 (0)                                               |
| Immune suppression              | 8.5 (589)                       | 9.4 (463)                                      | 8.2 (532)                                             |
| Leukemia or multiple<br>myeloma | 1.3 (88)                        | 1.4 (69)                                       | 1.3 (86)                                              |
| Lymphoma                        | 1.1 (77)                        | 1.2 (61)                                       | 1.2 (75)                                              |
| Metastatic cancer               | 3.9 (272)                       | 4.1 (203)                                      | 4.1 (262)                                             |
| Respiratory insufficiency       | 12.0 (833)                      | 14.6 (722)                                     | 12.5 (810)                                            |
| Any comorbidity                 | 44.6 (3,100)                    | 49.3 (2,431)                                   | 40.6 (2,625)                                          |
| Admitted from                   |                                 |                                                |                                                       |
| Emergency department            | 36.6 (2,540)                    | 36.7 (1,808)                                   | 36.5 (2,358)                                          |
| Operating / recovery room       | 21.9 (1,520)                    | 18.3 (902)                                     | 22.2 (1,437)                                          |
| Hospital ward                   | 26.7 (1,858)                    | 28.1 (1,386)                                   | 26.3 (1,702)                                          |
| Other hospital                  | 10.4 (722)                      | 11.9 (589)                                     | 10.5 (677)                                            |
| Other location                  | 4.3 (300)                       | 4.9 (243)                                      | 4.5 (288)                                             |
| Unknown                         | 0.1 (6)                         | 0.1 (3)                                        | 0.1 (5)                                               |
| Admission type                  |                                 |                                                |                                                       |

|                                                         |                 |                 |                 |
|---------------------------------------------------------|-----------------|-----------------|-----------------|
| Elective surgery                                        | 9.4 (655)       | 8.1 (399)       | 9.5 (614)       |
| Emergent surgery                                        | 16.8 (1,170)    | 13.8 (681)      | 17.3 (1,120)    |
| No surgery                                              | 73.1 (5,078)    | 78.1 (3,851)    | 72.5 (4,690)    |
| Unknown                                                 | 0.6 (43)        | 0.0 (0)         | 0.7 (43)        |
| Reason for ICU admission                                |                 |                 |                 |
| Medical                                                 | 59.9 (4,163)    | 69.4 (3,420)    | 58.7 (3,797)    |
| Surgical                                                | 25.8 (1,789)    | 24.1 (1,190)    | 26.2 (1,696)    |
| Neurological                                            | 9.3 (649)       | 4.1 (200)       | 9.8 (632)       |
| Trauma                                                  | 4.3 (302)       | 2.5 (121)       | 4.6 (299)       |
| Unknown                                                 | 0.6 (43)        | 0.0 (0)         | 0.7 (43)        |
| APACHE II Score on ICU admission, median (IQR)          | 19 (14-26)      | 20 (15-26)      | 19 (14-25)      |
| Glasgow Coma Scale score on ICU admission, median (IQR) | 14 (11-15)      | 14 (11-15)      | 14 (11-15)      |
| Intubation                                              | 65.5 (4,553)    | 66.2 (3,264)    | 64.9 (4,195)    |
| Invasive ventilation                                    | 68.3 (4,747)    | 68.8 (3,393)    | 67.8 (4,387)    |
| Duration, median hours (IQR)                            | 51 (18-133)     | 62 (25-143)     | 50 (18-132)     |
| Non-invasive ventilation                                | 13.1 (913)      | 16.2 (798)      | 13.6 (878)      |
| Duration, median hours (IQR)                            | 24 (8-63)       | 28 (9-68)       | 24 (6-65)       |
| ICU length of stay, median days (IQR)                   | 3.7 (1.8-7.7)   | 4.3 (2.4-8.3)   | 3.7 (1.8-7.6)   |
| Hospital length of stay, median days (IQR)              | 13.3 (6.1-29.5) | 13.9 (6.8-30.0) | 13.2 (6.1-29.3) |
| ICU mortality                                           | 14.1 (981)      | 12.2 (601)      | 12.9 (837)      |
| Hospital mortality                                      | 21.0 (1,462)    | 19.9 (979)      | 19.5 (1,260)    |

**Abbreviations:** **AIDS**=autoimmune deficiency syndrome, **APACHE II**=Acute Physiology and Chronic Health Evaluation II, **ICU**=intensive care unit, **IQR**=interquartile range,

1  
2  
3  
4  
5  
6  
7  
8  
9  
10  
11  
12  
13  
14  
15  
16  
17  
18  
19  
20  
21  
22  
23  
24  
25  
26  
27  
28  
29  
30  
31  
32  
33  
34  
35  
36  
37  
38  
39  
40  
41  
42  
43  
44  
45  
46  
47

**Supplemental Content 4. Flow of patients**

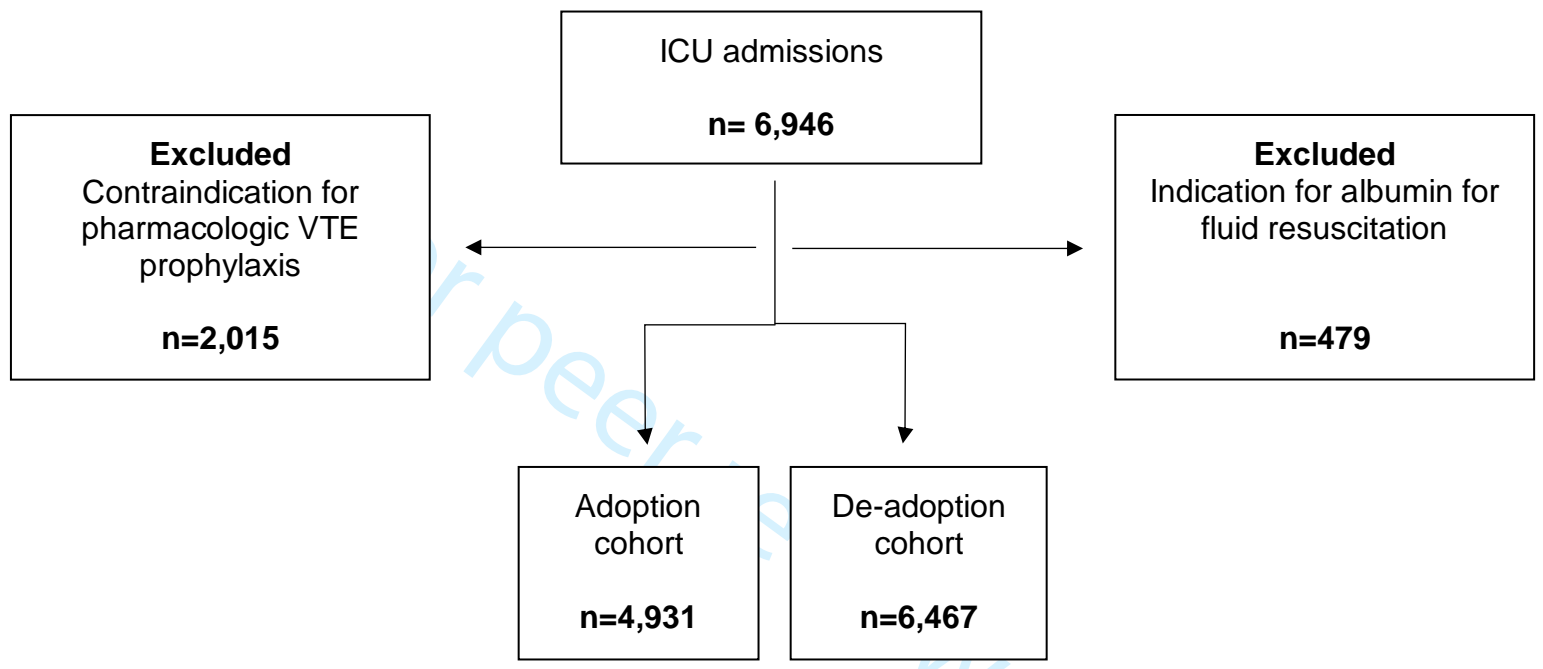

*Footnote:* Adoption cohort = Recommended to receive low molecular weight heparin for venous thromboembolism prophylaxis; de-adoption cohort = Recommended to NOT receive albumin for fluid resuscitation

**Supplemental Content 5. Venous thromboembolism prophylaxis by intensive care unit patient day**



*Footnote:* Percent of patients may add to greater than 100% because patients may have received more than one form of venous thromboembolism prophylaxis on a given patient day.

*Abbreviation:* ICU=intensive care unit, LMWH=low molecular weight heparin, UFH=unfractionated heparin



**Supplemental Content 6.** The use of high value practices (low molecular weight heparin for venous thromboembolism prophylaxis) and the use of low value practices (albumin for fluid resuscitation) by study intensive care unit



*Footnote:* all "C" sites indicate ICU in Calgary and all "E" sites indicate ICU in Edmonton

\*% of patient-days for VTE prophylaxis and % of patients for albumin

**Supplemental Content 7. Survey participant characteristics**

| <b>Professional group</b>         | <b>% (N)</b>        |
|-----------------------------------|---------------------|
| Attending physician               | 24.7 (64)           |
| Fellow                            | 6.2 (16)            |
| Resident                          | 12.4 (32)           |
| Nurse practitioner                | 5.0 (13)            |
| Nurse manager / charge nurse      | 10.0 (26)           |
| Nurse educator                    | 8.5 (22)            |
| Bedside nurse                     | 23.9 (62)           |
| Pharmacist                        | 9.3 (24)            |
| <b>Years worked in ICU</b>        | <b>Median (IQR)</b> |
| Attending physician               | 14.0 (9.8-22.0)     |
| Clinical fellow                   | 1.8 (1.0-2.3)       |
| Resident                          | 0.3 (0.1-1.0)       |
| Nurse practitioner                | 15.0 (9.0-20.0)     |
| Nurse manager / charge nurse      | 11.5 (7.3-18.8)     |
| Nurse educator                    | 19.0 (10.3-21.5)    |
| Bedside nurse                     | 7.5 (2.5-12.0)      |
| Pharmacist                        | 5.3 (3.0-10.8)      |
| <b>Years worked in healthcare</b> | <b>Median (IQR)</b> |
| Attending physician               | 19.0 (14.8-25.3)    |
| Clinical fellow                   | 8.0 (7.0-9.5)       |
| Resident                          | 3.0 (2.0-5.1)       |
| Nurse practitioner                | 15.0 (12.0-25.0)    |
| Nurse manager / charge nurse      | 16.5 (12.5-24.0)    |
| Nurse educator                    | 21.0 (13.0-26.0)    |
| Bedside nurse                     | 10.0 (6.0-16.0)     |
| Pharmacist                        | 10.5 (6.1-14.3)     |
