# Supplementary material for: Barriers and facilitators to adopting high value practices and de-adopting low value practices in Canadian intensive care units: a multimethod study
Source: PubMed Central journal article supplement — BMJ Open. 2019 Mar 15;9(3):e024159. doi: 10.1136/bmjopen-2018-024159 (PMC6429967; doi:10.1136/bmjopen-2018-024159), 2019-03-15
Supplement: bmjopen-2018-024159supp001.pdf [file bmjopen-2018-024159supp001.pdf]

**Supplemental Content 1.** List of diagnoses with a potential contraindication to receive pharmacological venous thromboembolism prophylaxis or indication for therapeutic anticoagulation\*

|                                                            |
|------------------------------------------------------------|
| Arteriovenous malformation, surgery for                    |
| Embolus, pulmonary                                         |
| GI Vascular insufficiency                                  |
| Grafts, removal of infected vascular                       |
| Neoplasm, neurologic                                       |
| Neoplasm-cranial, surgery for (excluding transphenoidal)   |
| Neoplasm-spinal cord surgery or other related procedures   |
| Neurologic surgery, other                                  |
| Subarachnoid hemorrhage/intracranial aneurysm              |
| Subarachnoid hemorrhage/intracranial aneurysm, surgery for |
| Thrombosis, vascular (deep vein)                           |
| Transphenoidal surgery                                     |
| Ulcer disease, peptic                                      |
| Abdomen only trauma                                        |
| Abdomen only trauma, surgery for                           |
| Abdomen/extremity trauma                                   |
| Abdomen/extremity trauma, surgery for                      |
| Abdomen/face trauma                                        |
| Abdomen/face trauma, surgery for                           |
| Abdomen/multiple trauma                                    |
| Abdomen/multiple trauma, surgery for                       |
| Abdomen/pelvis trauma, surgery for                         |
| Abscess/infection-cranial, surgery for                     |
| Anastomosis, vascular                                      |
| Aneurysm, abdominal aortic                                 |
| Aneurysm, abdominal aortic; with dissection                |
| Aneurysm, abdominal aortic; with rupture                   |
| Aneurysm, dissecting aortic                                |
| Aneurysm, thoracic aortic                                  |
| Aneurysm, thoracic aortic; with dissection                 |
| Aneurysm, thoracic aortic; with rupture                    |
| Aneurysm/pseudoaneurysm, other                             |
| Aneurysms, repair of other (except ventricular)            |
| Biopsy, brain                                              |
| Bleeding, GI from esophageal varices/portal hypertension   |
| Bleeding, GI-location unknown                              |
| Bleeding, lower GI                                         |
| Bleeding, upper GI                                         |
| Bleeding-lower GI, surgery for                             |
| Bleeding-other GI, surgery for                             |
| Bleeding-upper GI, surgery for                             |

|                                                                                                                                                                                    |
|------------------------------------------------------------------------------------------------------------------------------------------------------------------------------------|
| Burr hole placement                                                                                                                                                                |
| CABG alone, coronary artery bypass grafting                                                                                                                                        |
| CVA, cerebrovascular accident/stroke                                                                                                                                               |
| Chest/abdomen trauma                                                                                                                                                               |
| Chest/abdomen trauma, surgery for                                                                                                                                                  |
| Chest/extremity trauma                                                                                                                                                             |
| Chest/extremity trauma, surgery for                                                                                                                                                |
| Chest/face trauma                                                                                                                                                                  |
| Chest/face trauma, surgery for                                                                                                                                                     |
| Chest/multiple trauma                                                                                                                                                              |
| Chest/multiple trauma, surgery for                                                                                                                                                 |
| Chest/pelvis trauma                                                                                                                                                                |
| Chest/pelvis trauma, surgery for                                                                                                                                                   |
| Chest/spinal trauma                                                                                                                                                                |
| Chest/spinal trauma, surgery for                                                                                                                                                   |
| Chest/thorax only trauma                                                                                                                                                           |
| Chest/thorax only trauma, surgery for                                                                                                                                              |
| Coagulopathy                                                                                                                                                                       |
| Complications of prev. peripheral vasc. surgery, surgery for (i.e.ligation of bleeder, exploration and evacuation of hematoma, debridement, pseudoaneurysms, clots, fistula, etc.) |
| Complications of previous GI surgery; surgery for (anastomotic leak, bleeding, abscess, infection, dehiscence, etc.)                                                               |
| Complications of previous spinal cord surgery, surgery for                                                                                                                         |
| Cranioplasty and complications from previous craniotomies                                                                                                                          |
| Head (CNS) only trauma                                                                                                                                                             |
| Head (CNS) only trauma, surgery for                                                                                                                                                |
| Head/abdomen trauma                                                                                                                                                                |
| Head/abdomen trauma, surgery for                                                                                                                                                   |
| Head/chest trauma                                                                                                                                                                  |
| Head/chest trauma, surgery for                                                                                                                                                     |
| Head/extremity trauma                                                                                                                                                              |
| Head/extremity trauma, surgery for                                                                                                                                                 |
| Head/face trauma                                                                                                                                                                   |
| Head/face trauma, surgery for                                                                                                                                                      |
| Head/multiple trauma                                                                                                                                                               |
| Head/multiple trauma, surgery for                                                                                                                                                  |
| Head/pelvis trauma                                                                                                                                                                 |
| Head/pelvis trauma, surgery for                                                                                                                                                    |
| Head/spinal trauma                                                                                                                                                                 |
| Head/spinal trauma, surgery for                                                                                                                                                    |
| Hematoma, epidural                                                                                                                                                                 |
| Hematoma, epidural, surgery for                                                                                                                                                    |
| Hematoma, subdural                                                                                                                                                                 |
| Hematoma, subdural, surgery for                                                                                                                                                    |

|                                                                                     |
|-------------------------------------------------------------------------------------|
| Hematomas                                                                           |
| Hemorrhage (for gastrointestinal bleeding GI-see GI system) (for trauma see Trauma) |
| Hemorrhage, intra/retroperitoneal                                                   |
| Hemorrhage, postpartum (female only)                                                |
| Hemorrhage/hematoma, intracranial                                                   |
| Hemorrhage/hematoma-intracranial, surgery for                                       |
| Hemorrhage/hemoptysis, pulmonary                                                    |
| Hemothorax                                                                          |
| Pelvis/extremity trauma                                                             |
| Pelvis/extremity trauma, surgery for                                                |
| Pelvis/face trauma                                                                  |
| Pelvis/hip only trauma, surgery for                                                 |
| Pelvis/multiple trauma, surgery for                                                 |
| Pelvis/spinal trauma                                                                |
| Pericardial effusion/tamponade                                                      |
| Renal bleeding                                                                      |
| Spinal cord only trauma, surgery for                                                |
| Spinal cord surgery, other                                                          |
| Stereotactic procedure                                                              |
| Subarachnoid hemorrhage/arteriovenous malformation                                  |
| Tamponade, pericardial                                                              |

*\*Footnote:* The primary diagnoses were reviewed independently by two ICU physicians (HTS, DJN). The two ICU physicians provided their judgment to establish a conservative list of primary diagnoses in order to exclude patients that may have a contraindication for pharmacological VTE prophylaxis based on bleeding risk and an indication for therapeutic anticoagulation. Discrepancies were resolved by discussion.
