# Supplementary material for: Barriers and facilitators to adopting high value practices and de-adopting low value practices in Canadian intensive care units: a multimethod study
Source: PubMed Central journal article supplement — BMJ Open. 2019 Mar 15;9(3):e024159. doi: 10.1136/bmjopen-2018-024159 (PMC6429967; doi:10.1136/bmjopen-2018-024159), 2019-03-15
Supplement: bmjopen-2018-024159supp003.pdf [file bmjopen-2018-024159supp003.pdf]

**Supplemental Content 3.** Intensive care unit patient characteristics for the study period (January 1, 2014-December 31, 2014)

| <b>Demographic variable</b>     | <b>Population<br/>(N=6,946)</b> | <b>Adoption cohort<br/>70.7%<br/>(N=4,931)</b> | <b>De-adoption<br/>cohort<br/>93.1%<br/>(N=6,467)</b> |
|---------------------------------|---------------------------------|------------------------------------------------|-------------------------------------------------------|
| Age, median (IQR)               | 60 (46-71)                      | 61 (47-71)                                     | 61 (46-71)                                            |
| Female                          | 41.6 (2,888)                    | 43.3 (2,134)                                   | 41.8 (2,703)                                          |
| Comorbidities                   |                                 |                                                |                                                       |
| AIDS                            | 0.6 (42)                        | 0.7 (33)                                       | 0.5 (35)                                              |
| Chronic dialysis                | 3.5 (240)                       | 3.8 (186)                                      | 3.5 (225)                                             |
| Chronic heart failure           | 6.4 (444)                       | 7.4 (364)                                      | 6.5 (419)                                             |
| Cirrhosis                       | 5.9 (407)                       | 6.0 (294)                                      | 0.0 (0)                                               |
| Diabetes                        | 19.7 (1,366)                    | 21.6 (1,065)                                   | 19.9 (1,284)                                          |
| Hepatic failure                 | 3.9 (269)                       | 4.1 (203)                                      | 0.0 (0)                                               |
| Immune suppression              | 8.5 (589)                       | 9.4 (463)                                      | 8.2 (532)                                             |
| Leukemia or multiple<br>myeloma | 1.3 (88)                        | 1.4 (69)                                       | 1.3 (86)                                              |
| Lymphoma                        | 1.1 (77)                        | 1.2 (61)                                       | 1.2 (75)                                              |
| Metastatic cancer               | 3.9 (272)                       | 4.1 (203)                                      | 4.1 (262)                                             |
| Respiratory insufficiency       | 12.0 (833)                      | 14.6 (722)                                     | 12.5 (810)                                            |
| Any comorbidity                 | 44.6 (3,100)                    | 49.3 (2,431)                                   | 40.6 (2,625)                                          |
| Admitted from                   |                                 |                                                |                                                       |
| Emergency department            | 36.6 (2,540)                    | 36.7 (1,808)                                   | 36.5 (2,358)                                          |
| Operating / recovery room       | 21.9 (1,520)                    | 18.3 (902)                                     | 22.2 (1,437)                                          |
| Hospital ward                   | 26.7 (1,858)                    | 28.1 (1,386)                                   | 26.3 (1,702)                                          |
| Other hospital                  | 10.4 (722)                      | 11.9 (589)                                     | 10.5 (677)                                            |
| Other location                  | 4.3 (300)                       | 4.9 (243)                                      | 4.5 (288)                                             |
| Unknown                         | 0.1 (6)                         | 0.1 (3)                                        | 0.1 (5)                                               |
| Admission type                  |                                 |                                                |                                                       |

|                                                         |                 |                 |                 |
|---------------------------------------------------------|-----------------|-----------------|-----------------|
| Elective surgery                                        | 9.4 (655)       | 8.1 (399)       | 9.5 (614)       |
| Emergent surgery                                        | 16.8 (1,170)    | 13.8 (681)      | 17.3 (1,120)    |
| No surgery                                              | 73.1 (5,078)    | 78.1 (3,851)    | 72.5 (4,690)    |
| Unknown                                                 | 0.6 (43)        | 0.0 (0)         | 0.7 (43)        |
| Reason for ICU admission                                |                 |                 |                 |
| Medical                                                 | 59.9 (4,163)    | 69.4 (3,420)    | 58.7 (3,797)    |
| Surgical                                                | 25.8 (1,789)    | 24.1 (1,190)    | 26.2 (1,696)    |
| Neurological                                            | 9.3 (649)       | 4.1 (200)       | 9.8 (632)       |
| Trauma                                                  | 4.3 (302)       | 2.5 (121)       | 4.6 (299)       |
| Unknown                                                 | 0.6 (43)        | 0.0 (0)         | 0.7 (43)        |
| APACHE II Score on ICU admission, median (IQR)          | 19 (14-26)      | 20 (15-26)      | 19 (14-25)      |
| Glasgow Coma Scale score on ICU admission, median (IQR) | 14 (11-15)      | 14 (11-15)      | 14 (11-15)      |
| Intubation                                              | 65.5 (4,553)    | 66.2 (3,264)    | 64.9 (4,195)    |
| Invasive ventilation                                    | 68.3 (4,747)    | 68.8 (3,393)    | 67.8 (4,387)    |
| Duration, median hours (IQR)                            | 51 (18-133)     | 62 (25-143)     | 50 (18-132)     |
| Non-invasive ventilation                                | 13.1 (913)      | 16.2 (798)      | 13.6 (878)      |
| Duration, median hours (IQR)                            | 24 (8-63)       | 28 (9-68)       | 24 (6-65)       |
| ICU length of stay, median days (IQR)                   | 3.7 (1.8-7.7)   | 4.3 (2.4-8.3)   | 3.7 (1.8-7.6)   |
| Hospital length of stay, median days (IQR)              | 13.3 (6.1-29.5) | 13.9 (6.8-30.0) | 13.2 (6.1-29.3) |
| ICU mortality                                           | 14.1 (981)      | 12.2 (601)      | 12.9 (837)      |
| Hospital mortality                                      | 21.0 (1,462)    | 19.9 (979)      | 19.5 (1,260)    |

*Abbreviations: AIDS*=autoimmune deficiency syndrome, **APACHE II**=Acute Physiology and Chronic Health Evaluation II, **ICU**=intensive care unit, **IQR**=interquartile range,
