# Supplementary material for: Barriers and facilitators to adopting high value practices and de-adopting low value practices in Canadian intensive care units: a multimethod study
Source: PubMed Central journal article supplement — BMJ Open. 2019 Mar 15;9(3):e024159. doi: 10.1136/bmjopen-2018-024159 (PMC6429967; doi:10.1136/bmjopen-2018-024159), 2019-03-15
Supplement: bmjopen-2018-024159supp004.pdf [file bmjopen-2018-024159supp004.pdf]

**Supplemental Content 4. Flow of patients**

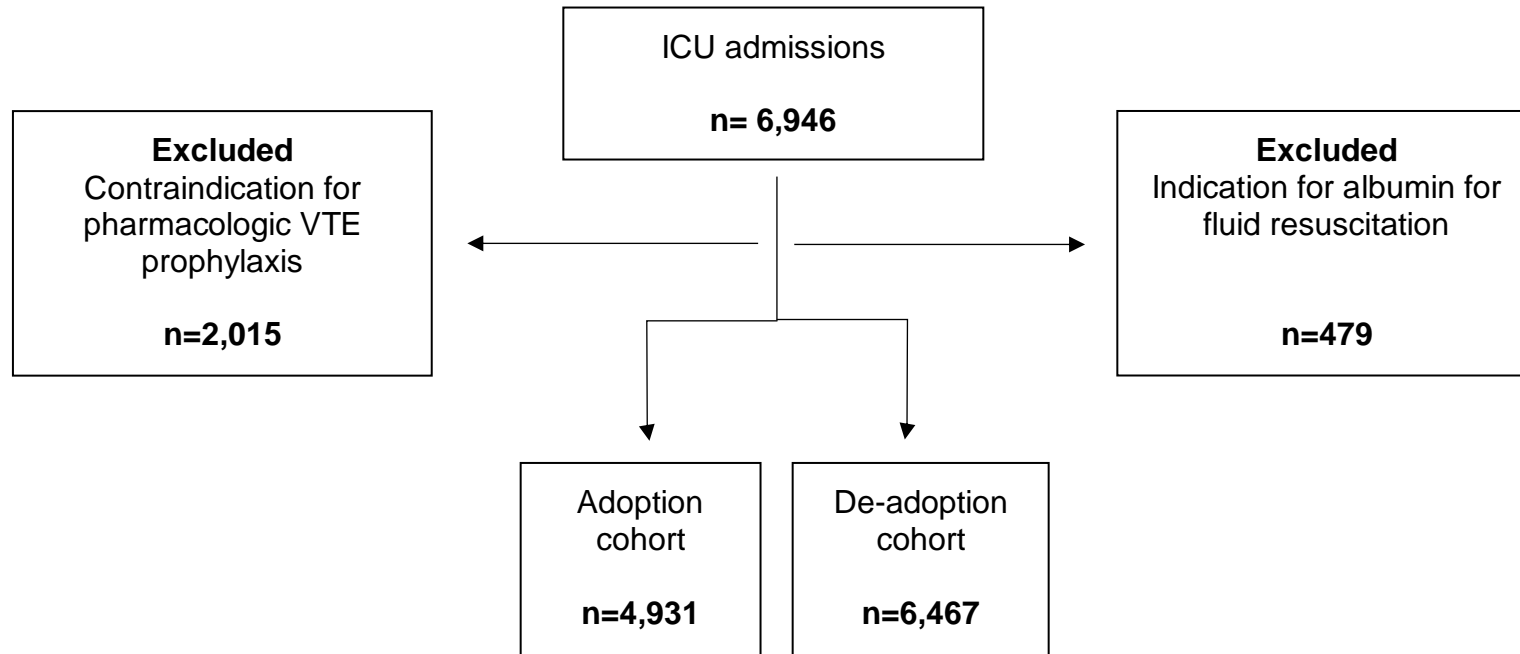

*Footnote:* Adoption cohort = Recommended to receive low molecular weight heparin for venous thromboembolism prophylaxis; de-adoption cohort = Recommended to NOT receive albumin for fluid resuscitation
