# Supplementary material for: Barriers and facilitators to adopting high value practices and de-adopting low value practices in Canadian intensive care units: a multimethod study
Source: PubMed Central journal article supplement — BMJ Open. 2019 Mar 15;9(3):e024159. doi: 10.1136/bmjopen-2018-024159 (PMC6429967; doi:10.1136/bmjopen-2018-024159), 2019-03-15
Supplement: bmjopen-2018-024159supp005.pdf [file bmjopen-2018-024159supp005.pdf]

**Supplemental Content 5. Venous thromboembolism prophylaxis by intensive care unit patient day**

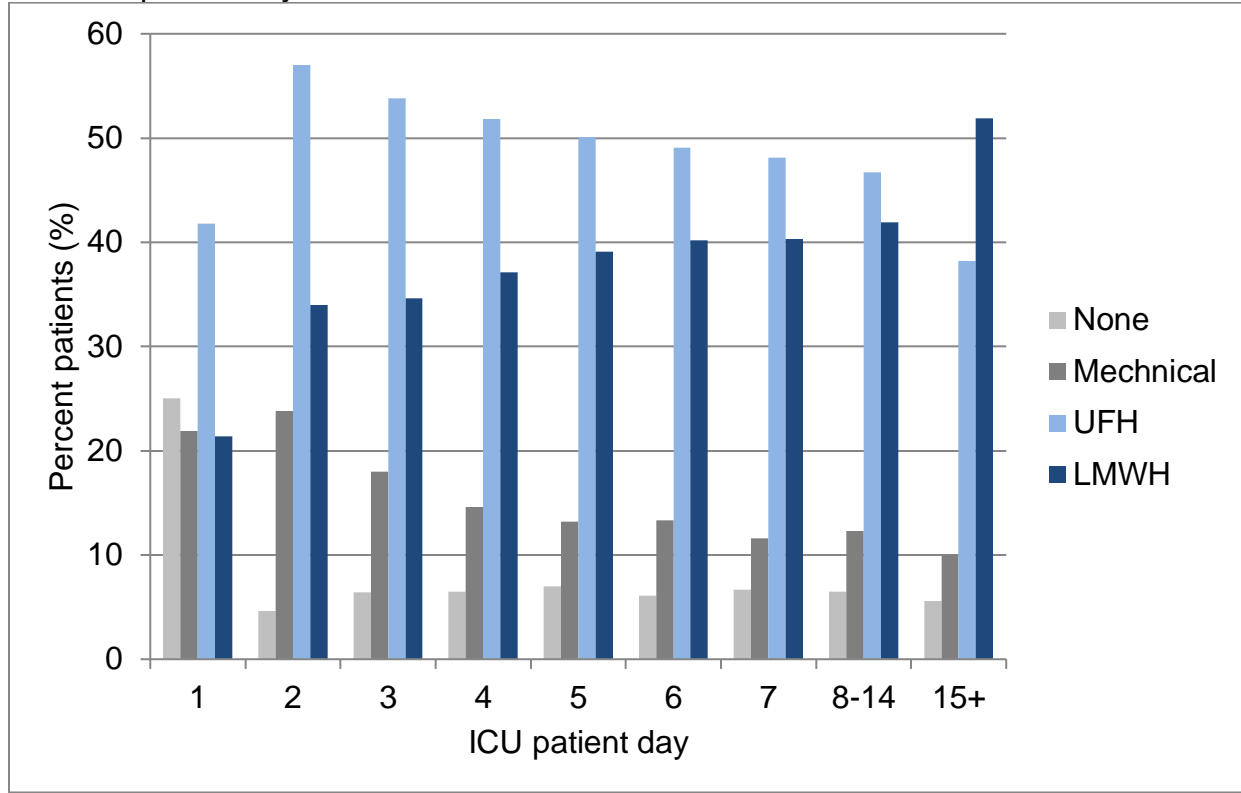

*Footnote:* Percent of patients may add to greater than 100% because patients may have received more than one form of venous thromboembolism prophylaxis on a given patient day.

*Abbreviation:* ICU=intensive care unit, LMWH=low molecular weight heparin, UFH=unfractionated heparin
