# Supplementary material for: Barriers and facilitators to adopting high value practices and de-adopting low value practices in Canadian intensive care units: a multimethod study
Source: PubMed Central journal article supplement — BMJ Open. 2019 Mar 15;9(3):e024159. doi: 10.1136/bmjopen-2018-024159 (PMC6429967; doi:10.1136/bmjopen-2018-024159), 2019-03-15
Supplement: bmjopen-2018-024159supp006.pdf [file bmjopen-2018-024159supp006.pdf]

**Supplemental Content 6.** The use of high value practices (low molecular weight heparin for venous thromboembolism prophylaxis) and the use of low value practices (albumin for fluid resuscitation) by study intensive care unit

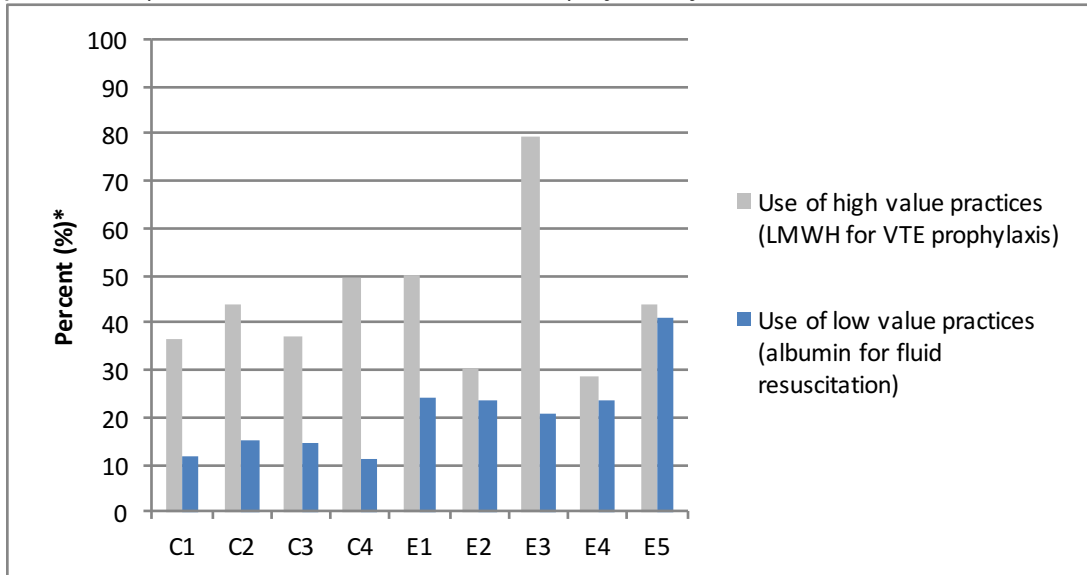

*Footnote:* all “C” sites indicate ICU in Calgary and all “E” sites indicate ICU in Edmonton

\*% of patient-days for VTE prophylaxis and % of patients for albumin
