# Supplementary material for: Barriers and facilitators to adopting high value practices and de-adopting low value practices in Canadian intensive care units: a multimethod study
Source: PubMed Central journal article supplement — BMJ Open. 2019 Mar 15;9(3):e024159. doi: 10.1136/bmjopen-2018-024159 (PMC6429967; doi:10.1136/bmjopen-2018-024159), 2019-03-15
Supplement: bmjopen-2018-024159supp007.pdf [file bmjopen-2018-024159supp007.pdf]

**Supplemental Content 7. Survey participant characteristics**

| <b>Professional group</b>         | <b>% (N)</b>        |
|-----------------------------------|---------------------|
| Attending physician               | 24.7 (64)           |
| Fellow                            | 6.2 (16)            |
| Resident                          | 12.4 (32)           |
| Nurse practitioner                | 5.0 (13)            |
| Nurse manager / charge nurse      | 10.0 (26)           |
| Nurse educator                    | 8.5 (22)            |
| Bedside nurse                     | 23.9 (62)           |
| Pharmacist                        | 9.3 (24)            |
| <b>Years worked in ICU</b>        | <b>Median (IQR)</b> |
| Attending physician               | 14.0 (9.8-22.0)     |
| Clinical fellow                   | 1.8 (1.0-2.3)       |
| Resident                          | 0.3 (0.1-1.0)       |
| Nurse practitioner                | 15.0 (9.0-20.0)     |
| Nurse manager / charge nurse      | 11.5 (7.3-18.8)     |
| Nurse educator                    | 19.0 (10.3-21.5)    |
| Bedside nurse                     | 7.5 (2.5-12.0)      |
| Pharmacist                        | 5.3 (3.0-10.8)      |
| <b>Years worked in healthcare</b> | <b>Median (IQR)</b> |
| Attending physician               | 19.0 (14.8-25.3)    |
| Clinical fellow                   | 8.0 (7.0-9.5)       |
| Resident                          | 3.0 (2.0-5.1)       |
| Nurse practitioner                | 15.0 (12.0-25.0)    |
| Nurse manager / charge nurse      | 16.5 (12.5-24.0)    |
| Nurse educator                    | 21.0 (13.0-26.0)    |
| Bedside nurse                     | 10.0 (6.0-16.0)     |
| Pharmacist                        | 10.5 (6.1-14.3)     |
